# Supplementary material
Source: PubMed Central journal article supplement (PMC3384163)
Supplement: 1118514109_sd01.pdf [file 1118514109_sd01.pdf]

## Supplemental Dataset S1.

### Genes Expressed Differentially in Four F3-Rat Brain Regions in Lineage and Stress Comparisons (16 gene lists)

List 1. Basolateral Amygdala (BLA): Genes Expressed Differentially in Vinclozolin NonStressed as Compared to Control NonStressed (VinNS vs Nst-ContNS contrast)

List 2. Basolateral Amygdala (BLA): Genes Expressed Differentially in Vinclozolin Stressed as Compared to Control Stressed (VinS vs ContS contrast), 101 genes and EST's

List 3. Basolateral Amygdala (BLA): Genes Expressed Differentially in Control Stressed as Compared to Control NonStressed (ConS vs ContNS contrast), 81 genes and EST's

List 4. Basolateral Amygdala (BLA): Genes Expressed Differentially in Vinclozolin Stressed as Compared to Vinclozolin NonStressed (VinS vs VinNS contrast), 62 genes and EST's

List 5. Cortex (Ctx): Genes Expressed Differentially in Vinclozolin NonStressed as Compared to Control NonStressed (VinNS vs ContNS contrast), 118 genes and EST's

List 6. Cortex (Ctx): Genes Expressed Differentially in Vinclozolin Stressed as Compared to Control Stressed (VinS vs ContS contrast), 142 genes and EST's

List 7. Cortex (Ctx): Genes Expressed Differentially in Control Stressed as Compared to Control NonStressed (ContS vs ContNS contrast), 290 genes and EST's

List 8. Cortex (Ctx): Genes Expressed Differentially in Vinclozolin Stressed as Compared to Vinclozolin NonStressed (VinS vs VinNS contrast), 96 genes and EST's

List 9. CA1 of the Hippocampus (CA1): Genes Expressed Differentially in Vinclozolin NonStressed as Compared to Control NonStressed (VinNS vs ContNS contrast), 68 genes and EST's

List 10. CA1 of the Hippocampus (CA1): Genes Expressed Differentially in Vinclozolin Stressed as Compared to Control Stressed (VinS vs ContS contrast), 155 genes and EST's

List 11. CA1 of the Hippocampus (CA1): Genes Expressed Differentially in Control Stressed as Compared to Control NonStressed (ContS vs ContNS contrast), 118 genes and EST's

List 12. CA1 of the Hippocampus (CA1): Genes Expressed Differentially in Vinclozolin Stressed as Compared to Vinclozolin NonStressed (VinS vs VinNS contrast), 379 genes and EST's

List 13. CA3 of the Hippocampus (CA3): Genes Expressed Differentially in Vinclozolin NonStressed as Compared to -Control NonStressed (VinNS vs ContNS contrast), 64 genes and EST's

List 14. CA3 of the Hippocampus (CA3): Genes Expressed Differentially in Vinclozolin Stressed as Compared to Control Stressed (VinS vs ContS contrast), 23 genes and EST's

List 15. CA3 of the Hippocampus (CA3): Genes Expressed Differentially in Control Stressed as Compared to Control NonStressed (ConS vs ContNS contrast), 50 genes and EST's

List 16. CA3 of the Hippocampus (CA3): Genes Expressed Differentially in Vinclozolin Stressed as Compared to Vinclozolin NonStressed (VinS vs VinNS contrast), 202 genes and EST's

**List 1. Genes Expressed Differentially in Non-Stressed F3-Vinclozolin Rat Basolateral Amygdala as Compared to Non-Stressed F3-Control ('Nst-Vin vs Nst-Con' contrast), 79 genes and EST's**

| <i>Gene Symbol</i>                            | <i>GenBank Reference Sequence</i> | <i>Mean_diff</i> | <i>Ratio</i> | <i>Affymetrix ID</i> | <i>Gene Title</i>                                                                       |
|-----------------------------------------------|-----------------------------------|------------------|--------------|----------------------|-----------------------------------------------------------------------------------------|
| <b>Epigenetics</b>                            |                                   |                  |              |                      |                                                                                         |
| Rg9mtd1                                       | NM_001008337                      | -25              | 0.83         | 10750795             | RNA (guanine-9-) methyltransferase domain containing 1                                  |
| LOC365114                                     | ENSRNOT00000018945                | -36              | 0.82         | 10703187             | similar to High mobility group protein 1 (HMG-1)                                        |
| <b>Growth Factors</b>                         |                                   |                  |              |                      |                                                                                         |
| Bmp5                                          | NM_001108168                      | 15               | 1.24         | 10911711             | bone morphogenetic protein 5                                                            |
| Mid1                                          | NM_022927                         | -44              | 0.83         | 10937624             | midline 1                                                                               |
| <b>Immune Response</b>                        |                                   |                  |              |                      |                                                                                         |
| Spag6                                         | NM_001034960                      | 62               | 1.23         | 10752563             | sperm associated antigen 6                                                              |
| <b>Metabolism &amp; Transport</b>             |                                   |                  |              |                      |                                                                                         |
| Doc2b                                         | NM_031142                         | -25              | 0.83         | 10744970             | double C2-like domains, beta                                                            |
| Retsat                                        | NM_145084                         | 94               | 1.26         | 10856424             | retinol saturase (all trans retinol 13,14 reductase)                                    |
| <b>Proteolysis</b>                            |                                   |                  |              |                      |                                                                                         |
| Serpina3k                                     | NM_012657                         | -47              | 0.68         | 10891991             | serine (or cysteine) peptidase inhibitor, clade A, member 3K                            |
| <b>Receptors &amp; Binding Proteins</b>       |                                   |                  |              |                      |                                                                                         |
| Klra5                                         | NM_198746                         | 16               | 1.27         | 10866236             | killer cell lectin-like receptor, subfamily A, member 5                                 |
| Ly49s5                                        | ENSRNOT00000045309                | 23               | 1.22         | 10866180             | Ly49 stimulatory receptor 4                                                             |
| Olr1149                                       | NM_001000874                      | 17               | 1.29         | 10915281             | olfactory receptor 1149                                                                 |
| Olr1233                                       | NM_001001084                      | -42              | 0.76         | 10909168             | olfactory receptor 1233                                                                 |
| Olr1571                                       | ENSRNOT00000034210                | 24               | 1.27         | 10752574             | olfactory receptor 1571                                                                 |
| Htr5b                                         | NM_024395                         | -15              | 0.81         | 10767186             | 5-hydroxytryptamine (serotonin) receptor 5B                                             |
| Efcab1                                        | NM_001106930                      | 42               | 1.29         | 10931558             | EF hand calcium binding domain 1                                                        |
| <b>Signaling</b>                              |                                   |                  |              |                      |                                                                                         |
| Stac2                                         | NM_001108834                      | 38               | 1.28         | 10746842             | SH3 and cysteine rich domain 2                                                          |
| Mrgprb5                                       | NM_001002284                      | 47               | 1.21         | 10707154             | MAS-related G protein-coupled receptor, member B5                                       |
| Sh2d1b1                                       | ENSRNOT00000048692                | -10              | 0.79         | 10765469             | SH2 domain protein 1B1                                                                  |
| Tpte                                          | NM_001108877                      | 10               | 1.22         | 10792456             | transmembrane phosphatase with tensin homology                                          |
| <b>Transcription</b>                          |                                   |                  |              |                      |                                                                                         |
| Npas4                                         | NM_153626                         | 31               | 1.20         | 10727717             | neuronal PAS domain protein 4                                                           |
| Set                                           | NM_001012504                      | -164             | 0.80         | 10749869             | SET nuclear oncogene                                                                    |
| <b>Translation &amp; Protein Modification</b> |                                   |                  |              |                      |                                                                                         |
| RGD1564552                                    | ENSRNOT00000050803                | -141             | 0.73         | 10799888             | similar to ribosomal protein L21                                                        |
| <b>Miscellaneous &amp; Unknown</b>            |                                   |                  |              |                      |                                                                                         |
| LOC288521                                     | BC079301                          | -12              | 0.76         | 10760760             | similar to Leukosialin precursor (Leucocyte sialoglycoprotein) (Sialophorin) (CD43) (W3 |
| RGD1311849                                    | ENSRNOT00000058387                | 26               | 1.22         | 10869837             | similar to mKIAA1797 protein                                                            |
| RGD1565119                                    | ENSRNOT00000048106                | -14              | 0.79         | 10776873             | similar to Mitochondrial carrier triple repeat 1                                        |
| Ccdc162                                       | ENSRNOT00000000340                | 13               | 1.25         | 10833727             | coiled-coil domain containing 162                                                       |
| rno-mir-21                                    | rno-mir-21                        | 30               | 1.25         | 10745931             |                                                                                         |
|                                               | XM_002725832                      | -9               | 0.80         | 10831802             | rCG44733-like                                                                           |

|              |                    |       |      |          |                        |
|--------------|--------------------|-------|------|----------|------------------------|
| LOC100363863 |                    |       |      |          |                        |
| <b>EST's</b> |                    |       |      |          |                        |
| LOC363737    | ENSRNOT00000032643 | -9    | 0.78 | 10750089 | hypothetical LOC363737 |
|              | XR_008519          | -24   | 0.82 | 10732906 |                        |
|              | XR_008445          | -121  | 0.78 | 10880562 |                        |
|              | XR_007871          | -198  | 0.83 | 10927699 |                        |
|              | XR_007680          | 15    | 1.27 | 10791977 |                        |
|              | XR_007365          | -115  | 0.83 | 10813246 |                        |
|              | XR_006323          | -10   | 0.82 | 10923292 |                        |
|              | XR_005743          | -7    | 0.82 | 10937252 |                        |
|              | XR_005657          | -20   | 0.79 | 10898947 |                        |
|              | XR_005430          | 63    | 1.24 | 10877896 |                        |
|              | XM_226468          | 36    | 1.30 | 10807925 |                        |
|              | NC_001665          | -1186 | 0.74 | 10930595 |                        |
|              | ENSRNOT00000060361 | 29    | 1.25 | 10889368 |                        |
|              | ENSRNOT00000053328 | -232  | 0.76 | 10855946 |                        |
|              | ENSRNOT00000053029 | 32    | 1.25 | 10774265 |                        |
|              | ENSRNOT00000052710 | -101  | 0.79 | 10838282 |                        |
|              | 59896131, 41350416 | 12    | 1.30 | 10769693 |                        |
|              | ---                | -1953 | 0.74 | 10930580 |                        |
|              | ---                | -127  | 0.81 | 10772758 |                        |
|              | ---                | -88   | 0.83 | 10811008 |                        |
|              | ---                | -80   | 0.80 | 10761245 |                        |
|              | ---                | -58   | 0.82 | 10711498 |                        |
|              | ---                | -49   | 0.77 | 10864479 |                        |
|              | ---                | -42   | 0.79 | 10832081 |                        |
|              | ---                | -15   | 0.76 | 10795677 |                        |
|              | ---                | -13   | 0.82 | 10836152 |                        |
|              | ---                | -7    | 0.79 | 10870488 |                        |
|              | ---                | 4     | 1.23 | 10814661 |                        |
|              | ---                | 6     | 1.23 | 10932910 |                        |
|              | ---                | 7     | 1.21 | 10936478 |                        |
|              | ---                | 8     | 1.20 | 10709532 |                        |
|              | ---                | 8     | 1.22 | 10799500 |                        |
|              | ---                | 8     | 1.24 | 10768128 |                        |
|              | ---                | 9     | 1.28 | 10716744 |                        |
|              | ---                | 10    | 1.24 | 10702076 |                        |
|              | ---                | 12    | 1.27 | 10884614 |                        |
|              | ---                | 12    | 1.23 | 10815913 |                        |
|              | ---                | 12    | 1.27 | 10820963 |                        |
|              | ---                | 12    | 1.22 | 10781972 |                        |
|              | ---                | 13    | 1.26 | 10785259 |                        |
|              | ---                | 14    | 1.21 | 10782889 |                        |
|              | ---                | 18    | 1.24 | 10893434 |                        |
|              | ---                | 19    | 1.22 | 10861656 |                        |
|              | ---                | 19    | 1.20 | 10917344 |                        |
|              | ---                | 20    | 1.22 | 10816647 |                        |
|              | ---                | 21    | 1.23 | 10726652 |                        |
|              | ---                | 21    | 1.29 | 10776796 |                        |
|              | ---                | 27    | 1.23 | 10813005 |                        |
|              | ---                | 28    | 1.30 | 10815350 |                        |
|              | ---                | 29    | 1.24 | 10873885 |                        |

**List 2. Genes Expressed Differentially in Stressed F3-Vinclozolin Rat Basolateral Amygdala as Compared to Stressed F3-Control ('St-Vin vs St-Con' contrast), 101 genes and EST's**

| <i>Gene Symbol</i> | <i>GenBank_Reference</i> | <i>Mean</i> | <i>Ratio</i> | <i>Affymetrix</i> | <i>Gene Title</i> |
|--------------------|--------------------------|-------------|--------------|-------------------|-------------------|
|--------------------|--------------------------|-------------|--------------|-------------------|-------------------|

|                                               | <i>Sequence</i>    | <i>_diff</i> |      | <i>ID</i> |                                                                                                                              |
|-----------------------------------------------|--------------------|--------------|------|-----------|------------------------------------------------------------------------------------------------------------------------------|
| <b>Cell Cycle</b>                             |                    |              |      |           |                                                                                                                              |
| Cdca3                                         | NM_001007648       | -46          | 0.80 | 10858707  | cell division cycle associated 3                                                                                             |
| <b>Cytoskeleton-ECM</b>                       |                    |              |      |           |                                                                                                                              |
| Pcdhb6                                        | NM_001014780       | 47           | 1.24 | 10801176  | protocadherin beta 6                                                                                                         |
| <b>Development</b>                            |                    |              |      |           |                                                                                                                              |
| Opalin                                        | NM_001017386       | -66          | 0.79 | 10730148  | oligodendrocytic myelin paranodal and inner loop protein                                                                     |
| Mtpn                                          | AY951952           | -11          | 0.83 | 10861826  | myotrophin                                                                                                                   |
| <b>Growth Factors</b>                         |                    |              |      |           |                                                                                                                              |
| Bdnf                                          | NM_012513          | 25           | 1.21 | 10852620  | brain derived neurotrophic factor                                                                                            |
| <b>Metabolism &amp; Transport</b>             |                    |              |      |           |                                                                                                                              |
| Kcnt2                                         | NM_198762          | 79           | 1.26 | 10764460  | potassium channel, subfamily T, member 2                                                                                     |
| LOC685173                                     | XM_001062675       | -18          | 0.77 | 10899693  | similar to carbonic anhydrase 13                                                                                             |
| <b>Proteolysis</b>                            |                    |              |      |           |                                                                                                                              |
| RGD1560658                                    | ENSRNOT00000022681 | 10           | 1.31 | 10798126  | serine (or cysteine) peptidase inhibitor, clade B, member 1b                                                                 |
| <b>Receptors &amp; Binding Proteins</b>       |                    |              |      |           |                                                                                                                              |
| Olr1171                                       | NM_001001005       | 17           | 1.28 | 10915295  | olfactory receptor 1171                                                                                                      |
| Olr1742                                       | NM_001001424       | 13           | 1.26 | 10827655  | olfactory receptor 1742                                                                                                      |
| Olr349                                        | NM_001001019       | 23           | 1.32 | 10729045  | olfactory receptor 349                                                                                                       |
| Olr679                                        | NM_001000354       | 16           | 1.23 | 10847168  | olfactory receptor 679                                                                                                       |
| Olr720                                        | NM_001001067       | 28           | 1.21 | 10847229  | olfactory receptor 720                                                                                                       |
| <b>Signaling</b>                              |                    |              |      |           |                                                                                                                              |
| Arap2                                         | ENSRNOT00000044580 | -18          | 0.78 | 10772895  | ArfGAP with RhoGAP domain, ankyrin repeat and PH domain 2                                                                    |
| Ctxn2                                         | NM_001162935       | 36           | 1.25 | 10839365  | cortexin 2                                                                                                                   |
| RGD1562952                                    | ENSRNOT00000061017 | -238         | 0.72 | 10812779  | similar to Erbb2 interacting protein isoform 2                                                                               |
| <b>Transcription</b>                          |                    |              |      |           |                                                                                                                              |
| LOC365114                                     | ENSRNOT00000018945 | -37          | 0.83 | 10703187  | similar to High mobility group protein 1 (HMG-1) (High mobility group protein B1) (Amphoterin) (Heparin-binding protein p30) |
| Set                                           | NM_001012504       | -189         | 0.80 | 10749869  | SET nuclear oncogene                                                                                                         |
| <b>Translation &amp; Protein Modification</b> |                    |              |      |           |                                                                                                                              |
| Rps27a                                        | ENSRNOT00000042383 | -110         | 0.81 | 10734318  | similar to thymosin, beta 4                                                                                                  |
| RGD1562547                                    | ENSRNOT00000049211 | -62          | 0.82 | 10901960  | similar to ribosomal protein L31                                                                                             |
| RGD1564400                                    | ENSRNOT00000033258 | -87          | 0.81 | 10836556  | similar to Eukaryotic translation initiation factor 5 (eIF-5)                                                                |
| RGD1564552                                    | ENSRNOT00000050803 | -112         | 0.78 | 10799888  | similar to ribosomal protein L21                                                                                             |
| <b>Miscellaneous &amp; Unknown</b>            |                    |              |      |           |                                                                                                                              |
| LOC686096                                     | XM_002730304       | -116         | 0.82 | 10939909  | similar to basic transcription factor 3                                                                                      |
| <b>EST's</b>                                  |                    |              |      |           |                                                                                                                              |
| MGC72627                                      | BC061963           | 55           | 1.20 | 10853407  | similar to RIKEN cDNA A330021E22                                                                                             |
| RGD1560493                                    | ENSRNOT00000032053 | 21           | 1.24 | 10937331  | similar to chromosome X open reading frame 45                                                                                |
|                                               | XR_008237          | -38          | 0.80 | 10926160  |                                                                                                                              |
|                                               | XR_007324          | -23          | 0.80 | 10877933  |                                                                                                                              |
|                                               | XR_007098          | -20          | 0.83 | 10707370  |                                                                                                                              |
|                                               | XR_009222          | -50          | 0.69 | 10729312  |                                                                                                                              |
|                                               | XR_008445          | -162         | 0.72 | 10880562  |                                                                                                                              |

|  |                    |       |      |          |  |
|--|--------------------|-------|------|----------|--|
|  | XR_007232          | -14   | 0.75 | 10784444 |  |
|  | XR_005958          | -9    | 0.82 | 10793706 |  |
|  | XR_008485          | -12   | 0.83 | 10794940 |  |
|  | XR_008126          | 9     | 1.29 | 10822090 |  |
|  | XR_007395          | -13   | 0.70 | 10850440 |  |
|  | XR_009494          | -8    | 0.82 | 10739816 |  |
|  | NC_001665          | -1372 | 0.60 | 10930588 |  |
|  | 6683748            | -70   | 0.79 | 10748234 |  |
|  | ENSRNOT00000059477 | -105  | 0.69 | 10791602 |  |
|  | ENSRNOT00000057420 | -105  | 0.69 | 10833416 |  |
|  | ENSRNOT00000056786 | -145  | 0.67 | 10939699 |  |
|  | ENSRNOT00000054649 | -189  | 0.82 | 10930226 |  |
|  | ENSRNOT00000054517 | -107  | 0.67 | 10797013 |  |
|  | ENSRNOT00000053934 | -363  | 0.82 | 10722465 |  |
|  | ENSRNOT00000052710 | -130  | 0.76 | 10838282 |  |
|  | ENSRNOT00000052697 | 12    | 1.27 | 10878963 |  |
|  | ENSRNOT00000052541 | -30   | 0.69 | 10911811 |  |
|  | ENSRNOT00000018011 | -15   | 0.76 | 10926819 |  |
|  | ENSRNOT00000039948 | -36   | 0.82 | 10767044 |  |
|  | ---                | -263  | 0.74 | 10722451 |  |
|  | ---                | -583  | 0.80 | 10722481 |  |
|  | ---                | -83   | 0.81 | 10869614 |  |
|  | ---                | -65   | 0.83 | 10846749 |  |
|  | ---                | -58   | 0.81 | 10756253 |  |
|  | ---                | -58   | 0.81 | 10756255 |  |
|  | ---                | -54   | 0.77 | 10858497 |  |
|  | ---                | -35   | 0.79 | 10853681 |  |
|  | ---                | -28   | 0.80 | 10764400 |  |
|  | ---                | -21   | 0.78 | 10907958 |  |
|  | ---                | -20   | 0.71 | 10925371 |  |
|  | ---                | -17   | 0.78 | 10769398 |  |
|  | ---                | -16   | 0.79 | 10773706 |  |
|  | ---                | -13   | 0.78 | 10746252 |  |
|  | ---                | -12   | 0.81 | 10776665 |  |
|  | ---                | -11   | 0.83 | 10795677 |  |
|  | ---                | -5    | 0.81 | 10757702 |  |
|  | ---                | 6     | 1.20 | 10853227 |  |
|  | ---                | 7     | 1.22 | 10724580 |  |
|  | ---                | 8     | 1.22 | 10751226 |  |
|  | ---                | 8     | 1.30 | 10718406 |  |
|  | ---                | 9     | 1.23 | 10823430 |  |
|  | ---                | 9     | 1.20 | 10782954 |  |
|  | ---                | 9     | 1.24 | 10931079 |  |
|  | ---                | 10    | 1.26 | 10812884 |  |
|  | ---                | 11    | 1.27 | 10870012 |  |
|  | ---                | 11    | 1.25 | 10785259 |  |
|  | ---                | 11    | 1.22 | 10778575 |  |
|  | ---                | 12    | 1.21 | 10717396 |  |
|  | ---                | 12    | 1.28 | 10922247 |  |
|  | ---                | 12    | 1.22 | 10795717 |  |
|  | ---                | 13    | 1.26 | 10857000 |  |
|  | ---                | 13    | 1.25 | 10781972 |  |
|  | ---                | 13    | 1.32 | 10893404 |  |
|  | ---                | 13    | 1.23 | 10887074 |  |
|  | ---                | 13    | 1.23 | 10752096 |  |

|     |    |      |          |  |
|-----|----|------|----------|--|
| --- | 14 | 1.20 | 10711257 |  |
| --- | 15 | 1.26 | 10707254 |  |
| --- | 17 | 1.20 | 10792099 |  |
| --- | 17 | 1.26 | 10890570 |  |
| --- | 17 | 1.29 | 10917318 |  |
| --- | 18 | 1.23 | 10868794 |  |
| --- | 25 | 1.43 | 10939931 |  |
| --- | 25 | 1.41 | 10920630 |  |
| --- | 25 | 1.24 | 10939899 |  |
| --- | 27 | 1.23 | 10801707 |  |
| --- | 29 | 1.23 | 10909070 |  |
| --- | 30 | 1.30 | 10772554 |  |
| --- | 39 | 1.31 | 10846650 |  |
| --- | 40 | 1.29 | 10791561 |  |

**List 3. Genes Expressed Differentially in Stressed F3-Control Rat Basolateral Amygdala as Compared to Non-Stressed F3-Control ('Str-Con vs Nst-Con' contrast), 81 genes and EST's**

| <i>Gene Symbol</i>                | <i>GenBank Reference Sequence</i> | <i>Mean_diff</i> | <i>Ratio</i> | <i>Affymetrix ID</i> | <i>Gene Title</i>                                                  |
|-----------------------------------|-----------------------------------|------------------|--------------|----------------------|--------------------------------------------------------------------|
| <b>Cytoskeleton-ECM</b>           |                                   |                  |              |                      |                                                                    |
| Tspan33                           | NM_001109227                      | -85              | 0.81         | 10854199             | tetraspanin 33                                                     |
| Coro1a                            | NM_130411                         | -152             | 0.76         | 10725806             | coronin, actin binding protein 1A                                  |
| Dbnl                              | NM_031352                         | -56              | 0.83         | 10773999             | drebrin-like                                                       |
| <b>Development</b>                |                                   |                  |              |                      |                                                                    |
| Baalc                             | NM_144762                         | -53              | 0.82         | 10896250             | brain and acute leukemia, cytoplasmic                              |
| Cpne4                             | NM_001109003                      | -141             | 0.62         | 10912718             | copine IV                                                          |
| Nell2                             | NM_031070                         | -274             | 0.83         | 10906546             | NEL-like 2 (chicken)                                               |
| Ntng2                             | NM_001107825                      | -26              | 0.83         | 10844082             | netrin G2                                                          |
| RGD1563738                        | ENSRNOT00000052026                | 20               | 1.29         | 10909263             | similar to Discs, large homolog 5 (Placenta and prostate DLG)      |
| Sprn                              | NM_001031845                      | -83              | 0.79         | 10726620             | shadow of prion protein homolog (zebrafish)                        |
| Synj2                             | NM_001113371                      | -106             | 0.67         | 10702829             | synaptojanin 2                                                     |
| Synpo2                            | ENSRNOT00000019931                | 8                | 1.20         | 10826541             | synaptopodin 2                                                     |
| Tmem59l                           | BC089056                          | -110             | 0.81         | 10787556             | transmembrane protein 59-like                                      |
| Trpc4                             | NM_080396                         | -83              | 0.62         | 10815352             | transient receptor potential cation channel, subfamily C, member 4 |
| <b>Epigenetics</b>                |                                   |                  |              |                      |                                                                    |
| Cog7                              | NM_001033889                      | -41              | 0.82         | 10725427             | component of oligomeric golgi complex 7                            |
| <b>Growth Factors</b>             |                                   |                  |              |                      |                                                                    |
| Bdnf                              | NM_012513                         | -25              | 0.83         | 10852620             | brain derived neurotrophic factor                                  |
| Fgf1                              | NM_012846                         | 9                | 1.26         | 10804127             | fibroblast growth factor 1                                         |
| <b>Immune Response</b>            |                                   |                  |              |                      |                                                                    |
| Igha                              | BC092592                          | 18               | 1.29         | 10892572             | immunoglobulin heavy chain, alpha                                  |
| Klra7                             | XM_578407                         | 23               | 1.45         | 10866140             | killer cell lectin-like receptor, subfamily A, member 7            |
| Mal2                              | NM_198786                         | -356             | 0.72         | 10896533             | mal, T-cell differentiation protein 2                              |
| <b>Metabolism &amp; Transport</b> |                                   |                  |              |                      |                                                                    |
| Kcnj9                             | NM_053834                         | -20              | 0.81         | 10770022             | potassium inwardly-rectifying channel, subfamily J, member 9       |
| Kcnn2                             | NM_019314                         | -67              | 0.82         | 10801520             | potassium intermediate                                             |
| Kcnt2                             | NM_198762                         | -125             | 0.71         | 10764460             | potassium channel, subfamily T, member 2                           |
| Atp6v1a                           | NM_001108318                      | -536             | 0.81         | 10823609             | ATPase, H+ transporting, lysosomal V1 subunit A                    |

|                                               |                    |      |      |          |                                                         |
|-----------------------------------------------|--------------------|------|------|----------|---------------------------------------------------------|
| Cth                                           | NM_017074          | -25  | 0.83 | 10827517 | cystathionase (cystathionine gamma-lyase)               |
| Fetub                                         | NM_053348          | -26  | 0.78 | 10755148 | fetuin B                                                |
| Msra                                          | NM_053307          | -42  | 0.78 | 10784517 | methionine sulfoxide reductase A                        |
| Ppap2a                                        | NM_022538          | -114 | 0.78 | 10813048 | phosphatidic acid phosphatase type 2A                   |
| Syp                                           | NM_012664          | -568 | 0.82 | 10937103 | synaptophysin                                           |
| Faah                                          | NM_024132          | -82  | 0.77 | 10871182 | fatty acid amide hydrolase                              |
| LOC685173                                     | XM_001062675       | 16   | 1.25 | 10899693 | similar to carbonic anhydrase 13                        |
| <b>Proteolysis</b>                            |                    |      |      |          |                                                         |
| Prep                                          | NM_001106281       | -45  | 0.82 | 10708672 | prolylcarboxypeptidase (angiotensinase C)               |
| <b>Receptors &amp; Binding Proteins</b>       |                    |      |      |          |                                                         |
| Olr98                                         | NM_001000143       | 16   | 1.22 | 10709432 | olfactory receptor 98                                   |
| RGD1560871                                    | ENSRNOT00000022951 | -71  | 0.79 | 10863960 | similar to plexin 1                                     |
| Nrp1                                          | NM_145098          | -45  | 0.70 | 10808959 | neuropilin 1                                            |
| <b>Signaling</b>                              |                    |      |      |          |                                                         |
| Cmtm4                                         | NM_001172151       | -83  | 0.83 | 10805716 | CKLF-like MARVEL transmembrane domain containing 4      |
| Ehd3                                          | NM_138890          | -108 | 0.79 | 10888596 | EH-domain containing 3                                  |
| Hpcal4                                        | NM_017357          | -255 | 0.81 | 10871732 | hippocalcin-like 4                                      |
| Ifi2711                                       | NM_203410          | -168 | 0.79 | 10886573 | interferon, alpha-inducible protein 27                  |
| Prkar1b                                       | NM_001033679       | -204 | 0.80 | 10757119 | protein kinase, cAMP dependent regulatory, type I, beta |
| RGD1561667                                    | ENSRNOT00000059957 | 25   | 1.24 | 10703287 | similar to putative protein kinase                      |
| Shd                                           | NM_001108223       | -29  | 0.82 | 10931523 | src homology 2 domain-containing transforming protein D |
| Tmem74                                        | ENSRNOT00000006791 | -47  | 0.77 | 10903560 | transmembrane protein 74                                |
| Srgap1                                        | ENSRNOT00000006180 | 35   | 1.36 | 10902765 | SLIT-ROBO Rho GTPase activating protein 1               |
| <b>Translation &amp; Protein Modification</b> |                    |      |      |          |                                                         |
| Bin1                                          | NM_053959          | -210 | 0.83 | 10800760 | bridging integrator 1                                   |
| Ccdc32                                        | NM_001024245       | -111 | 0.80 | 10848499 | coiled-coil domain containing 32                        |
| Dnajb1                                        | NM_001108441       | -74  | 0.77 | 10810295 | DnaJ (Hsp40) homolog, subfamily B, member 1             |
| <b>Translation</b>                            |                    |      |      |          |                                                         |
| RGD1562547                                    | ENSRNOT00000049211 | 67   | 1.24 | 10901960 | similar to ribosomal protein L31                        |
| Rps21                                         | NM_031111          | 104  | 1.23 | 10873649 | ribosomal protein S21                                   |
| <b>Miscellaneous &amp; Unknown</b>            |                    |      |      |          |                                                         |
| Fam40a                                        | ENSRNOT00000025036 | -46  | 0.80 | 10825830 | family with sequence similarity 40, member A            |
| LOC501427                                     | ENSRNOT00000061060 | 9    | 1.26 | 10779531 | similar to Spetex-2F protein                            |
| Wdr1                                          | NM_001014135       | -165 | 0.83 | 10773205 | WD repeat domain 1                                      |
| <b>EST's</b>                                  |                    |      |      |          |                                                         |
| LOC498145                                     | NM_001017485       | -57  | 0.81 | 10760393 | similar to RIKEN cDNA 2810453I06                        |
|                                               | ENSRNOT00000048364 | -14  | 0.76 | 10900112 |                                                         |
|                                               | ENSRNOT00000052541 | 27   | 1.39 | 10911811 |                                                         |
|                                               | ENSRNOT00000057420 | 112  | 1.49 | 10833416 |                                                         |
|                                               | ENSRNOT00000059477 | 112  | 1.49 | 10791602 |                                                         |
|                                               | NC_001665          | 1587 | 1.35 | 10930595 |                                                         |
|                                               | NC_001665          | 1419 | 1.69 | 10930588 |                                                         |
|                                               | ---                | -51  | 0.70 | 10755315 |                                                         |
|                                               | ---                | -18  | 0.77 | 10917318 |                                                         |
|                                               | ---                | -15  | 0.82 | 10782179 |                                                         |
|                                               | ---                | -11  | 0.75 | 10707639 |                                                         |
|                                               | ---                | -9   | 0.81 | 10850610 |                                                         |
|                                               | ---                | -8   | 0.83 | 10931079 |                                                         |
|                                               | ---                | -5   | 0.83 | 10891491 |                                                         |

|  |           |     |      |          |  |
|--|-----------|-----|------|----------|--|
|  | ---       | 8   | 1.30 | 10856117 |  |
|  | ---       | 9   | 1.30 | 10850313 |  |
|  | XR_007232 | 10  | 1.23 | 10784444 |  |
|  | ---       | 10  | 1.27 | 10909127 |  |
|  | ---       | 10  | 1.24 | 10702076 |  |
|  | ---       | 11  | 1.22 | 10776665 |  |
|  | XR_008088 | 12  | 1.24 | 10786415 |  |
|  | ---       | 12  | 1.23 | 10818253 |  |
|  | ---       | 34  | 1.25 | 10853681 |  |
|  | ---       | 36  | 1.21 | 10847062 |  |
|  | ---       | 45  | 1.36 | 10914009 |  |
|  | ---       | 51  | 1.28 | 10858497 |  |
|  | ---       | 66  | 1.28 | 10756253 |  |
|  | ---       | 66  | 1.28 | 10756255 |  |
|  | ---       | 807 | 1.26 | 10930622 |  |
|  | ---       | 969 | 1.29 | 10930560 |  |

**List 4. Genes Expressed Differentially in Stressed F3-Vinclozolin Rat Basolateral Amygdala as Compared to Non-Stressed F3-Vinclozolin ('Str-Vin vs Nst-Vin' contrast), 62 genes and EST's**

| <i>Gene Symbol</i>                | <i>GenBank Reference Sequence</i> | <i>Mean_diff</i> | <i>Ratio</i> | <i>Affymetrix ID</i> | <i>Gene Title</i>                                                                        |
|-----------------------------------|-----------------------------------|------------------|--------------|----------------------|------------------------------------------------------------------------------------------|
| <b>Development</b>                |                                   |                  |              |                      |                                                                                          |
| Gdap111                           | NM_001107798                      | -47              | 0.83         | 10842001             | ganglioside-induced differentiation-associated protein 1-like 1                          |
| LOC689690                         | ENSRNOT00000052385                | 39               | 1.44         | 10809503             | similar to Discs large homolog 5 (Placenta and prostate DLG) (Discs large protein P-dlg) |
| Nptx2                             | NM_001034199                      | -106             | 0.74         | 10760290             | neuronal pentraxin 2                                                                     |
| RGD1563738                        | ENSRNOT00000052026                | 15               | 1.21         | 10916360             | similar to Discs, large homolog 5 (Placenta and prostate DLG)                            |
| Sntb2                             | NM_001168674                      | 37               | 1.21         | 10807601             | syntrophin, beta 2                                                                       |
| <b>Electron Transport</b>         |                                   |                  |              |                      |                                                                                          |
| Cyp26b1                           | NM_181087                         | -31              | 0.77         | 10863608             | cytochrome P450, family 26, subfamily b, polypeptide 1                                   |
| <b>Epigenetics</b>                |                                   |                  |              |                      |                                                                                          |
| LOC689244                         | ENSRNOT00000061517                | 127              | 1.50         | 10756280             | similar to chromobox homolog 3                                                           |
| LOC501799                         | ENSRNOT00000061397                | 163              | 1.34         | 10756257             | similar to chromobox homolog 3                                                           |
| <b>Immune Response</b>            |                                   |                  |              |                      |                                                                                          |
| Igsf21                            | ENSRNOT00000051793                | -52              | 0.81         | 10880936             | immunoglobulin superfamily, member 21                                                    |
| RT1-CE10                          | NM_001008833                      | 29               | 1.26         | 10828001             | RT1 class I, locus CE10                                                                  |
| <b>Metabolism &amp; Transport</b> |                                   |                  |              |                      |                                                                                          |
| Kcna6                             | NM_023954                         | -75              | 0.81         | 10865738             | potassium voltage gated channel, shaker related subfamily, member 6                      |
| Kcnj9                             | NM_053834                         | -20              | 0.82         | 10770022             | potassium inwardly-rectifying channel, subfamily J, member 9                             |
| Alas2                             | NM_013197                         | 17               | 1.21         | 10932912             | aminolevulinate, delta-, synthase 2                                                      |
| Decr1                             | NM_057197                         | 51               | 1.23         | 10875631             | 2,4-dienoyl CoA reductase 1, mitochondrial                                               |
| Hpgd                              | NM_024390                         | 17               | 1.29         | 10791522             | hydroxyprostaglandin dehydrogenase 15 (NAD)                                              |
| <b>Proteolysis</b>                |                                   |                  |              |                      |                                                                                          |
| RGD1559940                        | ENSRNOT00000038310                | 12               | 1.20         | 10900050             | similar to ubiquitin-conjugating enzyme E2G 1 (UBC7 homolog, C. elegans)                 |
| <b>Receptors &amp; Binding</b>    |                                   |                  |              |                      |                                                                                          |



| <b>Proteins</b>                    |                    |      |      |          |                                               |
|------------------------------------|--------------------|------|------|----------|-----------------------------------------------|
| Olr1093                            | NM_001001388       | 41   | 1.23 | 10901100 | olfactory receptor 1093                       |
| Olr1117                            | NM_001000884       | -15  | 0.81 | 10915199 | olfactory receptor 1117                       |
| Olr668                             | NM_001000348       | -12  | 0.80 | 10847146 | olfactory receptor 668                        |
| Olr995                             | NM_001000938       | 16   | 1.30 | 10893373 | olfactory receptor 995                        |
| Grm2                               | NM_001105711       | -65  | 0.67 | 10919953 | glutamate receptor, metabotropic 2            |
| LOC304239                          | ENSRNOT00000049215 | 37   | 1.27 | 10756334 | similar to RalA binding protein 1             |
| Vom2r1                             | NM_001099460       | 27   | 1.24 | 10701668 | vomer nasal 2 receptor, 3                     |
| Vom2r2                             | ENSRNOT00000051591 | 8    | 1.20 | 10701636 | vomer nasal 2 receptor, 2                     |
| <b>Signaling</b>                   |                    |      |      |          |                                               |
| Arrb2                              | NM_012911          | -43  | 0.82 | 10735205 | arrestin, beta 2                              |
| Exph5                              | ENSRNOT00000039336 | -19  | 0.81 | 10909987 | exophilin 5                                   |
| RGD1560209                         | ENSRNOT00000047232 | 15   | 1.20 | 10796831 | similar to MAP                                |
| Sh2d1b1                            | ENSRNOT00000048692 | 9    | 1.24 | 10765469 | SH2 domain protein 1B1                        |
| Stac2                              | NM_001108834       | -36  | 0.79 | 10746842 | SH3 and cysteine rich domain 2                |
| <b>Transcription</b>               |                    |      |      |          |                                               |
| Junb                               | NM_021836          | -25  | 0.80 | 10806585 | jun B proto-oncogene                          |
| Mtpn                               | AY951952           | -11  | 0.82 | 10861826 | myotrophin                                    |
| Znf622                             | NM_001034912       | -94  | 0.83 | 10813934 | family with sequence similarity 134, member B |
| <b>Miscellaneous &amp; Unknown</b> |                    |      |      |          |                                               |
| LOC501427                          | ENSRNOT00000061060 | 8    | 1.28 | 10779531 | similar to Spetex-2F protein                  |
| RGD1561734                         | ENSRNOT00000056348 | -53  | 0.79 | 10925933 | similar to KIAA1913                           |
| <b>EST's</b>                       |                    |      |      |          |                                               |
| LOC363337                          | BC082068           | 31   | 1.21 | 10931083 | similar to RIKEN cDNA 1700081O22              |
|                                    | XR_007680          | -14  | 0.79 | 10791977 |                                               |
|                                    | XR_006025          | -5   | 0.80 | 10775566 |                                               |
|                                    | XM_001080565       | 51   | 1.21 | 10729852 |                                               |
|                                    | NC_001665          | 1455 | 1.43 | 10930595 |                                               |
|                                    | NC_001665          | 804  | 1.62 | 10930588 |                                               |
|                                    | ENSRNOT00000055830 | 66   | 1.23 | 10859162 |                                               |
|                                    | ENSRNOT00000053106 | -12  | 0.83 | 10908229 |                                               |
|                                    | ENSRNOT00000053029 | -30  | 0.82 | 10774265 |                                               |
|                                    | ENSRNOT00000040251 | -9   | 0.83 | 10868279 |                                               |
|                                    | 59896131, 41350416 | -14  | 0.72 | 10769693 |                                               |
|                                    | ---                | -31  | 0.75 | 10815350 |                                               |
|                                    | ---                | -54  | 0.83 | 10871661 |                                               |
|                                    | ---                | -23  | 0.76 | 10775577 |                                               |
|                                    | ---                | -11  | 0.83 | 10932132 |                                               |
|                                    | ---                | -9   | 0.81 | 10929592 |                                               |
|                                    | ---                | -7   | 0.81 | 10729120 |                                               |
|                                    | ---                | 5    | 1.22 | 10746914 |                                               |
|                                    | ---                | 5    | 1.24 | 10852168 |                                               |
|                                    | ---                | 11   | 1.29 | 10857203 |                                               |
|                                    | ---                | 19   | 1.21 | 10809071 |                                               |
|                                    | ---                | 25   | 1.28 | 10802574 |                                               |
|                                    | ---                | 37   | 1.22 | 10864479 |                                               |
|                                    | ---                | 48   | 1.42 | 10726672 |                                               |
|                                    | ---                | 151  | 1.21 | 10718134 |                                               |
|                                    | ---                | 763  | 1.27 | 10930560 |                                               |
|                                    | ---                | 930  | 1.36 | 10930622 |                                               |
|                                    | ---                | 2253 | 1.41 | 10930580 |                                               |

**List 5. Genes Expressed Differentially in Non-Stressed F3-Vinclozolin Rat Cortex Region as Compared to Non-Stressed F3-Control ('Nst-Vin vs Nst-Con' contrast), 118 genes and EST's**

| <i>Gene Symbol</i> | <i>GenBank_Reference</i> | <i>Mean</i> | <i>Ratio</i> | <i>Affymetrix</i> | <i>Gene Title</i> |
|--------------------|--------------------------|-------------|--------------|-------------------|-------------------|
|--------------------|--------------------------|-------------|--------------|-------------------|-------------------|

|                                         | <i>Sequence</i>    | <i>_diff</i> |      | <i>ID</i> |                                                                                                                 |
|-----------------------------------------|--------------------|--------------|------|-----------|-----------------------------------------------------------------------------------------------------------------|
| <b>Cytoskeleton-ECM</b>                 |                    |              |      |           |                                                                                                                 |
| Pcdhb19                                 | ENSRNOT00000060484 | 28           | 1.22 | 10801204  | protocadherin beta 19                                                                                           |
| <b>Development</b>                      |                    |              |      |           |                                                                                                                 |
| Egln2                                   | NM_001004083       | 57           | 1.22 | 10719958  | EGL nine homolog 2 ( <i>C. elegans</i> )                                                                        |
| LOC681385                               | ENSRNOT00000067576 | 6            | 1.23 | 10843857  | similar to Vomeronasal secretory protein 2 precursor (Vomeronasal secretory protein II) (VNSP II) (Lipocalin-4) |
| <b>Electron Transport</b>               |                    |              |      |           |                                                                                                                 |
| Cyp2r1                                  | NM_001108499       | -13          | 0.79 | 10725045  | cytochrome P450, family 2, subfamily r, polypeptide 1                                                           |
| LOC305698                               | ENSRNOT00000049636 | -28          | 0.83 | 10779240  | similar to RIKEN cDNA 1700001F09                                                                                |
| <b>Epigenetics</b>                      |                    |              |      |           |                                                                                                                 |
| Mettl11a                                | NM_001025019       | 33           | 1.20 | 10835252  | methyltransferase like 11A                                                                                      |
| Hist1h4b                                | NM_022686          | 125          | 1.20 | 10798490  | histone cluster 1, H4b                                                                                          |
| <b>Growth Factors</b>                   |                    |              |      |           |                                                                                                                 |
| Ccl27                                   | NM_001108660       | 90           | 1.22 | 10876193  | chemokine (C-C motif) ligand 27                                                                                 |
| <b>Hormones</b>                         |                    |              |      |           |                                                                                                                 |
| Gphb5                                   | NM_001007013       | -12          | 0.83 | 10890626  | glycoprotein hormone beta 5                                                                                     |
| Pth                                     | NM_017044          | 12           | 1.21 | 10724987  | parathyroid hormone                                                                                             |
| <b>Immune Response</b>                  |                    |              |      |           |                                                                                                                 |
| Btnl7                                   | NM_212488          | -40          | 0.82 | 10828335  | butyrophilin-like 7                                                                                             |
| Ly6b                                    | NM_139257          | 6            | 1.25 | 10904590  | lymphocyte antigen 6 complex, locus B                                                                           |
| Slamf9                                  | NM_001105971       | -12          | 0.83 | 10765746  | SLAM family member 9                                                                                            |
| <b>Metabolism &amp; Transport</b>       |                    |              |      |           |                                                                                                                 |
| Akr1b7                                  | NM_053781          | 6            | 1.22 | 10854427  | aldo-keto reductase family 1, member B7                                                                         |
| Akr1d1                                  | NM_138884          | -15          | 0.78 | 10854548  | aldo-keto reductase family 1, member D1 (delta 4-3-ketosteroid-5-beta-reductase)                                |
| Apool                                   | NM_001014105       | -23          | 0.81 | 10934700  | apolipoprotein O-like                                                                                           |
| Bphl                                    | NM_001037206       | 13           | 1.25 | 10798100  | biphenyl hydrolase-like (serine hydrolase)                                                                      |
| Comm8                                   | NM_001106004       | -28          | 0.83 | 10772517  | COMM domain containing 8                                                                                        |
| Ndufa1                                  | NM_001108813       | 66           | 1.20 | 10931991  | NADH dehydrogenase (ubiquinone) 1 alpha subcomplex, 1                                                           |
| Nqo2                                    | NM_001004214       | -58          | 0.69 | 10798119  | NAD(P)H dehydrogenase, quinone 2                                                                                |
| Pafah1b3                                | NM_053654          | -48          | 0.82 | 10719817  | platelet-activating factor acetylhydrolase, isoform 1b, subunit 3                                               |
| Sepw1                                   | NM_013027          | 68           | 1.21 | 10719212  | selenoprotein W, 1                                                                                              |
| Mgst1                                   | NM_134349          | 23           | 1.21 | 10859392  | microsomal glutathione S-transferase 1                                                                          |
| Cerkl                                   | ENSRNOT00000043238 | 6            | 1.20 | 10846671  | ceramide kinase-like                                                                                            |
| <b>Proteolysis</b>                      |                    |              |      |           |                                                                                                                 |
| Slpil2                                  | NM_001008872       | 13           | 1.29 | 10851573  | antileukoproteinase-like 2                                                                                      |
| <b>Receptors &amp; Binding Proteins</b> |                    |              |      |           |                                                                                                                 |
| Agtr1b                                  | NM_031009          | -17          | 0.82 | 10822516  | angiotensin II receptor, type 1b                                                                                |
| Epha8                                   | ENSRNOT00000017559 | -15          | 0.81 | 10880738  | Eph receptor A8                                                                                                 |
| Igfbp6                                  | NM_013104          | -149         | 0.62 | 10899465  | insulin-like growth factor binding protein 6                                                                    |
| Olr1060                                 | NM_001000698       | 26           | 1.68 | 10900087  | olfactory receptor 1060                                                                                         |
| Olr1237                                 | NM_001000963       | 11           | 1.28 | 10909176  | olfactory receptor 1237                                                                                         |
| Olr1560                                 | NM_001001009       | 27           | 1.22 | 10750649  | olfactory receptor 1560                                                                                         |
| Olr29                                   | NM_001000691       | 24           | 1.35 | 10723519  | olfactory receptor 29                                                                                           |
| Olr481                                  | NM_001000684       | -13          | 0.83 | 10846950  | olfactory receptor 481                                                                                          |

|                                               |                    |      |      |          |                                                                         |
|-----------------------------------------------|--------------------|------|------|----------|-------------------------------------------------------------------------|
| Olr631                                        | NM_001000339       | -49  | 0.81 | 10847113 | olfactory receptor 631                                                  |
| Olr703                                        | NM_001000359       | 7    | 1.20 | 10847193 | olfactory receptor 703                                                  |
| Olr724                                        | NM_001000573       | -12  | 0.80 | 10847233 | olfactory receptor 724                                                  |
| Taar8a                                        | NM_175599          | 8    | 1.23 | 10717268 | trace amine-associated receptor 8a                                      |
| <b>Signaling</b>                              |                    |      |      |          |                                                                         |
| LOC689617                                     | ENSRNOT00000058250 | 36   | 1.36 | 10815215 | similar to GTPase activating protein testicular GAP1                    |
| Mrgprb4                                       | ENSRNOT00000045792 | -43  | 0.73 | 10722218 | MAS-related GPR, member B4                                              |
| Rassf9                                        | NM_022959          | -12  | 0.83 | 10895247 | Ras association (RalGDS)                                                |
| Scube1                                        | NM_001134884       | 38   | 1.21 | 10905843 | signal peptide, CUB domain, EGF-like 1                                  |
| Snx11                                         | NM_001012012       | 51   | 1.23 | 10746594 | sorting nexin 11                                                        |
| <b>Transcription</b>                          |                    |      |      |          |                                                                         |
| Chchd2                                        | NM_001015019       | 113  | 1.31 | 10930091 | coiled-coil-helix-coiled-coil-helix domain containing 2                 |
| Chchd6                                        | NM_001106608       | 90   | 1.23 | 10863993 | coiled-coil-helix-coiled-coil-helix domain containing 6                 |
| Fbxo23                                        | NM_001013138       | 122  | 1.27 | 10797368 | F-box only protein 23                                                   |
| Nola2                                         | NM_001105779       | 90   | 1.21 | 10733380 | NHP2 ribonucleoprotein homolog (yeast)                                  |
| Ry1                                           | NM_001108636       | -53  | 0.81 | 10782583 | small nuclear ribonucleoprotein 27kDa (U4)                              |
| Top1mt                                        | NM_001002798       | 16   | 1.21 | 10904612 | topoisomerase (DNA) I, mitochondrial                                    |
| <b>Translation &amp; Protein Modification</b> |                    |      |      |          |                                                                         |
| RGD1564552                                    | ENSRNOT00000050803 | -97  | 0.69 | 10799888 | similar to ribosomal protein L21                                        |
| Rpl22l1                                       | NM_001108548       | -73  | 0.82 | 10814650 | ribosomal protein L22 like 1                                            |
| Rpl36                                         | NM_022504          | 91   | 1.36 | 10772984 | ribosomal protein L36                                                   |
| <b>Miscellaneous &amp; Unknown</b>            |                    |      |      |          |                                                                         |
| LOC501427                                     | ENSRNOT00000061060 | -14  | 0.72 | 10779531 | similar to Spetex-2F protein                                            |
| Lrrn4                                         | ENSRNOT00000040802 | -30  | 0.82 | 10850170 | leucine rich repeat neuronal 4                                          |
| Magohb                                        | ENSRNOT00000013725 | -18  | 0.81 | 10866265 | mago-nashi homolog B (Drosophila)                                       |
| RGD1310587                                    | NM_001100857       | -17  | 0.83 | 10770517 | similar to hypothetical protein FLJ14146                                |
| RGD1565493                                    | XM_002729803       | -11  | 0.83 | 10903280 | similar to DKFZP434I092 protein                                         |
| Samd12                                        | NM_001130562       | -79  | 0.82 | 10903721 | sterile alpha motif domain containing 12                                |
| Ttc36                                         | NM_001005546       | -34  | 0.80 | 10916876 | tetratricopeptide repeat domain 36                                      |
| RGD1565166                                    | NM_001105762       | 10   | 1.22 | 10731622 | similar to MGC45438 protein                                             |
| RGD1566243                                    | NM_001134635       | -6   | 0.82 | 10909777 | similar to protein of unknown function                                  |
| Utp3                                          | NM_001012036       | 22   | 1.20 | 10776064 | UTP3, small subunit (SSU) processome component, homolog (S. cerevisiae) |
| <b>EST's</b>                                  |                    |      |      |          |                                                                         |
| RGD1309501                                    | NM_001127537       | -30  | 0.79 | 10774403 | hypothetical LOC305552                                                  |
| LOC306766                                     | NM_001014007       | 114  | 1.31 | 10794172 | hypothetical LOC306766                                                  |
| RGD1310794                                    | BC093393           | -23  | 0.81 | 10853515 | similar to RIKEN cDNA C030048B08                                        |
|                                               | XR_008339          | -35  | 0.75 | 10845365 |                                                                         |
|                                               | XR_009246          | 12   | 1.30 | 10731555 |                                                                         |
|                                               | XR_009095          | -17  | 0.81 | 10828152 |                                                                         |
|                                               | XR_008340          | -50  | 0.79 | 10717829 |                                                                         |
|                                               | XR_007585          | 29   | 1.46 | 10934560 |                                                                         |
|                                               | NC_001665          | 30   | 1.35 | 10930610 |                                                                         |
|                                               | K02909             | 70   | 1.21 | 10918820 |                                                                         |
|                                               | ENSRNOT00000060122 | -31  | 0.83 | 10884046 |                                                                         |
|                                               | ENSRNOT00000056786 | -108 | 0.60 | 10939699 |                                                                         |
|                                               | ENSRNOT00000053279 | 311  | 1.35 | 10708691 |                                                                         |
|                                               | ENSRNOT00000042423 | 28   | 1.24 | 10938712 |                                                                         |
|                                               | 37727288           | -278 | 0.69 | 10760298 |                                                                         |
|                                               | ---                | -85  | 0.73 | 10827665 |                                                                         |
|                                               | ---                | -60  | 0.83 | 10798921 |                                                                         |

|     |     |      |          |  |
|-----|-----|------|----------|--|
| --- | -45 | 0.79 | 10932187 |  |
| --- | -41 | 0.77 | 10767747 |  |
| --- | -39 | 0.80 | 10726221 |  |
| --- | -35 | 0.82 | 10914901 |  |
| --- | -35 | 0.83 | 10803509 |  |
| --- | -34 | 0.66 | 10866205 |  |
| --- | -34 | 0.82 | 10760005 |  |
| --- | -31 | 0.69 | 10717085 |  |
| --- | -30 | 0.82 | 10888682 |  |
| --- | -28 | 0.80 | 10927840 |  |
| --- | -27 | 0.81 | 10795400 |  |
| --- | -21 | 0.82 | 10820761 |  |
| --- | -21 | 0.80 | 10750470 |  |
| --- | -14 | 0.83 | 10848414 |  |
| --- | -12 | 0.75 | 10873723 |  |
| --- | -10 | 0.82 | 10802574 |  |
| --- | -10 | 0.83 | 10813889 |  |
| --- | -10 | 0.83 | 10823935 |  |
| --- | -10 | 0.83 | 10877538 |  |
| --- | -9  | 0.81 | 10706465 |  |
| --- | -9  | 0.74 | 10841294 |  |
| --- | -8  | 0.82 | 10769229 |  |
| --- | -7  | 0.79 | 10740841 |  |
| --- | -5  | 0.80 | 10746914 |  |
| --- | 8   | 1.22 | 10711995 |  |
| --- | 8   | 1.33 | 10891491 |  |
| --- | 9   | 1.26 | 10744141 |  |
| --- | 11  | 1.24 | 10772782 |  |
| --- | 13  | 1.20 | 10778675 |  |
| --- | 13  | 1.21 | 10822356 |  |
| --- | 14  | 1.36 | 10896378 |  |
| --- | 14  | 1.28 | 10814299 |  |
| --- | 16  | 1.38 | 10877749 |  |
| --- | 21  | 1.33 | 10917344 |  |
| --- | 26  | 1.25 | 10909137 |  |
| --- | 27  | 1.21 | 10884820 |  |
| --- | 34  | 1.22 | 10826602 |  |
| --- | 44  | 1.40 | 10856228 |  |
| --- | 56  | 1.26 | 10714842 |  |
| --- | 184 | 1.25 | 10805225 |  |

**List 6. Genes Expressed Differentially in Stressed F3-Vinclozolin Rat Cortex Region as Compared to Stressed F3-Control ('St-Vin vs St-Con' contrast), 142 genes and EST's**

| <i>Gene Symbol</i>        | <i>GenBank_Reference Sequence</i> | <i>Mean_diff</i> | <i>Ratio</i> | <i>Affymetrix ID</i> | <i>Gene Title</i>              |
|---------------------------|-----------------------------------|------------------|--------------|----------------------|--------------------------------|
| <b>Development</b>        |                                   |                  |              |                      |                                |
| Robld3                    | NM_001106441                      | -30              | 0.78         | 10824344             | roadblock domain containing 3  |
| RGD1559751                | ENSRNOT00000058177                | -14              | 0.80         | 10805591             | similar to n-chimaerin         |
| Syt2                      | NM_012665                         | -84              | 0.83         | 10764174             | synaptotagmin II               |
| Vof16                     | NM_147207                         | 91               | 1.58         | 10909382             | ischemia related factor vof-16 |
| <b>Electron Transport</b> |                                   |                  |              |                      |                                |
| Gpx8                      | NM_001106411                      | 29               | 1.23         | 10821367             | glutathione peroxidase 8       |
| <b>Epigenetics</b>        |                                   |                  |              |                      |                                |
| LOC501799                 | ENSRNOT00000061397                | 100              | 1.38         | 10759844             | similar to chromobox homolog 3 |
| Hist1h2bc                 | NM_001109400                      | 44               | 1.34         | 10798475             | histone cluster 1, H2bc        |

|                                         |                    |     |      |          |                                                                                           |
|-----------------------------------------|--------------------|-----|------|----------|-------------------------------------------------------------------------------------------|
| Mkx                                     | ENSRNOT00000025623 | -24 | 0.82 | 10798902 | mohawk homeobox                                                                           |
| <b>Growth Factors</b>                   |                    |     |      |          |                                                                                           |
| Ctgf                                    | NM_022266          | 47  | 1.31 | 10717233 | connective tissue growth factor                                                           |
| Hdgf1                                   | NM_133549          | 12  | 1.24 | 10795072 | hepatoma derived growth factor-like 1                                                     |
| <b>Immune Response</b>                  |                    |     |      |          |                                                                                           |
| RT1-S2                                  | NM_001008857       | 15  | 1.35 | 10827789 | RT1 class Ib, locus S2                                                                    |
| Igha                                    | BC092592           | 20  | 1.34 | 10892572 | immunoglobulin heavy chain, alpha                                                         |
| <b>Metabolism &amp; Transport</b>       |                    |     |      |          |                                                                                           |
| Akr1c19                                 | NM_001100576       | 8   | 1.20 | 10796050 | aldo-keto reductase family 1, member C19                                                  |
| Cml1                                    | NM_021668          | -34 | 0.82 | 10863692 | camello-like 1                                                                            |
| Fth1                                    | BC081845           | 43  | 1.26 | 10713831 | ferritin, heavy polypeptide 1                                                             |
| Gnpat1                                  | NM_001134756       | 71  | 1.22 | 10782846 | glucosamine-phosphate N-acetyltransferase 1                                               |
| Hsd3b6                                  | NM_017265          | -27 | 0.82 | 10825349 | hydroxy-delta-5-steroid dehydrogenase, 3 beta- and steroid delta-isomerase 6              |
| Klk8                                    | NM_001107509       | -27 | 0.80 | 10706424 | kallikrein related-peptidase 8                                                            |
| Lrp1b                                   | NM_001107843       | 54  | 1.23 | 10844966 | low density lipoprotein-related protein 1B (deleted in tumors)                            |
| Piga                                    | NM_001108816       | 53  | 1.25 | 10937719 | phosphatidylinositol glycan anchor biosynthesis, class A                                  |
| Pln                                     | NM_022707          | 18  | 1.24 | 10830174 | phospholamban                                                                             |
| LOC679586                               | ENSRNOT00000048808 | -31 | 0.81 | 10920350 | similar to ATP synthase, H <sup>+</sup> transporting, mitochondrial F0 complex, subunit G |
| RGD1565045                              | ENSRNOT00000015997 | -11 | 0.81 | 10716502 | similar to carboxylesterase isoenzyme gene                                                |
| RGD1561777                              | ENSRNOT00000035047 | -31 | 0.76 | 10833617 | similar to Na <sup>+</sup> dependent glucose transporter 1                                |
| <b>Proteolysis</b>                      |                    |     |      |          |                                                                                           |
| Ube2n                                   | BC090072           | 26  | 1.42 | 10759435 | ubiquitin-conjugating enzyme E2N                                                          |
| <b>Receptors &amp; Binding Proteins</b> |                    |     |      |          |                                                                                           |
| Fabp7                                   | NM_030832          | 115 | 1.27 | 10830223 | fatty acid binding protein 7, brain                                                       |
| Hcrtr2                                  | NM_013074          | 22  | 1.20 | 10918761 | hypocretin (orexin) receptor 2                                                            |
| Igfbp6                                  | NM_013104          | -82 | 0.67 | 10899465 | insulin-like growth factor binding protein 6                                              |
| Lhcgr                                   | NM_012978          | -8  | 0.81 | 10888343 | luteinizing hormone                                                                       |
| Olr1199                                 | NM_001000819       | -19 | 0.77 | 10909109 | olfactory receptor 1199                                                                   |
| Olr1223                                 | NM_001000441       | 32  | 1.47 | 10909149 | olfactory receptor 1223                                                                   |
| Olr14                                   | NM_001000695       | 11  | 1.26 | 10723503 | olfactory receptor 14                                                                     |
| Olr1627                                 | NM_001000091       | -10 | 0.83 | 10779790 | olfactory receptor 1627                                                                   |
| Olr1701                                 | NM_001001114       | 41  | 1.21 | 10830802 | olfactory receptor 1701                                                                   |
| Olr421                                  | NM_001000824       | -14 | 0.80 | 10844764 | olfactory receptor 421                                                                    |
| Olr550                                  | NM_001000322       | -41 | 0.82 | 10847051 | olfactory receptor 550                                                                    |
| Olr850                                  | NM_001000401       | -5  | 0.82 | 10876763 | olfactory receptor 850                                                                    |
| LOC690821                               | ENSRNOT00000047245 | -9  | 0.82 | 10908225 | similar to olfactory receptor Olr1185                                                     |
| LOC304239                               | ENSRNOT00000049215 | 25  | 1.39 | 10834046 | similar to RalA binding protein 1                                                         |
| P2rx5                                   | NM_080780          | -19 | 0.83 | 10735647 | purinergic receptor P2X, ligand-gated ion channel, 5                                      |
| <b>Signaling</b>                        |                    |     |      |          |                                                                                           |
| Cyr61                                   | NM_031327          | 11  | 1.20 | 10827231 | cysteine-rich, angiogenic inducer, 61                                                     |
| Ibsp                                    | NM_012587          | -16 | 0.81 | 10775365 | integrin-binding sialoprotein                                                             |
| Pef1                                    | NM_001007651       | -28 | 0.76 | 10901111 | penta-EF hand domain containing 1                                                         |
| Plekho2                                 | ENSRNOT00000042633 | -47 | 0.78 | 10918288 | pleckstrin homology domain containing, family O member 2                                  |
| Prkacb                                  | NM_001077645       | -40 | 0.77 | 10827305 | protein kinase, cAMP dependent, catalytic, beta                                           |
| Pygm                                    | NM_012638          | -73 | 0.83 | 10713382 | phosphorylase, glycogen, muscle                                                           |
| Stk10                                   | NM_019206          | 48  | 1.25 | 10741887 | serine                                                                                    |
| Trib2                                   | NM_001108015       | -35 | 0.83 | 10889263 | tribbles homolog 2 (Drosophila)                                                           |

|                                               |                    |      |      |          |                                                       |
|-----------------------------------------------|--------------------|------|------|----------|-------------------------------------------------------|
| <b>Transcription</b>                          |                    |      |      |          |                                                       |
| Case5                                         | ENSRNOT00000067081 | -16  | 0.79 | 10838743 | cancer susceptibility candidate 5                     |
| Ccdc112                                       | NM_001109124       | 29   | 1.23 | 10804371 | coiled-coil domain containing 112                     |
| Ccdc153                                       | NM_001013953       | -14  | 0.78 | 10909463 | coiled-coil domain containing 153                     |
| Dpf3                                          | ENSRNOT00000010703 | -23  | 0.83 | 10891013 | D4, zinc and double PHD fingers, family 3             |
| Hlf                                           | ENSRNOT00000055664 | -41  | 0.81 | 10746209 | hepatic leukemia factor                               |
| Npas4                                         | NM_153626          | 192  | 1.53 | 10727717 | neuronal PAS domain protein 4                         |
| Nr4a2                                         | NM_019328          | 41   | 1.23 | 10845384 | nuclear receptor subfamily 4, group A, member 2       |
| Polr2j                                        | NM_001105921       | -36  | 0.82 | 10761070 | polymerase (RNA) II (DNA directed) polypeptide J      |
| Rprm                                          | NM_001044276       | 78   | 1.52 | 10845372 | reprimin, TP53 dependent G2 arrest mediator candidate |
| Txnip                                         | NM_001008767       | 170  | 1.48 | 10817552 | thioredoxin interacting protein                       |
| Zcche12                                       | NM_001014065       | 40   | 1.27 | 10936360 | zinc finger, CCHC domain containing 12                |
| Zfp280b                                       | NM_001106384       | -12  | 0.83 | 10832460 | zinc finger protein 280b                              |
| Zfp354a                                       | NM_052798          | -11  | 0.83 | 10733310 | zinc finger protein 354A                              |
| Zfpm2                                         | NM_001130501       | 32   | 1.24 | 10896337 | zinc finger protein, multitype 2                      |
| <b>Translation &amp; Protein Modification</b> |                    |      |      |          |                                                       |
| RGD1561635                                    | ENSRNOT00000032135 | -10  | 0.81 | 10764811 | similar to 40S ribosomal protein S17                  |
| RGD1564552                                    | ENSRNOT00000050803 | -45  | 0.80 | 10799888 | similar to ribosomal protein L21                      |
| <b>Miscellaneous &amp; Unknown</b>            |                    |      |      |          |                                                       |
| FAM50A                                        | NM_001170573       | 27   | 1.24 | 10940358 | family with sequence similarity 50, member A          |
| LOC680227                                     | NM_001047974       | -7   | 0.82 | 10934517 | LRRGT00193                                            |
| LOC100363176                                  | XM_002725742       | -43  | 0.75 | 10728981 | mCG145114-like                                        |
| Spetex-2A                                     | ENSRNOT00000061476 | 14   | 1.29 | 10782777 | Spetex-2B protein                                     |
| Trim59                                        | NM_001108945       | 29   | 1.21 | 10823591 | tripartite motif-containing 59                        |
| RGD1562420                                    | ENSRNOT00000007683 | -31  | 0.69 | 10887809 | similar to hypothetical protein                       |
| rno-mir-9-1                                   | rno-mir-9-1        | 36   | 1.24 | 10816485 |                                                       |
| <b>EST's</b>                                  |                    |      |      |          |                                                       |
| LOC500492                                     | XR_005747          | 30   | 1.22 | 10877982 |                                                       |
|                                               | NM_001111127       | 66   | 1.38 | 10798473 |                                                       |
|                                               | J01884             | -51  | 0.77 | 10830454 |                                                       |
|                                               | ENSRNOT00000057306 | -274 | 0.78 | 10815996 |                                                       |
|                                               | ENSRNOT00000054517 | -39  | 0.76 | 10797013 |                                                       |
|                                               | ENSRNOT00000053338 | -25  | 0.83 | 10791520 |                                                       |
|                                               | ENSRNOT00000053279 | -252 | 0.79 | 10708691 |                                                       |
|                                               | ENSRNOT00000053268 | 287  | 1.42 | 10909356 |                                                       |
|                                               | ENSRNOT00000053042 | 69   | 1.53 | 10937568 |                                                       |
|                                               | ENSRNOT00000052741 | 24   | 1.30 | 10726878 |                                                       |
|                                               | ENSRNOT00000052710 | -74  | 0.72 | 10838282 |                                                       |
|                                               | ENSRNOT00000025383 | 103  | 1.24 | 10920986 |                                                       |
|                                               | AF272707           | -22  | 0.80 | 10867318 |                                                       |
|                                               | AF188753           | -183 | 0.78 | 10855185 |                                                       |
|                                               | XR_005716          | -11  | 0.83 | 10875005 |                                                       |
|                                               | XM_221100          | 60   | 1.26 | 10748601 |                                                       |
|                                               | XR_006516          | -45  | 0.82 | 10759585 |                                                       |
|                                               | XR_006465          | -13  | 0.72 | 10902361 |                                                       |
|                                               | XR_005810          | -37  | 0.83 | 10849861 |                                                       |
|                                               | XR_007276          | -23  | 0.83 | 10933574 |                                                       |
|                                               | XR_007404          | -113 | 0.80 | 10845645 |                                                       |
|                                               | XM_001066244       | -44  | 0.82 | 10905605 |                                                       |
|                                               | ---                | -621 | 0.81 | 10761253 |                                                       |
|                                               | ---                | -411 | 0.75 | 10758031 |                                                       |

|     |     |      |          |  |
|-----|-----|------|----------|--|
| --- | -91 | 0.79 | 10898938 |  |
| --- | -58 | 0.81 | 10937523 |  |
| --- | -52 | 0.74 | 10935698 |  |
| --- | -47 | 0.81 | 10729345 |  |
| --- | -44 | 0.71 | 10774100 |  |
| --- | -43 | 0.73 | 10713873 |  |
| --- | -42 | 0.78 | 10758033 |  |
| --- | -37 | 0.76 | 10883797 |  |
| --- | -35 | 0.80 | 10845397 |  |
| --- | -35 | 0.78 | 10759465 |  |
| --- | -26 | 0.75 | 10767278 |  |
| --- | -22 | 0.76 | 10903965 |  |
| --- | -20 | 0.77 | 10836352 |  |
| --- | -18 | 0.82 | 10718598 |  |
| --- | -16 | 0.82 | 10820280 |  |
| --- | -13 | 0.82 | 10840477 |  |
| --- | -13 | 0.79 | 10800629 |  |
| --- | -10 | 0.82 | 10937800 |  |
| --- | -10 | 0.83 | 10842472 |  |
| --- | -10 | 0.79 | 10871417 |  |
| --- | -8  | 0.83 | 10882530 |  |
| --- | -7  | 0.75 | 10902418 |  |
| --- | -6  | 0.82 | 10723555 |  |
| --- | 8   | 1.34 | 10925452 |  |
| --- | 9   | 1.22 | 10927207 |  |
| --- | 10  | 1.24 | 10759459 |  |
| --- | 18  | 1.26 | 10846962 |  |
| --- | 18  | 1.36 | 10925371 |  |
| --- | 18  | 1.25 | 10720518 |  |
| --- | 19  | 1.40 | 10908227 |  |
| --- | 20  | 1.24 | 10830161 |  |
| --- | 26  | 1.23 | 10900073 |  |
| --- | 26  | 1.42 | 10756268 |  |
| --- | 26  | 1.42 | 10756270 |  |
| --- | 26  | 1.42 | 10756272 |  |
| --- | 26  | 1.42 | 10759445 |  |
| --- | 29  | 1.52 | 10865347 |  |
| --- | 32  | 1.37 | 10726672 |  |
| --- | 36  | 1.22 | 10924669 |  |
| --- | 36  | 1.20 | 10843845 |  |
| --- | 50  | 1.40 | 10765036 |  |
| --- | 50  | 1.20 | 10828841 |  |
| --- | 64  | 1.25 | 10815955 |  |
| --- | 73  | 1.45 | 10939061 |  |
| --- | 172 | 1.22 | 10748763 |  |
| --- | 237 | 1.52 | 10752799 |  |
| --- | 257 | 1.32 | 10718134 |  |

**List 7. Genes Expressed Differentially in Stressed F3-Control Rat Cortex Region as Compared to Non-Stressed F3-Control ('Str-Con vs Nst-Con' contrast), 290 genes and EST's**

| <i>Gene Symbol</i> | <i>GenBank_Reference Sequence</i> | <i>Mean_diff</i> | <i>Ratio</i> | <i>Affymetrix ID</i> | <i>Gene Title</i>                                     |
|--------------------|-----------------------------------|------------------|--------------|----------------------|-------------------------------------------------------|
| <b>Apoptosis</b>   |                                   |                  |              |                      |                                                       |
| Tnfaip81l          | XM_236787                         | -23              | 0.81         | 10931477             | tumor necrosis factor, alpha-induced protein 8-like 1 |
| <b>Cell Cycle</b>  |                                   |                  |              |                      |                                                       |
| Ccne2              | NM_001108656                      | -15              | 0.81         | 10867614             | cyclin E2                                             |

|                           |                    |      |      |          |                                                                                                                 |
|---------------------------|--------------------|------|------|----------|-----------------------------------------------------------------------------------------------------------------|
| Fcho2                     | ENSRNOT00000020692 | -88  | 0.82 | 10820770 | FCH domain only 2                                                                                               |
| RGD1562871                | NM_001106935       | -15  | 0.83 | 10934664 | similar to BMI1-like protein                                                                                    |
| <b>Cytoskeleton-ECM</b>   |                    |      |      |          |                                                                                                                 |
| Afap1                     | NM_080900          | 17   | 1.28 | 10777450 | actin filament associated protein 1                                                                             |
| Capza1                    | NM_001109625       | -143 | 0.82 | 10825686 | capping protein (actin filament) muscle Z-line, alpha 1                                                         |
| Ceacam11                  | NM_001025404       | 9    | 1.26 | 10704634 | carcinoembryonic antigen-related cell adhesion molecule 11                                                      |
| Cspg4                     | NM_031022          | -31  | 0.77 | 10910237 | chondroitin sulfate proteoglycan 4                                                                              |
| Cldn16                    | NM_131905          | -7   | 0.82 | 10755027 | claudin 16                                                                                                      |
| Emilin1                   | NM_001106710       | -20  | 0.82 | 10888953 | elastin microfibril interfacier 1                                                                               |
| Gm52                      | NM_001014771       | -27  | 0.78 | 10757808 | envelope glycoprotein syncytin-A                                                                                |
| Krtap4-7                  | ENSRNOT00000068237 | -53  | 0.69 | 10747166 | keratin associated protein 4-5                                                                                  |
| Nvl                       | NM_001105980       | -44  | 0.78 | 10770351 | nuclear VCP-like                                                                                                |
| Papln                     | NM_001108039       | -16  | 0.81 | 10885823 | papilin, proteoglycan-like sulfated glycoprotein                                                                |
| Pcdh19                    | NM_001169129       | 32   | 1.21 | 10939226 | protocadherin 19                                                                                                |
| RGD1564515                | ENSRNOT00000056894 | -10  | 0.80 | 10896803 | similar to alpha 1B-glycoprotein                                                                                |
| RGD1564955                | ENSRNOT00000033044 | 7    | 1.23 | 10939640 | similar to fibrous sheath interacting protein 2                                                                 |
| RGD1309537                | NM_001135017       | 38   | 1.26 | 10930421 | similar to Myosin regulatory light chain 2-A, smooth muscle isoform (Myosin RLC-A)                              |
| LOC290704                 | ENSRNOT00000059673 | -9   | 0.79 | 10787918 | similar to palladin                                                                                             |
| Smtnl1                    | ENSRNOT00000009903 | 19   | 1.21 | 10846862 | smoothelin-like 1                                                                                               |
| Tpm2                      | NM_001024345       | 18   | 1.23 | 10876324 | tropomyosin 2, beta                                                                                             |
| <b>Development</b>        |                    |      |      |          |                                                                                                                 |
| Egln2                     | NM_001004083       | 59   | 1.23 | 10719958 | EGL nine homolog 2 (C. elegans)                                                                                 |
| Fanc1                     | ENSRNOT00000029513 | -23  | 0.72 | 10774612 | Fanconi anemia, complementation group L                                                                         |
| Figl2                     | ENSRNOT00000044982 | 38   | 1.23 | 10907335 | fidgetin-like 2                                                                                                 |
| LOC681385                 | ENSRNOT00000067576 | 10   | 1.35 | 10843857 | similar to Vomeronasal secretory protein 2 precursor (Vomeronasal secretory protein II) (VNSP II) (Lipocalin-4) |
| LOC685226                 | ENSRNOT00000045972 | 60   | 1.67 | 10806527 | similar to spermatogenesis associated glutamate (E)-rich protein 4d                                             |
| LOC687994                 | ENSRNOT00000030501 | -56  | 0.83 | 10867109 | similar to 82-kD FMRP Interacting Protein                                                                       |
| Olfml1                    | NM_001013192       | -85  | 0.75 | 10709687 | olfactomedin-like 1                                                                                             |
| Polr3k                    | NM_001014259       | -186 | 0.77 | 10843132 | polymerase (RNA) III (DNA directed) polypeptide K                                                               |
| Retnlg                    | NM_181625          | 10   | 1.22 | 10753861 | resistin-like gamma                                                                                             |
| Spata4                    | NM_001002852       | 6    | 1.22 | 10793083 | spermatogenesis associated 4                                                                                    |
| Sytl5                     | NM_178333          | 22   | 1.21 | 10936877 | synaptotagmin-like 5                                                                                            |
| Trpa1                     | NM_207608          | -9   | 0.79 | 10867111 | transient receptor potential cation channel, subfamily A, member 1                                              |
| Wbscr27                   | NM_001109499       | -24  | 0.76 | 10761247 | Williams Beuren syndrome chromosome region 27                                                                   |
| <b>Electron Transport</b> |                    |      |      |          |                                                                                                                 |
| Cox6c1                    | NM_173303          | -22  | 0.78 | 10811879 | cytochrome c oxidase subunit VIc-1                                                                              |
| Cyp2j3                    | NM_175766          | 27   | 1.21 | 10878170 | cytochrome P450, family 2, subfamily j, polypeptide 3                                                           |
| Piwil2                    | NM_001107276       | -18  | 0.81 | 10785031 | piwi-like 2 (Drosophila)                                                                                        |
| <b>Epigenetics</b>        |                    |      |      |          |                                                                                                                 |
| As3mt                     | NM_080890          | -12  | 0.80 | 10715875 | arsenic (+3 oxidation state) methyltransferase                                                                  |
| Dmap1                     | NM_001015006       | -22  | 0.80 | 10938804 | DNA methyltransferase 1-associated protein 1                                                                    |
| Hist2h2bb                 | ENSRNOT00000042005 | 50   | 1.27 | 10817539 | histone cluster 2, H2bb                                                                                         |
| Hist2h4                   | NM_001123469       | 173  | 1.37 | 10825151 | histone cluster 2, H4                                                                                           |
| Hist3h2bb                 | NM_001109641       | 9    | 1.21 | 10742987 | histone cluster 3, H2bb                                                                                         |
| Hmgb2                     | NM_017187          | 8    | 1.26 | 10791497 | high mobility group box 2                                                                                       |
| <b>Golgi</b>              |                    |      |      |          |                                                                                                                 |



|                                   |                    |      |      |          |                                                                                  |
|-----------------------------------|--------------------|------|------|----------|----------------------------------------------------------------------------------|
| <b>Apparatus</b>                  |                    |      |      |          |                                                                                  |
| Rgp1                              | ENSRNOT00000064419 | 53   | 1.21 | 10868541 | RGP1 retrograde golgi transport homolog (S. cerevisiae)                          |
| <b>Growth Factors</b>             |                    |      |      |          |                                                                                  |
| Amh                               | NM_012902          | 15   | 1.26 | 10900405 | anti-Mullerian hormone                                                           |
| Artn                              | NM_053397          | -14  | 0.79 | 10879084 | artemin                                                                          |
| Edn2                              | NM_012549          | -12  | 0.80 | 10871623 | endothelin 2                                                                     |
| Ccr9                              | NM_172329          | 8    | 1.20 | 10914601 | chemokine (C-C motif) receptor 9                                                 |
| Il18                              | NM_019165          | -16  | 0.81 | 10909874 | interleukin 18                                                                   |
| Ing5                              | NM_001108810       | -18  | 0.83 | 10925660 | inhibitor of growth family, member 5                                             |
| <b>Hormones</b>                   |                    |      |      |          |                                                                                  |
| Pth                               | NM_017044          | 14   | 1.25 | 10724987 | parathyroid hormone                                                              |
| <b>Immune Response</b>            |                    |      |      |          |                                                                                  |
| Obp3                              | NM_147215          | 9    | 1.21 | 10877229 | alpha-2u globulin PGCL4                                                          |
| C4bpa                             | NM_012516          | -8   | 0.82 | 10767422 | complement component 4 binding protein, alpha                                    |
| Ly6b                              | NM_139257          | 8    | 1.34 | 10904590 | lymphocyte antigen 6 complex, locus B                                            |
| Mup4                              | NM_198784          | 11   | 1.21 | 10877251 | major urinary protein 4                                                          |
| RT1-CE2                           | NM_001008840       | 22   | 1.50 | 10831129 | RT1 class I, locus CE2                                                           |
| RT1-S2                            | NM_001008857       | -21  | 0.67 | 10827789 | RT1 class Ib, locus S2                                                           |
| Slamf9                            | NM_001105971       | -16  | 0.77 | 10765746 | SLAM family member 9                                                             |
| <b>Metabolism &amp; Transport</b> |                    |      |      |          |                                                                                  |
| Aadacl2                           | ENSRNOT00000067870 | 7    | 1.25 | 10815616 | arylacetamide deacetylase-like 2                                                 |
| Abhd1                             | NM_001008520       | 54   | 1.28 | 10888931 | abhydrolase domain containing 1                                                  |
| Acot1                             | NM_031315          | 6    | 1.24 | 10885857 | acyl-CoA thioesterase 1                                                          |
| Akr1b7                            | NM_053781          | 9    | 1.31 | 10854427 | aldo-keto reductase family 1, member B7                                          |
| Akr1d1                            | NM_138884          | -15  | 0.78 | 10854548 | aldo-keto reductase family 1, member D1 (delta 4-3-ketosteroid-5-beta-reductase) |
| Apoa2                             | NM_013112          | -19  | 0.82 | 10765530 | apolipoprotein A-II                                                              |
| Apool                             | NM_001014105       | -26  | 0.79 | 10934700 | apolipoprotein O-like                                                            |
| Bphl                              | NM_001037206       | 16   | 1.28 | 10798100 | biphenyl hydrolase-like (serine hydrolase)                                       |
| Coq10b                            | NM_001009671       | -88  | 0.76 | 10923338 | coenzyme Q10 homolog B (S. cerevisiae)                                           |
| Dhrs7c                            | ENSRNOT00000036752 | -8   | 0.79 | 10734701 | dehydrogenase                                                                    |
| Eno3                              | NM_012949          | 15   | 1.23 | 10735331 | enolase 3, beta, muscle                                                          |
| Fth1                              | BC081845           | -52  | 0.76 | 10713831 | ferritin, heavy polypeptide 1                                                    |
| Gnpnat1                           | NM_001134756       | -82  | 0.80 | 10782846 | glucosamine-phosphate N-acetyltransferase 1                                      |
| Guf1                              | NM_001107215       | -89  | 0.82 | 10776646 | GUF1 GTPase homolog (S. cerevisiae)                                              |
| Gykl1                             | NM_134341          | 13   | 1.31 | 10801717 | glycerol kinase-like 1                                                           |
| Klk1c10                           | NM_001135173       | -22  | 0.74 | 10721283 | T-kininogenase                                                                   |
| Lrp1b                             | NM_001107843       | -207 | 0.79 | 10844988 | low density lipoprotein-related protein 1B (deleted in tumors)                   |
| Mgst1                             | NM_134349          | 28   | 1.25 | 10859392 | microsomal glutathione S-transferase 1                                           |
| Pigw                              | NM_194461          | -43  | 0.83 | 10745782 | phosphatidylinositol glycan anchor biosynthesis, class W                         |
| Plch1                             | ENSRNOT00000013280 | 8    | 1.21 | 10823432 | phospholipase C, eta 1                                                           |
| RGD1561057                        | ENSRNOT00000043238 | 7    | 1.23 | 10846671 | ceramide kinase-like                                                             |
| RGD1561777                        | ENSRNOT00000035047 | 28   | 1.28 | 10833617 | similar to Na+ dependent glucose transporter 1                                   |
| Scd4                              | ENSRNOT00000017834 | 40   | 1.20 | 10715552 | stearoyl-coenzyme A desaturase 4                                                 |
| Slc10a4                           | NM_001008555       | -20  | 0.79 | 10776582 | solute carrier family 10 (sodium                                                 |
| <b>Proteolysis</b>                |                    |      |      |          |                                                                                  |
| Adamts14                          | NM_001034012       | -13  | 0.78 | 10833985 | ADAMTS-like 4                                                                    |
| Agt                               | NM_134432          | 92   | 1.34 | 10811900 | angiotensinogen (serpin peptidase inhibitor, clade A, member 8)                  |
| Hpn                               | NM_017112          | -12  | 0.82 | 10720891 | hepsin                                                                           |
| Pomp                              | NM_001100942       | 43   | 1.28 | 10760041 | proteasome maturation protein                                                    |

|                                         |                    |     |      |          |                                                                                                                          |
|-----------------------------------------|--------------------|-----|------|----------|--------------------------------------------------------------------------------------------------------------------------|
| Psmg4                                   | NM_001129879       | -17 | 0.82 | 10798096 | proteasome (prosome, macropain) assembly chaperone 4                                                                     |
| Rnf113a1                                | NM_001014791       | -15 | 0.82 | 10936285 | ring finger protein 113A1                                                                                                |
| Rnft1                                   | ENSRNOT00000005064 | -93 | 0.81 | 10737380 | ring finger protein, transmembrane 1                                                                                     |
| Usp30                                   | NM_001107153       | 44  | 1.26 | 10762857 | ubiquitin specific peptidase 30                                                                                          |
| <b>Receptors &amp; Binding Proteins</b> |                    |     |      |          |                                                                                                                          |
| Abca17                                  | NM_001031637       | 8   | 1.22 | 10741044 | ATP-binding cassette, sub-family A (ABC1), member 17                                                                     |
| Acvr2b                                  | NM_031554          | 10  | 1.23 | 10914230 | activin A receptor, type IIB                                                                                             |
| Gpr179                                  | ENSRNOT00000055427 | -11 | 0.79 | 10746701 | G protein-coupled receptor 179                                                                                           |
| Lilrb3                                  | NM_031713          | -12 | 0.82 | 10703666 | leukocyte immunoglobulin-like receptor, subfamily B (with TM and ITIM domains), member 3                                 |
| Ly49i6                                  | NM_001009718       | 8   | 1.28 | 10866207 | Ly49 inhibitory receptor 6                                                                                               |
| Mtnr1b                                  | NM_001100641       | -12 | 0.83 | 10915124 | melatonin receptor 1B                                                                                                    |
| Olr1060                                 | NM_001000698       | 29  | 1.74 | 10900087 | olfactory receptor 1060                                                                                                  |
| Olr1297                                 | NM_001000461       | 17  | 1.24 | 10916342 | olfactory receptor 1297                                                                                                  |
| Olr130                                  | NM_001001272       | -13 | 0.76 | 10724337 | olfactory receptor 130                                                                                                   |
| Olr1431                                 | NM_001000778       | -15 | 0.80 | 10733862 | olfactory receptor 1431                                                                                                  |
| Olr1567                                 | NM_001000043       | 11  | 1.25 | 10752235 | olfactory receptor 1567                                                                                                  |
| Olr1607                                 | NM_001000534       | -21 | 0.80 | 10779355 | olfactory receptor 1607                                                                                                  |
| Olr1664                                 | NM_001001007       | 8   | 1.22 | 10795357 | olfactory receptor 1664                                                                                                  |
| Olr222                                  | NM_001000201       | -22 | 0.76 | 10724611 | olfactory receptor 222                                                                                                   |
| Olr29                                   | NM_001000691       | 22  | 1.34 | 10723519 | olfactory receptor 29                                                                                                    |
| Olr315                                  | NM_001000243       | 23  | 1.25 | 10712086 | olfactory receptor 315                                                                                                   |
| Olr485                                  | NM_001000307       | -8  | 0.82 | 10846958 | olfactory receptor 485                                                                                                   |
| Olr551                                  | NM_001000670       | -12 | 0.76 | 10847053 | olfactory receptor 551                                                                                                   |
| Olr664                                  | NM_001000347       | 11  | 1.20 | 10837619 | olfactory receptor 664                                                                                                   |
| Olr703                                  | NM_001000359       | 8   | 1.24 | 10847193 | olfactory receptor 703                                                                                                   |
| Olr771                                  | NM_001000610       | -22 | 0.74 | 10838435 | olfactory receptor 771                                                                                                   |
| Olr813                                  | NM_001000846       | -6  | 0.82 | 10855100 | olfactory receptor 813                                                                                                   |
| Olr830                                  | NM_001000900       | 11  | 1.26 | 10858158 | olfactory receptor 830                                                                                                   |
| Olr855                                  | NM_001000409       | -9  | 0.82 | 10871502 | olfactory receptor 855                                                                                                   |
| Olr862                                  | NM_001001071       | -27 | 0.81 | 10879329 | olfactory receptor 862                                                                                                   |
| Olr905                                  | NM_001001355       | 19  | 1.20 | 10893392 | olfactory receptor 905                                                                                                   |
| Olr93                                   | NM_001000141       | -20 | 0.78 | 10724262 | olfactory receptor 93                                                                                                    |
| P2rx7                                   | NM_019256          | -20 | 0.81 | 10761992 | purinergic receptor P2X, ligand-gated ion channel, 7                                                                     |
| Prokr2                                  | NM_138978          | -16 | 0.81 | 10850137 | prokineticin receptor 2                                                                                                  |
| PVR                                     | NM_017076          | -12 | 0.82 | 10719616 | poliovirus receptor                                                                                                      |
| V1rc28                                  | NM_001009513       | 17  | 1.20 | 10855844 | vomer nasal 1 receptor, C28                                                                                              |
| V1rd6                                   | NM_001008923       | 6   | 1.20 | 10703890 | vomer nasal 1 receptor, D6                                                                                               |
| Vom2r7                                  | NM_001099463       | 10  | 1.27 | 10703233 | vomer nasal 2 receptor, 7                                                                                                |
| Vom2r-ps53                              | ENSRNOT00000012225 | 12  | 1.25 | 10719051 | vomer nasal 2 receptor, pseudogene 53                                                                                    |
| <b>Signaling</b>                        |                    |     |      |          |                                                                                                                          |
| Akap14                                  | NM_021703          | 8   | 1.24 | 10931995 | A kinase (PRKA) anchor protein 14                                                                                        |
| Chka                                    | NM_017127          | -48 | 0.83 | 10712706 | choline kinase alpha                                                                                                     |
| Frmpl1                                  | NM_001107937       | 25  | 1.23 | 10868693 | FERM and PDZ domain containing 1                                                                                         |
| Grtp1                                   | ENSRNOT00000057740 | -15 | 0.82 | 10789500 | growth hormone regulated TBC protein 1                                                                                   |
| Gna15                                   | NM_053542          | 8   | 1.20 | 10893474 | guanine nucleotide binding protein, alpha 15                                                                             |
| Gnas                                    | NM_001159653       | -7  | 0.83 | 10842657 | GNAS complex locus                                                                                                       |
| LOC689617                               | ENSRNOT00000058250 | 64  | 1.63 | 10815215 | similar to GTPase activating protein testicular GAP1 menage a trois homolog 1, cyclin H assembly factor (Xenopus laevis) |
| Mnat1                                   | NM_153472          | -32 | 0.80 | 10885207 | menage a trois homolog 1, cyclin H assembly factor (Xenopus laevis)                                                      |
| Mrgprb4                                 | ENSRNOT00000045792 | -42 | 0.73 | 10722218 | MAS-related GPR, member B4                                                                                               |
| Musk                                    | NM_031061          | -17 | 0.80 | 10869213 | muscle, skeletal, receptor tyrosine kinase                                                                               |

|                                               |                    |      |      |          |                                                                                                                                                              |
|-----------------------------------------------|--------------------|------|------|----------|--------------------------------------------------------------------------------------------------------------------------------------------------------------|
| Pih1d1                                        | NM_001024868       | -14  | 0.79 | 10706724 | PIH1 domain containing 1                                                                                                                                     |
| RGD1561231                                    | ENSRNOT00000047232 | 12   | 1.21 | 10795701 | similar to MAP                                                                                                                                               |
| Socs6                                         | ENSRNOT00000058179 | -25  | 0.81 | 10805585 | suppressor of cytokine signaling 6                                                                                                                           |
| Sppl2a                                        | NM_001107770       | -110 | 0.82 | 10849598 | signal peptide peptidase-like 2A                                                                                                                             |
| Susd5                                         | ENSRNOT00000028675 | -13  | 0.83 | 10913963 | sushi domain containing 5                                                                                                                                    |
| <b>Transcription</b>                          |                    |      |      |          |                                                                                                                                                              |
| Bwk1                                          | NM_198743          | -72  | 0.83 | 10842879 | Bwk1 leukemia-related gene                                                                                                                                   |
| Cass4                                         | ENSRNOT00000035245 | -13  | 0.82 | 10842525 | Cas scaffolding protein family member 4                                                                                                                      |
| Ccdc114                                       | NM_001126277       | -10  | 0.82 | 10707003 | coiled-coil domain containing 114                                                                                                                            |
| Ccdc153                                       | NM_001013953       | 15   | 1.30 | 10909463 | coiled-coil domain containing 153                                                                                                                            |
| Dmrt2                                         | NM_001107951       | 9    | 1.22 | 10870971 | DMRT-like family A2                                                                                                                                          |
| Duxbl                                         | ENSRNOT00000052224 | 11   | 1.21 | 10786197 | double homeobox B-like                                                                                                                                       |
| Gtf2h4                                        | NM_212501          | 29   | 1.24 | 10827936 | general transcription factor II H, polypeptide 4                                                                                                             |
| Hoxd10                                        | NM_001107094       | -28  | 0.81 | 10837003 | homeo box D10                                                                                                                                                |
| Hrasls                                        | NM_001105871       | 31   | 1.20 | 10754987 | HRAS-like suppressor                                                                                                                                         |
| Lmx1a                                         | NM_001105967       | -12  | 0.81 | 10765424 | LIM homeobox transcription factor 1 alpha                                                                                                                    |
| LOC499110                                     | ENSRNOT00000041861 | 27   | 1.21 | 10705431 | similar to Zinc finger protein 354A (Transcription factor 17) (Renal transcription factor Kid-1) (Kidney, ischemia, and developmentally regulated protein 1) |
| Nusap1                                        | NM_001107762       | -10  | 0.81 | 10838843 | nucleolar and spindle associated protein 1                                                                                                                   |
| Rfx6                                          | NM_001106388       | 12   | 1.21 | 10830105 | regulatory factor X, 6                                                                                                                                       |
| RGD1563034                                    | ENSRNOT00000021187 | 8    | 1.28 | 10719719 | similar to ETS domain transcription factor ERF (Ets2 repressor factor)                                                                                       |
| Srfbp1                                        | NM_001005536       | -27  | 0.83 | 10801698 | serum response factor binding protein 1                                                                                                                      |
| RGD1564386                                    | XM_001074961       | 8    | 1.20 | 10824792 | similar to TDPOZ3                                                                                                                                            |
| Zfp278                                        | NM_001107231       | 9    | 1.23 | 10773683 | zinc finger protein 278                                                                                                                                      |
| Znf295                                        | NM_001107105       | -35  | 0.78 | 10753513 | zinc finger protein 295                                                                                                                                      |
| Znf307                                        | ENSRNOT00000024797 | -20  | 0.82 | 10798513 | zinc finger protein 307                                                                                                                                      |
| Ddx18                                         | NM_001006996       | -37  | 0.81 | 10767189 | DEAD (Asp-Glu-Ala-Asp) box polypeptide 18                                                                                                                    |
| <b>Translation &amp; Protein Modification</b> |                    |      |      |          |                                                                                                                                                              |
| LOC681338                                     | ENSRNOT00000047517 | 5    | 1.24 | 10928032 | similar to ribosomal protein L31                                                                                                                             |
| LOC683597                                     | ENSRNOT00000030099 | -9   | 0.83 | 10877637 | similar to ribosomal protein L9                                                                                                                              |
| Mtrf11                                        | NM_001025723       | -33  | 0.82 | 10717785 | mitochondrial translational release factor 1-like                                                                                                            |
| RGD1564062                                    | ENSRNOT00000033738 | -48  | 0.76 | 10798841 | similar to ribosomal protein L27a                                                                                                                            |
| RGD1564552                                    | ENSRNOT00000050803 | -89  | 0.72 | 10799888 | similar to ribosomal protein L21                                                                                                                             |
| Mrpl1                                         | NM_001105997       | -52  | 0.83 | 10775719 | mitochondrial ribosomal protein L1                                                                                                                           |
| Rpl3                                          | NM_198753          | 203  | 1.27 | 10905530 | ribosomal protein L3                                                                                                                                         |
| Rps9                                          | NM_031108          | 184  | 1.26 | 10718510 | ribosomal protein S9                                                                                                                                         |
| Taf9                                          | NM_001037310       | -62  | 0.83 | 10812748 | TAF9 RNA polymerase II, TATA box binding protein (TBP)-associated factor                                                                                     |
| <b>Miscellaneous &amp; Unknown</b>            |                    |      |      |          |                                                                                                                                                              |
| Fam133b                                       | BC094528           | -57  | 0.65 | 10936823 | family with sequence similarity 133, member B                                                                                                                |
| LOC686013                                     | ENSRNOT00000007407 | 6    | 1.24 | 10810203 | hypothetical protein LOC686013                                                                                                                               |
| LOC689425                                     | NM_001135002       | -16  | 0.82 | 10828752 | hypothetical protein LOC689425                                                                                                                               |
| LOC690206                                     | NM_001109567       | -20  | 0.75 | 10873029 | hypothetical protein LOC690206                                                                                                                               |
| LOC690422                                     | ENSRNOT00000029223 | -10  | 0.83 | 10887627 | hypothetical protein LOC690422                                                                                                                               |
| LOC499542                                     | NM_001047943       | 9    | 1.21 | 10821984 | LRRGT00178                                                                                                                                                   |
| Rwdd2a                                        | NM_001108773       | -8   | 0.79 | 10912048 | RWD domain containing 2A                                                                                                                                     |
| RGD1561161                                    | NM_001134510       | -11  | 0.80 | 10813119 | similar to BC067074 protein                                                                                                                                  |
| RGD1565493                                    | XM_002729803       | -24  | 0.82 | 10903288 | similar to DKFZP434I092 protein                                                                                                                              |
| RGD1310587                                    | NM_001100857       | -19  | 0.80 | 10770517 | similar to hypothetical protein FLJ14146                                                                                                                     |
| RGD1562310                                    | NM_001109066       | 16   | 1.24 | 10762420 | similar to hypothetical protein FLJ21415                                                                                                                     |
| RGD1311269                                    | NR_033170          | 28   | 1.24 | 10928207 | similar to hypothetical protein FLJ37953                                                                                                                     |
| RGD1308165                                    | NM_001108664       | -27  | 0.83 | 10868982 | similar to hypothetical protein MGC17337                                                                                                                     |

|             |                    |      |      |          |                                                                  |
|-------------|--------------------|------|------|----------|------------------------------------------------------------------|
| RGD1562039  | ENSRNOT00000049790 | 30   | 1.21 | 10939072 | similar to MGC82337 protein                                      |
| RGD1563945  | ENSRNOT00000061140 | -21  | 0.82 | 10936645 | similar to mKIAA0215 protein                                     |
| RGD1560291  | XM_001078928       | -13  | 0.81 | 10901121 | similar to NACHT, leucine rich repeat and PYD containing 4A      |
| LOC501427   | ENSRNOT00000061060 | -12  | 0.77 | 10779531 | similar to Spetex-2F protein                                     |
| Samd12      | NM_001130562       | -85  | 0.81 | 10903721 | sterile alpha motif domain containing 12                         |
| Ttc36       | NM_001005546       | -38  | 0.77 | 10916876 | tetratricopeptide repeat domain 36                               |
| Tmco5a      | ENSRNOT00000006809 | 11   | 1.22 | 10838571 | transmembrane and coiled-coil domains 5A                         |
| Tmem156     | NM_001025138       | 9    | 1.25 | 10772760 | transmembrane protein 156                                        |
| Utp23       | NM_001126266       | -23  | 0.82 | 10896499 | UTP23, small subunit (SSU) processome component, homolog (yeast) |
| <b>ESTs</b> |                    |      |      |          |                                                                  |
| MGC94199    | BC079168           | -64  | 0.80 | 10867596 | similar to RIKEN cDNA 2610301B20; EST AI428449                   |
| RGD1308251  | NM_001108697       | 44   | 1.26 | 10882071 | similar to RIKEN cDNA 2810405K02                                 |
|             | XR_009246          | 17   | 1.40 | 10731555 |                                                                  |
|             | XR_008340          | -68  | 0.71 | 10717829 |                                                                  |
|             | XR_008339          | -56  | 0.60 | 10845365 |                                                                  |
|             | XR_008033          | -7   | 0.79 | 10796881 |                                                                  |
|             | XR_007931          | -50  | 0.78 | 10836964 |                                                                  |
|             | XR_007585          | 35   | 1.56 | 10934560 |                                                                  |
|             | XR_007179          | -25  | 0.78 | 10830126 |                                                                  |
|             | XR_007098          | -37  | 0.62 | 10707370 |                                                                  |
|             | XR_006082          | 6    | 1.25 | 10934692 |                                                                  |
|             | XR_006046          | -35  | 0.75 | 10703137 |                                                                  |
|             | XR_005716          | 23   | 1.58 | 10875005 |                                                                  |
|             | XM_001074777       | -170 | 0.73 | 10721276 |                                                                  |
|             | ENSRNOT00000056786 | -124 | 0.54 | 10939699 |                                                                  |
|             | ENSRNOT00000055830 | 22   | 1.34 | 10859174 |                                                                  |
|             | ENSRNOT00000042423 | 31   | 1.27 | 10938712 |                                                                  |
|             | ENSRNOT00000002166 | -5   | 0.82 | 10836988 |                                                                  |
|             | AF272707           | 34   | 1.45 | 10867318 |                                                                  |
|             | ENSRNOT00000009117 | -13  | 0.77 | 10867916 |                                                                  |
|             | ---                | -173 | 0.83 | 10732837 |                                                                  |
|             | ---                | -141 | 0.76 | 10805311 |                                                                  |
|             | ---                | -130 | 0.70 | 10742507 |                                                                  |
|             | ---                | -106 | 0.66 | 10827665 |                                                                  |
|             | ---                | -93  | 0.73 | 10848956 |                                                                  |
|             | ---                | -84  | 0.64 | 10903520 |                                                                  |
|             | ---                | -80  | 0.83 | 10768364 |                                                                  |
|             | ---                | -79  | 0.77 | 10798921 |                                                                  |
|             | ---                | -73  | 0.79 | 10934980 |                                                                  |
|             | ---                | -69  | 0.80 | 10810417 |                                                                  |
|             | ---                | -66  | 0.78 | 10817114 |                                                                  |
|             | ---                | -64  | 0.82 | 10833808 |                                                                  |
|             | ---                | -64  | 0.59 | 10914009 |                                                                  |
|             | ---                | -52  | 0.77 | 10723231 |                                                                  |
|             | ---                | -47  | 0.81 | 10932054 |                                                                  |
|             | ---                | -44  | 0.82 | 10716630 |                                                                  |
|             | ---                | -41  | 0.67 | 10830161 |                                                                  |
|             | ---                | -39  | 0.80 | 10914901 |                                                                  |
|             | ---                | -38  | 0.61 | 10866205 |                                                                  |
|             | ---                | -38  | 0.73 | 10795400 |                                                                  |
|             | ---                | -27  | 0.80 | 10877992 |                                                                  |
|             | ---                | -25  | 0.79 | 10818137 |                                                                  |

|  |     |     |      |          |  |
|--|-----|-----|------|----------|--|
|  | --- | -19 | 0.79 | 10840363 |  |
|  | --- | -19 | 0.78 | 10713011 |  |
|  | --- | -18 | 0.77 | 10724240 |  |
|  | --- | -17 | 0.65 | 10873723 |  |
|  | --- | -16 | 0.76 | 10732217 |  |
|  | --- | -15 | 0.76 | 10725541 |  |
|  | --- | -15 | 0.77 | 10925371 |  |
|  | --- | -14 | 0.78 | 10824526 |  |
|  | --- | -12 | 0.82 | 10892481 |  |
|  | --- | -11 | 0.76 | 10706465 |  |
|  | --- | -11 | 0.79 | 10727600 |  |
|  | --- | -10 | 0.82 | 10802574 |  |
|  | --- | -10 | 0.77 | 10927158 |  |
|  | --- | -9  | 0.75 | 10740841 |  |
|  | --- | -8  | 0.76 | 10706238 |  |
|  | --- | -6  | 0.82 | 10901139 |  |
|  | --- | 6   | 1.20 | 10856127 |  |
|  | --- | 6   | 1.20 | 10833090 |  |
|  | --- | 7   | 1.25 | 10856177 |  |
|  | --- | 8   | 1.24 | 10789696 |  |
|  | --- | 8   | 1.24 | 10719036 |  |
|  | --- | 9   | 1.33 | 10778804 |  |
|  | --- | 9   | 1.23 | 10862942 |  |
|  | --- | 9   | 1.26 | 10711995 |  |
|  | --- | 9   | 1.30 | 10899717 |  |
|  | --- | 9   | 1.22 | 10787805 |  |
|  | --- | 9   | 1.24 | 10882530 |  |
|  | --- | 9   | 1.26 | 10938066 |  |
|  | --- | 10  | 1.41 | 10798792 |  |
|  | --- | 10  | 1.26 | 10785598 |  |
|  | --- | 10  | 1.34 | 10702317 |  |
|  | --- | 10  | 1.44 | 10891491 |  |
|  | --- | 11  | 1.31 | 10781995 |  |
|  | --- | 11  | 1.27 | 10782889 |  |
|  | --- | 13  | 1.37 | 10759597 |  |
|  | --- | 14  | 1.29 | 10887052 |  |
|  | --- | 15  | 1.32 | 10852413 |  |
|  | --- | 16  | 1.38 | 10847172 |  |
|  | --- | 17  | 1.21 | 10704147 |  |
|  | --- | 19  | 1.25 | 10887066 |  |
|  | --- | 19  | 1.37 | 10814299 |  |
|  | --- | 19  | 1.26 | 10816483 |  |
|  | --- | 22  | 1.35 | 10755550 |  |
|  | --- | 24  | 1.38 | 10917344 |  |
|  | --- | 25  | 1.37 | 10809067 |  |
|  | --- | 26  | 1.33 | 10750898 |  |
|  | --- | 27  | 1.41 | 10903965 |  |
|  | --- | 27  | 1.78 | 10932699 |  |
|  | --- | 29  | 1.26 | 10878640 |  |
|  | --- | 29  | 1.27 | 10730659 |  |
|  | --- | 29  | 1.29 | 10751799 |  |
|  | --- | 31  | 1.31 | 10909137 |  |
|  | --- | 35  | 1.30 | 10888388 |  |
|  | --- | 44  | 1.43 | 10914898 |  |
|  | --- | 50  | 1.98 | 10767278 |  |
|  | --- | 57  | 1.57 | 10713873 |  |

|  |     |    |      |          |  |
|--|-----|----|------|----------|--|
|  | --- | 84 | 1.58 | 10934710 |  |
|  | --- | 84 | 1.78 | 10856228 |  |

**List 8. Genes Expressed Differentially in Stressed F3-Vinclozolin Rat Cortex Region as Compared to Non-Stressed F3-Vinclozolin ('Str-Vin vs Nst-Vin' contrast), 96 genes and EST's**

| <i>Gene Symbol</i>                      | <i>GenBank Reference Sequence</i> | <i>Mean_diff</i> | <i>Ratio</i> | <i>Affymetrix ID</i> | <i>Gene Title</i>                                                                |
|-----------------------------------------|-----------------------------------|------------------|--------------|----------------------|----------------------------------------------------------------------------------|
| <b>Development</b>                      |                                   |                  |              |                      |                                                                                  |
| Reln                                    | NM_080394                         | -67              | 0.81         | 10853020             | reelin                                                                           |
| RGD1563738                              | ENSRNOT00000052026                | 17               | 1.34         | 10916270             | similar to Discs, large homolog 5 (Placenta and prostate DLG)                    |
| <b>Epigenetics</b>                      |                                   |                  |              |                      |                                                                                  |
| LOC501799                               | ENSRNOT00000061397                | 107              | 1.75         | 10759485             | similar to chromobox homolog 3                                                   |
| <b>Growth Factors</b>                   |                                   |                  |              |                      |                                                                                  |
| Ctgf                                    | NM_022266                         | 43               | 1.28         | 10717233             | connective tissue growth factor                                                  |
| Fgf9                                    | NM_012952                         | -80              | 0.81         | 10780813             | fibroblast growth factor 9                                                       |
| <b>Immune Response</b>                  |                                   |                  |              |                      |                                                                                  |
| Btnl4                                   | NM_001166344                      | 7                | 1.27         | 10828340             | butyrophilin-like 4                                                              |
| <b>Metabolism &amp; Transport</b>       |                                   |                  |              |                      |                                                                                  |
| Acot1                                   | NM_031315                         | 5                | 1.20         | 10885857             | acyl-CoA thioesterase 1                                                          |
| Slc32a1                                 | NM_031782                         | -78              | 0.80         | 10841774             | solute carrier family 32 (GABA vesicular transporter), member 1                  |
| Lrp12                                   | NM_001134883                      | -81              | 0.82         | 10903503             | low density lipoprotein-related protein 12                                       |
| Pcbd1                                   | NM_001007601                      | -16              | 0.82         | 10830003             | pterin-4 alpha-carbinolamine dehydratase                                         |
| Piga                                    | NM_001108816                      | 45               | 1.20         | 10937719             | phosphatidylinositol glycan anchor biosynthesis, class A                         |
| Pla2g7                                  | NM_001009353                      | 56               | 1.21         | 10926683             | phospholipase A2, group VII (platelet-activating factor acetylhydrolase, plasma) |
| <b>Proteolysis</b>                      |                                   |                  |              |                      |                                                                                  |
| Ube2n                                   | BC090072                          | 33               | 1.58         | 10759435             | ubiquitin-conjugating enzyme E2N                                                 |
| <b>Receptors &amp; Binding Proteins</b> |                                   |                  |              |                      |                                                                                  |
| Ddr2                                    | NM_031764                         | -17              | 0.78         | 10769695             | discoidin domain receptor tyrosine kinase 2                                      |
| Igfbp6                                  | NM_013104                         | -78              | 0.68         | 10899465             | insulin-like growth factor binding protein 6                                     |
| Olr1559                                 | NM_001000049                      | -16              | 0.83         | 10750647             | olfactory receptor 1559                                                          |
| Olr213                                  | NM_001000735                      | 14               | 1.25         | 10724601             | olfactory receptor 213                                                           |
| Olr756                                  | NM_001000614                      | -9               | 0.79         | 10838414             | olfactory receptor 756                                                           |
| Olr862                                  | NM_001001071                      | -24              | 0.82         | 10879329             | olfactory receptor 862                                                           |
| LOC304239                               | ENSRNOT00000049215                | 26               | 1.40         | 10834046             | similar to RalA binding protein 1                                                |
| Vom2r1                                  | NM_001099460                      | 20               | 1.21         | 10701668             | vomer nasal 2 receptor, 3                                                        |
| Vom2r2                                  | ENSRNOT00000051591                | 9                | 1.25         | 10701636             | vomer nasal 2 receptor, 2                                                        |
| <b>Signaling</b>                        |                                   |                  |              |                      |                                                                                  |
| RGD1560808                              | ENSRNOT00000048991                | 29               | 1.35         | 10718191             | similar to putative protein kinase                                               |
| RGD1560825                              | ENSRNOT00000059958                | 22               | 1.25         | 10703256             | similar to putative protein kinase                                               |
| RGD1561667                              | ENSRNOT00000059957                | 17               | 1.25         | 10703287             | similar to putative protein kinase                                               |
| RGD1564858                              | ENSRNOT00000047604                | 15               | 1.23         | 10703274             | similar to putative protein kinase                                               |
| RGD1565231                              | ENSRNOT00000065348                | 25               | 1.24         | 10718188             | similar to putative protein kinase                                               |
| <b>Transcription</b>                    |                                   |                  |              |                      |                                                                                  |
| Chchd2                                  | NM_001015019                      | -99              | 0.79         | 10930091             | coiled-coil-helix-coiled-coil-helix domain containing 2                          |
| Klhl20                                  | NM_001107192                      | -46              | 0.80         | 10769204             | kelch-like 20 (Drosophila)                                                       |
| Med21                                   | NM_001107895                      | -46              | 0.83         | 10859655             | mediator complex subunit 21                                                      |

|                                               |                    |       |      |          |                                            |
|-----------------------------------------------|--------------------|-------|------|----------|--------------------------------------------|
| RGD1560135                                    | ENSRNOT00000040584 | 27    | 1.23 | 10830272 | similar to double homeobox, 4              |
| RGD1563747                                    | ENSRNOT00000040887 | 29    | 1.25 | 10833468 | similar to double homeobox, 4              |
| RGD1565550                                    | ENSRNOT00000040584 | 36    | 1.26 | 10830279 | similar to double homeobox, 4              |
| Txnip                                         | NM_001008767       | 142   | 1.37 | 10817552 | thioredoxin interacting protein            |
| Zcchc5                                        | ENSRNOT00000003296 | -14   | 0.83 | 10938988 | zinc finger, CCHC domain containing 5      |
| <b>Translation &amp; Protein Modification</b> |                    |       |      |          |                                            |
| Mrpl45                                        | NM_001105834       | -53   | 0.83 | 10737815 | mitochondrial ribosomal protein L45        |
| Rnaseh2b                                      | NM_001007007       | -34   | 0.80 | 10780937 | ribonuclease H2, subunit B                 |
| RGD1564095                                    | ENSRNOT00000061899 | 21    | 1.28 | 10867377 | similar to 60S acidic ribosomal protein P2 |
| RGD1565170                                    | ENSRNOT00000043836 | -16   | 0.73 | 10780763 | similar to 60S ribosomal protein L23a      |
| RGD1559877                                    | ENSRNOT00000049689 | 23    | 1.39 | 10800511 | similar to 60S ribosomal protein L29 (P23) |
| RGD1564552                                    | ENSRNOT00000050803 | -37   | 0.83 | 10799888 | similar to ribosomal protein L21           |
| <b>Miscellaneous &amp; Unknown</b>            |                    |       |      |          |                                            |
| LOC498544                                     | AY383688           | 9     | 1.20 | 10702078 | hypothetical protein LOC498544             |
| Spetex-2A                                     | ENSRNOT00000061476 | 14    | 1.29 | 10782777 | Spetex-2B protein                          |
| Mir196a                                       | NR_031913          | 8     | 1.24 | 10899597 | microRNA mir-196a                          |
| <b>EST's</b>                                  |                    |       |      |          |                                            |
| RGD1559459                                    | ENSRNOT00000065079 | -5    | 0.80 | 10771998 | similar to Expressed sequence AI788959     |
|                                               | XR_008286          | -23   | 0.75 | 10934032 |                                            |
|                                               | XR_008099          | -50   | 0.82 | 10798900 |                                            |
|                                               | XR_007963          | 16    | 1.25 | 10903522 |                                            |
|                                               | XR_007931          | -33   | 0.83 | 10836964 |                                            |
|                                               | NC_001665          | -282  | 0.62 | 10930569 |                                            |
|                                               | ENSRNOT00000054517 | -70   | 0.64 | 10797013 |                                            |
|                                               | ENSRNOT00000053929 | 113   | 1.35 | 10839872 |                                            |
|                                               | ENSRNOT00000053328 | -180  | 0.72 | 10855946 |                                            |
|                                               | ENSRNOT00000053279 | -241  | 0.80 | 10708691 |                                            |
|                                               | ENSRNOT00000053042 | 78    | 1.64 | 10937568 |                                            |
|                                               | ENSRNOT00000052710 | -107  | 0.64 | 10838282 |                                            |
|                                               | ENSRNOT00000052661 | -739  | 0.73 | 10722437 |                                            |
|                                               | ENSRNOT00000052661 | -739  | 0.73 | 10722441 |                                            |
|                                               | ENSRNOT00000052507 | -802  | 0.68 | 10722471 |                                            |
|                                               | ENSRNOT00000048364 | -12   | 0.77 | 10900112 |                                            |
|                                               | ENSRNOT0000006888  | 22    | 1.22 | 10892493 |                                            |
|                                               | AF188753           | -209  | 0.76 | 10855185 |                                            |
|                                               | ENSRNOT00000039948 | 32    | 1.28 | 10767044 |                                            |
|                                               | ---                | 55    | 1.23 | 10748601 |                                            |
|                                               | ---                | -1073 | 0.46 | 10722449 |                                            |
|                                               | ---                | -829  | 0.76 | 10761253 |                                            |
|                                               | ---                | -620  | 0.61 | 10722481 |                                            |
|                                               | ---                | -596  | 0.76 | 10722461 |                                            |
|                                               | ---                | -545  | 0.70 | 10722433 |                                            |
|                                               | ---                | -381  | 0.76 | 10758031 |                                            |
|                                               | ---                | -236  | 0.56 | 10722451 |                                            |
|                                               | ---                | -190  | 0.59 | 10722427 |                                            |
|                                               | ---                | -165  | 0.78 | 10848027 |                                            |
|                                               | ---                | -103  | 0.82 | 10846928 |                                            |
|                                               | ---                | -98   | 0.73 | 10722459 |                                            |
|                                               | ---                | -48   | 0.82 | 10787706 |                                            |
|                                               | ---                | -32   | 0.81 | 10884738 |                                            |
|                                               | ---                | -21   | 0.77 | 10831804 |                                            |
|                                               | ---                | -11   | 0.81 | 10894798 |                                            |
|                                               | ---                | 8     | 1.22 | 10850313 |                                            |

|  |     |    |      |          |  |
|--|-----|----|------|----------|--|
|  | --- | 9  | 1.23 | 10860595 |  |
|  | --- | 12 | 1.21 | 10714183 |  |
|  | --- | 12 | 1.34 | 10769229 |  |
|  | --- | 14 | 1.32 | 10785598 |  |
|  | --- | 14 | 1.32 | 10774339 |  |
|  | --- | 25 | 1.20 | 10771525 |  |
|  | --- | 26 | 1.20 | 10888388 |  |
|  | --- | 29 | 1.31 | 10734368 |  |
|  | --- | 33 | 1.58 | 10756268 |  |
|  | --- | 33 | 1.58 | 10756270 |  |
|  | --- | 33 | 1.58 | 10756272 |  |
|  | --- | 33 | 1.58 | 10759445 |  |
|  | --- | 56 | 1.31 | 10934710 |  |
|  | --- | 72 | 1.51 | 10933038 |  |

**List 9. Genes Expressed Differentially in Non-Stressed F3-Vinclozolin Rat CA1 of the Hippocampus as Compared to Non-Stressed F3-Control ('Nst-Vin vs Nst-Con' contrast), 68 genes and EST's**

| <i>Gene Symbol</i>                      | <i>GenBank_Reference Sequence</i> | <i>Mean_diff</i> | <i>Ratio</i> | <i>Affymetrix ID</i> | <i>Gene Title</i>                                              |
|-----------------------------------------|-----------------------------------|------------------|--------------|----------------------|----------------------------------------------------------------|
| <b>Apoptosis</b>                        |                                   |                  |              |                      |                                                                |
| Ankdd1a                                 | ENSRNOT00000033512                | 16               | 1.29         | 10918281             | ankyrin repeat and death domain containing 1A                  |
| RGD1563348                              | NM_001114939                      | 13               | 1.30         | 10912076             | similar to Selenoprotein H                                     |
| RGD1559610                              | BC168964                          | 73               | 1.21         | 10879679             | similar to CGI-94 protein                                      |
| <b>Cytoskeleton-ECM</b>                 |                                   |                  |              |                      |                                                                |
| Gpc4                                    | NM_001014108                      | 65               | 1.32         | 10939744             | glypican 4                                                     |
| Kb23                                    | NM_001008813                      | 33               | 1.21         | 10907369             | type II keratin Kb23                                           |
| Pcdh8                                   | NM_022868                         | 49               | 1.24         | 10785461             | protocadherin 8                                                |
| Pcdhb19                                 | ENSRNOT00000060484                | 40               | 1.27         | 10801204             | protocadherin beta 19                                          |
| Rimbp2                                  | NM_001100488                      | 82               | 1.25         | 10758064             | RIMS binding protein 2                                         |
| Scg3                                    | NM_053856                         | 196              | 1.20         | 10918738             | secretogranin III                                              |
| <b>Epigenetics</b>                      |                                   |                  |              |                      |                                                                |
| Dact3                                   | ENSRNOT00000043203                | 69               | 1.20         | 10704555             | dapper, antagonist of beta-catenin, homolog 3 (Xenopus laevis) |
| <b>Immune Response</b>                  |                                   |                  |              |                      |                                                                |
| C1qbp                                   | NM_019259                         | 84               | 1.20         | 10744568             | complement component 1, q subcomponent binding protein         |
| C1ql3                                   | NM_001109403                      | 235              | 1.42         | 10799733             | complement component 1, q subcomponent-like 3                  |
| <b>Metabolism &amp; Transport</b>       |                                   |                  |              |                      |                                                                |
| Atp11a                                  | NM_001107324                      | -213             | 0.72         | 10792859             | ATPase, class VI, type 11A                                     |
| Car14                                   | NM_001109655                      | -118             | 0.62         | 10825100             | carbonic anhydrase 14                                          |
| Chi3l4                                  | ENSRNOT00000055968                | 7                | 1.20         | 10825770             | chitinase 3-like 4                                             |
| Lrp12                                   | NM_001134883                      | 114              | 1.24         | 10903501             | low density lipoprotein-related protein 12                     |
| Slc8a2                                  | NM_078619                         | 163              | 1.24         | 10704437             | solute carrier family 8 (sodium                                |
| Retsat                                  | NM_145084                         | 166              | 1.36         | 10856424             | retinol saturase (all trans retinol 13,14 reductase)           |
| Sulf1                                   | NM_134378                         | -67              | 0.71         | 10874981             | sulfatase 1                                                    |
| <b>Proteolysis</b>                      |                                   |                  |              |                      |                                                                |
| Rnf213                                  | ENSRNOT00000004904                | -16              | 0.82         | 10740016             | ring finger protein 213                                        |
| <b>Receptors &amp; Binding Proteins</b> |                                   |                  |              |                      |                                                                |
| Olr1320                                 | NM_001000471                      | 19               | 1.28         | 10909285             | olfactory receptor 1320                                        |
| Olr1424                                 | NM_001000779                      | 10               | 1.24         | 10742937             | olfactory receptor 1424                                        |
| Olr221                                  | NM_001000200                      | -13              | 0.82         | 10724609             | olfactory receptor 221                                         |
| Olr711                                  | NM_001000625                      | -6               | 0.83         | 10847213             | olfactory receptor 711                                         |



|                                               |                    |       |      |          |                                                                    |
|-----------------------------------------------|--------------------|-------|------|----------|--------------------------------------------------------------------|
| <b>Signaling</b>                              |                    |       |      |          |                                                                    |
| Calcoco2                                      | XM_220903          | 6     | 1.24 | 10746588 | calcium binding and coiled-coil domain 2                           |
| Akap5                                         | NM_133515          | 71    | 1.20 | 10885393 | A kinase (PRKA) anchor protein 5                                   |
| Defb42                                        | NM_001037532       | -151  | 0.83 | 10784446 | defensin beta 42                                                   |
| Enpp2                                         | NM_057104          | -2109 | 0.42 | 10903736 | ectonucleotide pyrophosphatase                                     |
| Plekho2                                       | ENSRNOT00000042633 | 27    | 1.22 | 10918288 | pleckstrin homology domain containing, family O member 2           |
| Prosapip1                                     | NM_172022          | 130   | 1.23 | 10849927 | ProSAPiP1 protein                                                  |
| Rab40b                                        | NM_001107076       | 63    | 1.20 | 10749809 | Rab40b, member RAS oncogene family                                 |
| RGD1561955                                    | ENSRNOT00000058079 | 93    | 1.35 | 10785405 | similar to diacylglycerol kinase eta                               |
| Smad1                                         | NM_013130          | 38    | 1.24 | 10806981 | SMAD family member 1                                               |
| Smpdl3b                                       | NM_001025737       | 55    | 1.28 | 10880339 | sphingomyelin phosphodiesterase, acid-like 3B                      |
| <b>Transcription</b>                          |                    |       |      |          |                                                                    |
| Bhlhe41                                       | AF009329           | 102   | 1.29 | 10867026 | basic helix-loop-helix family, member e41                          |
| Baz1b                                         | ENSRNOT00000001975 | 77    | 1.20 | 10761209 | bromodomain adjacent to zinc finger domain, 1B                     |
| Case5                                         | ENSRNOT00000067081 | 51    | 1.40 | 10838741 | cancer susceptibility candidate 5                                  |
| Ccdc34                                        | NM_001108587       | 29    | 1.21 | 10838373 | coiled-coil domain containing 34                                   |
| Dnajc8                                        | NM_001013168       | 148   | 1.21 | 10880372 | DnaJ (Hsp40) homolog, subfamily C, member 8                        |
| Kbtbd11                                       | NM_001107326       | 42    | 1.33 | 10792660 | kelch repeat and BTB (POZ) domain containing 11                    |
| Klhl12                                        | NM_153730          | 44    | 1.22 | 10764126 | kelch-like 12 (Drosophila)                                         |
| Mitf                                          | ENSRNOT00000051121 | -22   | 0.81 | 10857435 | microphthalmia-associated transcription factor                     |
| LOC691642                                     | XM_002726878       | 19    | 1.27 | 10894417 | similar to high mobility group nucleosomal binding domain 1        |
| LOC680767                                     | ENSRNOT00000060096 | 133   | 1.22 | 10760816 | similar to transcription elongation factor B (SIII), polypeptide 1 |
| <b>Translation &amp; Protein Modification</b> |                    |       |      |          |                                                                    |
| RGD1559743                                    | XM_001077121       | -21   | 0.82 | 10920785 | similar to 40S ribosomal protein S16                               |
| <b>Miscellaneous &amp; Unknown</b>            |                    |       |      |          |                                                                    |
| Utp18                                         | NM_001135039       | 58    | 1.22 | 10746256 | UTP18, small subunit (SSU) processome component, homolog (yeast)   |
| RGD1308601                                    | NM_001107374       | 63    | 1.24 | 10805304 | similar to hypothetical protein                                    |
| <b>EST's</b>                                  |                    |       |      |          |                                                                    |
|                                               | ---                | -164  | 0.82 | 10750114 |                                                                    |
|                                               | ---                | -108  | 0.71 | 10716702 |                                                                    |
|                                               | ---                | -58   | 0.83 | 10740505 |                                                                    |
|                                               | ---                | -48   | 0.81 | 10923727 |                                                                    |
|                                               | ---                | -46   | 0.78 | 10830161 |                                                                    |
|                                               | ---                | -45   | 0.82 | 10820145 |                                                                    |
|                                               | ---                | -41   | 0.76 | 10892648 |                                                                    |
|                                               | ---                | -40   | 0.75 | 10788099 |                                                                    |
|                                               | ---                | -27   | 0.82 | 10932580 |                                                                    |
|                                               | ---                | -15   | 0.82 | 10887022 |                                                                    |
|                                               | ---                | -15   | 0.82 | 10887038 |                                                                    |
|                                               | ---                | -12   | 0.83 | 10787822 |                                                                    |
|                                               | ---                | 7     | 1.23 | 10823674 |                                                                    |
|                                               | ---                | 10    | 1.25 | 10722713 |                                                                    |
|                                               | ---                | 11    | 1.36 | 10850319 |                                                                    |
|                                               | ---                | 14    | 1.22 | 10707254 |                                                                    |
|                                               | ---                | 14    | 1.25 | 10749852 |                                                                    |
|                                               | ---                | 17    | 1.23 | 10827347 |                                                                    |
|                                               | ---                | 18    | 1.21 | 10804461 |                                                                    |
|                                               | ---                | 23    | 1.23 | 10887336 |                                                                    |
|                                               | ---                | 74    | 1.26 | 10809882 |                                                                    |

**List 10. Genes Expressed Differentially in Stressed F3-Vinclozolin Rat CA1 of the Hippocampus as Compared to Stressed F3-Control ('St-Vin vs St-Con' contrast), 155 genes and EST's**

| <i>Gene Symbol</i>                | <i>GenBank_Reference Sequence</i> | <i>Mean_diff</i> | <i>Ratio</i> | <i>Affymetrix ID</i> | <i>Gene Title</i>                                             |
|-----------------------------------|-----------------------------------|------------------|--------------|----------------------|---------------------------------------------------------------|
| <b>Apoptosis</b>                  |                                   |                  |              |                      |                                                               |
| Tnfsf4                            | NM_053552                         | -24              | 0.79         | 10765092             | tumor necrosis factor (ligand) superfamily, member 4          |
| Tnfaip8l3                         | ENSRNOT00000038830                | -10              | 0.80         | 10917501             | tumor necrosis factor, alpha-induced protein 8-like 3         |
| <b>Cell Cycle</b>                 |                                   |                  |              |                      |                                                               |
| Cspp1                             | ENSRNOT00000030345                | -84              | 0.79         | 10875091             | centrosome and spindle pole associated protein 1              |
| <b>Cytoskeleton-ECM</b>           |                                   |                  |              |                      |                                                               |
| Bgn                               | NM_017087                         | 48               | 1.38         | 10935890             | biglycan                                                      |
| Ceacam10                          | NM_173339                         | 9                | 1.28         | 10705034             | carcinoembryonic antigen-related cell adhesion molecule 10    |
| Myom2                             | NM_001169141                      | -9               | 0.83         | 10792621             | myomesin 2                                                    |
| LOC680489                         | NM_001109415                      | -19              | 0.81         | 10938099             | similar to claudin 1                                          |
| Twf1                              | NM_001008521                      | 9                | 1.22         | 10871693             | twinfilin, actin-binding protein, homolog 1 (Drosophila)      |
| <b>Development</b>                |                                   |                  |              |                      |                                                               |
| Auts2                             | ENSRNOT00000044800                | -42              | 0.81         | 10761299             | autism susceptibility candidate 2                             |
| Nlgn1                             | NM_053868                         | -86              | 0.83         | 10822545             | neuroligin 1                                                  |
| Syt17                             | NM_138849                         | 203              | 1.26         | 10725235             | synaptotagmin XVII                                            |
| Sntg1                             | ENSRNOT00000009679                | -71              | 0.83         | 10867345             | syntrophin, gamma 1                                           |
| Tert                              | NM_053423                         | -18              | 0.83         | 10717517             | telomerase reverse transcriptase                              |
| Tor1b                             | NM_001039197                      | 39               | 1.25         | 10835261             | torsin family 1, member B                                     |
| Vgll3                             | ENSRNOT00000042316                | -37              | 0.74         | 10749839             | vestigial like 3 (Drosophila)                                 |
| <b>Electron Transport</b>         |                                   |                  |              |                      |                                                               |
| Cyp2c13                           | NM_138514                         | -32              | 0.82         | 10930762             | cytochrome P450, family 2, subfamily c, polypeptide 13        |
| LOC100174910                      | NM_001131003                      | -90              | 0.78         | 10804552             | glutaredoxin-like protein                                     |
| <b>Epigenetics</b>                |                                   |                  |              |                      |                                                               |
| Brd8                              | NM_001008509                      | 57               | 1.22         | 10803774             | bromodomain containing 8                                      |
| <b>Growth Factors</b>             |                                   |                  |              |                      |                                                               |
| Gdf10                             | NM_024375                         | -25              | 0.76         | 10786905             | growth differentiation factor 10                              |
| Gdf9                              | NM_021672                         | 41               | 1.23         | 10733506             | growth differentiation factor 9                               |
| Il15                              | NM_013129                         | -15              | 0.82         | 10806899             | interleukin 15                                                |
| Kng1l1                            | NM_001009628                      | -49              | 0.72         | 10755135             | kininogen 1-like 1                                            |
| LOC360228                         | NM_001003706                      | -25              | 0.80         | 10736875             | WDNM1 homolog                                                 |
| Sept12                            | NM_001100865                      | -11              | 0.81         | 10731699             | septin 12                                                     |
| Tgfb2                             | NM_031131                         | 150              | 1.37         | 10770577             | transforming growth factor, beta 2                            |
| <b>Immune Response</b>            |                                   |                  |              |                      |                                                               |
| Il22                              | ENSRNOT00000009776                | -15              | 0.82         | 10895618             | interleukin 22                                                |
| LOC688858                         | XM_001068599                      | -181             | 0.82         | 10759581             | similar to CD209a antigen                                     |
| RT1-DMb                           | NM_198740                         | 37               | 1.26         | 10831620             | RT1 class II, locus DMb                                       |
| RT1-M6-1                          | NM_001008852                      | -45              | 0.74         | 10827686             | RT1 class I, locus M6, gene 1                                 |
| <b>Metabolism &amp; Transport</b> |                                   |                  |              |                      |                                                               |
| Dio2                              | NM_031720                         | 24               | 1.22         | 10891402             | deiodinase, iodothyronine, type II                            |
| Ddost                             | NM_001012104                      | 234              | 1.22         | 10873303             | dolichyl-diphosphooligosaccharide-protein glycosyltransferase |
| Mocos                             | NM_001108425                      | -12              | 0.82         | 10800546             | molybdenum cofactor sulfurase                                 |

|                                         |                    |      |      |          |                                                              |
|-----------------------------------------|--------------------|------|------|----------|--------------------------------------------------------------|
| Por                                     | NM_031576          | 73   | 1.21 | 10761162 | P450 (cytochrome) oxidoreductase                             |
| Ppid                                    | NM_001004279       | -243 | 0.83 | 10816008 | peptidylprolyl isomerase D (cyclophilin D)                   |
| RGD1565145                              | ENSRNOT00000017696 | -12  | 0.80 | 10914045 | similar to cysteine sulfinic acid decarboxylase              |
| Ttpal                                   | NM_001106537       | 61   | 1.22 | 10842032 | tocopherol (alpha) transfer protein-like                     |
| <b>Proteolysis</b>                      |                    |      |      |          |                                                              |
| Klk15                                   | ENSRNOT00000038353 | -16  | 0.83 | 10706498 | kallikrein-related peptidase 15                              |
| LOC688812                               | XR_085983          | -31  | 0.79 | 10756117 | similar to ubiquitin-activating enzyme E1C                   |
| Pm20d2                                  | NM_001107922       | 16   | 1.23 | 10875853 | peptidase M20 domain containing 2                            |
| Prep                                    | NM_001106281       | 91   | 1.32 | 10708672 | prolylcarboxypeptidase (angiotensinase C)                    |
| Ubc                                     | NM_017314          | 284  | 1.26 | 10758134 | ubiquitin C                                                  |
| Ubd                                     | NM_053299          | -31  | 0.83 | 10830854 | ubiquitin D                                                  |
| <b>Receptors &amp; Binding Proteins</b> |                    |      |      |          |                                                              |
| Gfra1                                   | NM_012959          | 92   | 1.30 | 10731075 | GDNF family receptor alpha 1                                 |
| Ifngr1                                  | NM_053783          | 96   | 1.22 | 10701924 | interferon gamma receptor 1                                  |
| LOC304239                               | ENSRNOT00000049215 | -45  | 0.72 | 10756334 | similar to RalA binding protein 1                            |
| Olr1057                                 | NM_001000072       | -14  | 0.83 | 10900081 | olfactory receptor 1057                                      |
| Olr1405                                 | NM_001001012       | -31  | 0.82 | 10733296 | olfactory receptor 1405                                      |
| Olr160                                  | NM_001000738       | -23  | 0.81 | 10709507 | olfactory receptor 160                                       |
| Olr1734                                 | NM_001001119       | -8   | 0.76 | 10827639 | olfactory receptor 1734                                      |
| Olr542                                  | NM_001000566       | -30  | 0.70 | 10847042 | olfactory receptor 542                                       |
| Olr582                                  | NM_001000662       | -35  | 0.67 | 10837545 | olfactory receptor 582                                       |
| Olr584                                  | NM_001000661       | -13  | 0.83 | 10847074 | olfactory receptor 584                                       |
| Olr629                                  | NM_001001058       | -24  | 0.76 | 10847109 | olfactory receptor 629                                       |
| Olr720                                  | NM_001001067       | -26  | 0.82 | 10847229 | olfactory receptor 720                                       |
| Olr734                                  | NM_001000617       | -22  | 0.81 | 10847242 | olfactory receptor 734                                       |
| Olr996                                  | NM_001000700       | 30   | 1.37 | 10893375 | olfactory receptor 996                                       |
| Paqr5                                   | NM_001014092       | 21   | 1.21 | 10918055 | progesterone and adipoQ receptor family member V             |
| Robo3                                   | NM_001108135       | -15  | 0.81 | 10916201 | roundabout homolog 3 (Drosophila)                            |
| Tlr2                                    | NM_198769          | 10   | 1.26 | 10823970 | toll-like receptor 2                                         |
| Vom2r66                                 | ENSRNOT00000051621 | 66   | 1.32 | 10774903 | vomeroneural 2 receptor, 66                                  |
| Vom2r-ps27                              | ENSRNOT00000051051 | -17  | 0.83 | 10718403 | vomeroneural 2 receptor, pseudogene 27                       |
| <b>Signaling</b>                        |                    |      |      |          |                                                              |
| Ebag9                                   | NM_001009665       | 77   | 1.20 | 10896486 | estrogen receptor binding site associated, antigen, 9        |
| Gbp4                                    | ENSRNOT00000022648 | -12  | 0.83 | 10819512 | guanylate binding protein 4                                  |
| Smek1                                   | NM_001108050       | 94   | 1.21 | 10891719 | SMEK homolog 1, suppressor of mek1 (Dictyostelium)           |
| Sh3bp4                                  | NM_022693          | 105  | 1.38 | 10925264 | SH3-domain binding protein 4                                 |
| <b>Transcription</b>                    |                    |      |      |          |                                                              |
| Ccdc37                                  | ENSRNOT00000024222 | -15  | 0.76 | 10864025 | coiled-coil domain containing 37                             |
| Dnajc11                                 | NM_001108694       | 83   | 1.21 | 10874223 | DnaJ (Hsp40) homolog, subfamily C, member 11                 |
| Dnajc30                                 | NM_001109024       | 21   | 1.30 | 10761225 | DnaJ (Hsp40) homolog, subfamily C, member 30                 |
| Elk1                                    | NM_001108059       | 72   | 1.22 | 10936520 | ELK1, member of ETS oncogene family                          |
| Gtf2ird1                                | NM_001001504       | -16  | 0.82 | 10757829 | GTF2I repeat domain containing 1                             |
| Hint1                                   | ENSRNOT00000006471 | -13  | 0.78 | 10862836 | histidine triad nucleotide binding protein 1                 |
| Luzp1                                   | AF181259           | -16  | 0.83 | 10873012 | leucine zipper protein 1                                     |
| Ldoc11                                  | ENSRNOT00000039588 | 83   | 1.29 | 10905915 | leucine zipper, down-regulated in cancer 1-like              |
| LOC691468                               | XM_002724499       | 42   | 1.22 | 10733914 | similar to Zinc finger protein 84 (Zinc finger protein HPF2) |
| Tdpz1                                   | XM_345239          | 40   | 1.20 | 10824790 | TD and POZ domain containing 1                               |
| Tada2b                                  | NM_001170455       | -44  | 0.81 | 10773358 | transcriptional adaptor 2 (ADA2 homolog, yeast)-beta         |
| Zfp212                                  | ENSRNOT00000009054 | -64  | 0.83 | 10855203 | Zinc finger protein 212                                      |
| Znf307                                  | ENSRNOT00000024797 | -31  | 0.81 | 10795315 | zinc finger protein 307                                      |
| Znf488                                  | ENSRNOT00000031496 | 13   | 1.24 | 10790433 | zinc finger protein 488                                      |

|                                               |                    |     |      |          |                                                            |
|-----------------------------------------------|--------------------|-----|------|----------|------------------------------------------------------------|
| <b>Translation &amp; Protein Modification</b> |                    |     |      |          |                                                            |
| LOC362863                                     | NM_001170605       | -13 | 0.83 | 10894643 | first gene upstream of Nt5dc3                              |
| Pth1                                          | NM_001108580       | -23 | 0.82 | 10835624 | peptidyl-tRNA hydrolase 1 homolog ( <i>S. cerevisiae</i> ) |
| Polr1b                                        | NM_031773          | 37  | 1.22 | 10839751 | polymerase (RNA) I polypeptide B                           |
| Rplp2                                         | NM_001030021       | 367 | 1.24 | 10776809 | ribosomal protein, large P2                                |
| RGD1563551                                    | ENSRNOT00000047507 | -7  | 0.79 | 10865372 | similar to ribosomal protein L31                           |
| <b>Miscellaneous &amp; Unknown</b>            |                    |     |      |          |                                                            |
| LOC100192313                                  | NM_001136261       | 250 | 1.20 | 10902333 | hypothetical protein LOC100192313                          |
| LOC502684                                     | NM_001025060       | -12 | 0.76 | 10840826 | hypothetical protein LOC502684                             |
| LOC691649                                     | ENSRNOT00000005237 | 110 | 1.23 | 10734061 | hypothetical protein LOC691649                             |
| Rcan3                                         | NM_001012746       | 33  | 1.32 | 10880610 | RCAN family member 3                                       |
| RGD1564171                                    | NM_001109186       | -35 | 0.72 | 10816879 | RGD1564171                                                 |
| RGD1311188                                    | BC162017           | 44  | 1.21 | 10897118 | similar to 1500031N24Rik protein                           |
| MGC94282                                      | NR_027366          | 20  | 1.28 | 10865838 | similar to 5930416I19Rik protein                           |
| RGD1564129                                    | ENSRNOT00000038189 | -7  | 0.83 | 10795611 | similar to hypothetical protein 4930474N05                 |
| RGD1563072                                    | NM_001107981       | 58  | 1.23 | 10872059 | similar to hypothetical protein FLJ38984                   |
| Ttc21a                                        | ENSRNOT00000043831 | -13 | 0.79 | 10914271 | tetratricopeptide repeat domain 21A                        |
| Tsku                                          | NM_001009965       | -33 | 0.81 | 10723822 | tsukushin                                                  |
| <b>EST's</b>                                  |                    |     |      |          |                                                            |
| RGD1311575                                    | ENSRNOT0000002908  | -32 | 0.81 | 10776361 | hypothetical LOC289568                                     |
| RGD1306462                                    | BC097453           | -13 | 0.83 | 10906065 | similar to RIKEN cDNA 1700019P01                           |
| RGD1306446                                    | NM_001008554       | -9  | 0.82 | 10772030 | similar to RIKEN cDNA 9930032O22 gene                      |
|                                               |                    | --- | 0.79 | 10855185 |                                                            |
|                                               |                    | --- | 0.80 | 10932269 |                                                            |
|                                               |                    | --- | 0.82 | 10890648 |                                                            |
|                                               |                    | --- | 0.74 | 10831148 |                                                            |
|                                               |                    | --- | 0.80 | 10894227 |                                                            |
|                                               |                    | --- | 0.78 | 10872129 |                                                            |
|                                               |                    | --- | 0.79 | 10788314 |                                                            |
|                                               |                    | --- | 0.81 | 10914901 |                                                            |
|                                               |                    | --- | 0.70 | 10807957 |                                                            |
|                                               |                    | --- | 0.68 | 10818911 |                                                            |
|                                               |                    | --- | 0.82 | 10820213 |                                                            |
|                                               |                    | --- | 0.78 | 10804712 |                                                            |
|                                               |                    | --- | 0.77 | 10796438 |                                                            |
|                                               |                    | --- | 0.81 | 10746789 |                                                            |
|                                               |                    | --- | 0.76 | 10883023 |                                                            |
|                                               |                    | --- | 0.77 | 10914877 |                                                            |
|                                               |                    | --- | 0.70 | 10840477 |                                                            |
|                                               |                    | --- | 0.81 | 10717953 |                                                            |
|                                               |                    | --- | 0.54 | 10736193 |                                                            |
|                                               |                    | --- | 0.76 | 10790465 |                                                            |
|                                               |                    | --- | 0.77 | 10726483 |                                                            |
|                                               |                    | --- | 0.66 | 10723687 |                                                            |
|                                               |                    | --- | 0.61 | 10776289 |                                                            |
|                                               |                    | --- | 0.79 | 10893305 |                                                            |
|                                               |                    | --- | 0.77 | 10802574 |                                                            |
|                                               |                    | --- | 0.78 | 10755550 |                                                            |
|                                               |                    | --- | 0.78 | 10771204 |                                                            |
|                                               |                    | --- | 0.65 | 10807883 |                                                            |
|                                               |                    | --- | 0.82 | 10850090 |                                                            |
|                                               |                    | --- | 0.75 | 10877567 |                                                            |

|  |     |     |      |          |  |
|--|-----|-----|------|----------|--|
|  | --- | -13 | 0.75 | 10701666 |  |
|  | --- | -12 | 0.82 | 10725517 |  |
|  | --- | -12 | 0.78 | 10830185 |  |
|  | --- | -11 | 0.81 | 10894874 |  |
|  | --- | -11 | 0.83 | 10764047 |  |
|  | --- | -10 | 0.80 | 10763316 |  |
|  | --- | -10 | 0.79 | 10890166 |  |
|  | --- | -10 | 0.82 | 10754929 |  |
|  | --- | -9  | 0.80 | 10803721 |  |
|  | --- | -8  | 0.76 | 10933227 |  |
|  | --- | -8  | 0.79 | 10729120 |  |
|  | --- | -8  | 0.83 | 10839972 |  |
|  | --- | -8  | 0.81 | 10776737 |  |
|  | --- | -7  | 0.82 | 10863051 |  |
|  | --- | 5   | 1.21 | 10814661 |  |
|  | --- | 8   | 1.20 | 10877368 |  |
|  | --- | 9   | 1.22 | 10894850 |  |
|  | --- | 12  | 1.32 | 10886244 |  |
|  | --- | 13  | 1.24 | 10823498 |  |
|  | --- | 22  | 1.59 | 10850319 |  |
|  | --- | 27  | 1.21 | 10764400 |  |
|  | --- | 31  | 1.35 | 10934042 |  |
|  | --- | 32  | 1.22 | 10896201 |  |
|  | --- | 42  | 1.21 | 10880526 |  |
|  | --- | 46  | 1.24 | 10797939 |  |
|  | --- | 68  | 1.60 | 10722816 |  |
|  | --- | 111 | 1.22 | 10708560 |  |

**List 11. Genes Expressed Differentially in Stressed F3-Control Rat CA1 of the Hippocampus as Compared to Non-Stressed F3-Control ('Str-Con vs Nst-Con' contrast), 118 genes and EST's**

| <i>Gene Symbol</i>        | <i>GenBank_Reference Sequence</i> | <i>Mean_diff</i> | <i>Ratio</i> | <i>Affymetrix ID</i> | <i>Gene Title</i>                                                     |
|---------------------------|-----------------------------------|------------------|--------------|----------------------|-----------------------------------------------------------------------|
| <b>Cytoskeleton-ECM</b>   |                                   |                  |              |                      |                                                                       |
| Glycam1                   | NM_012794                         | -65              | 0.79         | 10907749             | glycosylation dependent cell adhesion molecule 1                      |
| Kb23                      | NM_001008813                      | 32               | 1.20         | 10907369             | type II keratin Kb23                                                  |
| Kif27                     | NM_198050                         | -20              | 0.78         | 10793846             | kinesin family member 27                                              |
| Lamb2                     | NM_012974                         | -44              | 0.78         | 10793140             | laminin, beta 2                                                       |
| Lpp                       | NM_001013864                      | -34              | 0.78         | 10755069             | LIM domain containing preferred translocation partner in lipoma       |
| <b>Development</b>        |                                   |                  |              |                      |                                                                       |
| Atn1                      | NM_017228                         | 57               | 1.22         | 10865487             | atrophin 1                                                            |
| Pbxip1                    | NM_001100976                      | -51              | 0.79         | 10816807             | pre-B-cell leukemia homeobox interacting protein 1                    |
| Pinx1                     | NM_001083337                      | -24              | 0.80         | 10781014             | PIN2-interacting protein 1                                            |
| Rex2                      | ENSRNOT00000040918                | 52               | 1.28         | 10873880             | reduced expression 2                                                  |
| Rhox11                    | NM_001024873                      | 13               | 1.25         | 10936270             | reproductive homeobox 11                                              |
| <b>Electron Transport</b> |                                   |                  |              |                      |                                                                       |
| Cox8b                     | NM_012786                         | -10              | 0.81         | 10726669             | cytochrome c oxidase, subunit VIIIb                                   |
| Etfb                      | NM_001004220                      | -65              | 0.81         | 10706339             | electron-transfer-flavoprotein, beta polypeptide                      |
| Prdx4                     | NM_053512                         | -40              | 0.82         | 10933699             | peroxiredoxin 4                                                       |
| Pet112l                   | ENSRNOT00000057128                | -64              | 0.82         | 10816176             | PET112-like (yeast)                                                   |
| Tmem126a                  | NM_001011557                      | -30              | 0.81         | 10723639             | transmembrane protein 126A                                            |
| <b>Epigenetics</b>        |                                   |                  |              |                      |                                                                       |
| Cbfa2t3                   | NM_001108453                      | 12               | 1.21         | 10811688             | core-binding factor, runt domain, alpha subunit 2; translocated to, 3 |

|                                         |                    |       |      |          |                                                                                               |
|-----------------------------------------|--------------------|-------|------|----------|-----------------------------------------------------------------------------------------------|
| <b>Growth Factors</b>                   |                    |       |      |          |                                                                                               |
| Igf2r                                   | NM_012756          | -91   | 0.80 | 10702996 | insulin-like growth factor 2 receptor                                                         |
| Mif                                     | NM_031051          | -270  | 0.83 | 10829649 | macrophage migration inhibitory factor                                                        |
| <b>Immune Response</b>                  |                    |       |      |          |                                                                                               |
| Mr1                                     | NM_001100635       | -23   | 0.82 | 10768819 | major histocompatibility complex, class I-related                                             |
| LOC287167                               | NM_001013853       | -93   | 0.78 | 10741765 | globin, alpha                                                                                 |
| <b>Metabolism &amp; Transport</b>       |                    |       |      |          |                                                                                               |
| Acaa2                                   | NM_130433          | -46   | 0.80 | 10802691 | acetyl-Coenzyme A acyltransferase 2                                                           |
| Aldh2                                   | NM_032416          | -87   | 0.76 | 10758663 | aldehyde dehydrogenase 2 family (mitochondrial)                                               |
| Apoc1                                   | NM_012824          | -26   | 0.74 | 10719524 | apolipoprotein C-I                                                                            |
| Atp5g1                                  | NM_017311          | -134  | 0.83 | 10746583 | ATP synthase, H+ transporting, mitochondrial F0 complex, subunit C1 (subunit 9)               |
| Atp5g2                                  | NM_133556          | -180  | 0.82 | 10907634 | ATP synthase, H+ transporting, mitochondrial F0 complex, subunit C2 (subunit 9)               |
| Decr1                                   | NM_057197          | -53   | 0.83 | 10875631 | 2,4-dienoyl CoA reductase 1, mitochondrial                                                    |
| Grhpr                                   | NM_001113754       | -50   | 0.83 | 10868673 | glyoxylate reductase                                                                          |
| Gsta3                                   | NM_031509          | -304  | 0.81 | 10926958 | glutathione S-transferase A3                                                                  |
| Gsta4                                   | NM_001106840       | -29   | 0.69 | 10911797 | glutathione S-transferase alpha 4                                                             |
| Hba-a2                                  | NM_013096          | -1385 | 0.63 | 10741756 | hemoglobin alpha, adult chain 2                                                               |
| Hbb                                     | NM_033234          | -300  | 0.64 | 10724311 | hemoglobin, beta                                                                              |
| Idh2                                    | NM_001014161       | -129  | 0.74 | 10723020 | isocitrate dehydrogenase 2 (NADP+), mitochondrial                                             |
| LOC682386                               | ENSRNOT00000027244 | -37   | 0.80 | 10803759 | similar to Nucleoside diphosphate kinase homolog 5 (NDK-H 5) (NDP kinase homolog 5) (nm23-M5) |
| Ndufab1                                 | NM_001106294       | -209  | 0.77 | 10725474 | NADH dehydrogenase (ubiquinone) 1, alpha                                                      |
| Odc1                                    | NM_012615          | -137  | 0.82 | 10883785 | ornithine decarboxylase 1                                                                     |
| Pex14                                   | NM_172063          | 50    | 1.27 | 10881648 | peroxisomal biogenesis factor 14                                                              |
| Prodh                                   | NM_001135778       | -122  | 0.75 | 10752352 | proline dehydrogenase                                                                         |
| Sult1a1                                 | NM_031834          | -60   | 0.78 | 10725782 | sulfotransferase family, cytosolic, 1A, phenol-preferring, member 1                           |
| Tcn2                                    | NM_022534          | -127  | 0.74 | 10778028 | transcobalamin 2                                                                              |
| Urod                                    | NM_019209          | -74   | 0.82 | 10878926 | uroporphyrinogen decarboxylase                                                                |
| <b>Proteolysis</b>                      |                    |       |      |          |                                                                                               |
| Rnf213                                  | ENSRNOT00000004904 | -16   | 0.81 | 10740016 | ring finger protein 213                                                                       |
| Cst3                                    | NM_012837          | -809  | 0.83 | 10850563 | cystatin C                                                                                    |
| Mcpt4l1                                 | XM_001056983       | 11    | 1.21 | 10780538 | mast cell protease 4-like 1                                                                   |
| LOC688812                               | XR_085983          | 26    | 1.22 | 10756117 | similar to ubiquitin-activating enzyme E1C                                                    |
| <b>Receptors &amp; Binding Proteins</b> |                    |       |      |          |                                                                                               |
| LOC100363058                            | XM_002742441       | -17   | 0.79 | 10709757 | olfactory receptor 480-like                                                                   |
| Mt2A                                    | NM_001137564       | -171  | 0.78 | 10827989 | metallothionein 2A                                                                            |
| Mt2A                                    | NM_001137564       | -326  | 0.81 | 10809399 | metallothionein 2A                                                                            |
| Olr1320                                 | NM_001000471       | 16    | 1.24 | 10909285 | olfactory receptor 1320                                                                       |
| Olr567                                  | NM_001000326       | -12   | 0.82 | 10847060 | olfactory receptor 567                                                                        |
| Olr760                                  | NM_001001069       | 28    | 1.33 | 10848105 | olfactory receptor 760                                                                        |
| Vom2r-ps27                              | ENSRNOT00000051051 | 17    | 1.21 | 10718403 | vomer nasal 2 receptor, pseudogene 27                                                         |
| <b>Signaling</b>                        |                    |       |      |          |                                                                                               |
| Cttna11                                 | NM_001106649       | -78   | 0.77 | 10876896 | catenin (cadherin associated protein), alpha-like 1                                           |
| Dusp5                                   | NM_133578          | -28   | 0.77 | 10716080 | dual specificity phosphatase 5                                                                |
| Fkbp14                                  | NM_001013210       | -66   | 0.75 | 10862643 | FK506 binding protein 14                                                                      |
| Fxyd1                                   | NM_031648          | -261  | 0.80 | 10720878 | FXYD domain-containing ion transport regulator 1                                              |
| Mark2                                   | NM_021699          | 98    | 1.22 | 10728396 | MAP                                                                                           |
| Magmas                                  | NM_001100136       | -24   | 0.83 | 10731783 | mitochondria-associated protein involved in                                                   |

|                                               |                    |      |      |          |                                                                                          |
|-----------------------------------------------|--------------------|------|------|----------|------------------------------------------------------------------------------------------|
|                                               |                    |      |      |          | granulocyte-macrophage colony-stimulating factor signal transduction                     |
| Nek6                                          | NM_182953          | -38  | 0.83 | 10835964 | NIMA (never in mitosis gene a)-related kinase 6                                          |
| <b>Transcription</b>                          |                    |      |      |          |                                                                                          |
| E2f5                                          | ENSRNOT00000014361 | -22  | 0.75 | 10718609 | E2F transcription factor 5                                                               |
| Giot1                                         | NM_133563          | 68   | 1.25 | 10900841 | gonadotropin inducible ovarian transcription factor 1                                    |
| Id3                                           | NM_013058          | -49  | 0.83 | 10872972 | inhibitor of DNA binding 3                                                               |
| Polr3k                                        | NM_001014259       | -158 | 0.82 | 10843132 | polymerase (RNA) III (DNA directed) polypeptide K                                        |
| Zcche11                                       | NM_001107953       | 54   | 1.20 | 10870777 | zinc finger, CCHC domain containing 11                                                   |
| <b>Translation &amp; Protein Modification</b> |                    |      |      |          |                                                                                          |
| Mrpl54                                        | NM_001106770       | -102 | 0.79 | 10893586 | mitochondrial ribosomal protein L54                                                      |
| Mphosph10                                     | NM_001106340       | 40   | 1.21 | 10722566 | M-phase phosphoprotein 10 (U3 small nucleolar ribonucleoprotein)                         |
| LOC499485                                     | XM_002725892       | 22   | 1.23 | 10820047 | similar to 60S ribosomal protein L17 (L23) (Amino acid starvation-induced protein) (ASI) |
| RGD1563579                                    | ENSRNOT00000057412 | 15   | 1.20 | 10939086 | similar to 60S ribosomal protein L29 (P23)                                               |
| Serp1                                         | NM_030835          | -201 | 0.80 | 10823309 | stress-associated endoplasmic reticulum protein 1                                        |
| <b>Miscellaneous &amp; Unknown</b>            |                    |      |      |          |                                                                                          |
| Fam100a                                       | BC079459           | 77   | 1.20 | 10731734 | family with sequence similarity 100, member A                                            |
| LOC100364350                                  | XM_002725175       | -64  | 0.81 | 10790658 | NACHT and WD repeat domain containing 1-like                                             |
| RGD1562420                                    | ENSRNOT00000007683 | 44   | 1.39 | 10887809 | similar to hypothetical protein                                                          |
| RGD1560187                                    | NM_001173556       | -140 | 0.83 | 10880897 | similar to Hypothetical UPF0327 protein                                                  |
| RGD1561667                                    | XM_217999          | 16   | 1.23 | 10703216 | similar to putative protein kinase                                                       |
| Tmem147                                       | NM_001038494       | -41  | 0.83 | 10720767 | transmembrane protein 147                                                                |
| Tmem38b                                       | NM_001014191       | -37  | 0.78 | 10869151 | transmembrane protein 38B                                                                |
| <b>EST's</b>                                  |                    |      |      |          |                                                                                          |
| RGD1311378                                    | BC166836           | -42  | 0.83 | 10842513 | similar to RIKEN cDNA 2010011I20                                                         |
|                                               | ---                | -81  | 0.78 | 10827665 |                                                                                          |
|                                               | ---                | -56  | 0.83 | 10731138 |                                                                                          |
|                                               | ---                | -49  | 0.75 | 10859627 |                                                                                          |
|                                               | ---                | -31  | 0.77 | 10904356 |                                                                                          |
|                                               | ---                | -28  | 0.79 | 10827448 |                                                                                          |
|                                               | ---                | -28  | 0.76 | 10779792 |                                                                                          |
|                                               | ---                | -26  | 0.64 | 10938173 |                                                                                          |
|                                               | ---                | -26  | 0.77 | 10730021 |                                                                                          |
|                                               | ---                | -22  | 0.82 | 10933128 |                                                                                          |
|                                               | ---                | -22  | 0.77 | 10870890 |                                                                                          |
|                                               | ---                | -21  | 0.81 | 10903058 |                                                                                          |
|                                               | ---                | -18  | 0.79 | 10939164 |                                                                                          |
|                                               | ---                | -12  | 0.83 | 10861356 |                                                                                          |
|                                               | ---                | -9   | 0.79 | 10765728 |                                                                                          |
|                                               | ---                | -9   | 0.79 | 10905970 |                                                                                          |
|                                               | ---                | 13   | 1.37 | 10774341 |                                                                                          |
|                                               | ---                | 13   | 1.26 | 10766994 |                                                                                          |
|                                               | ---                | 14   | 1.23 | 10717798 |                                                                                          |
|                                               | ---                | 17   | 1.28 | 10707376 |                                                                                          |
|                                               | ---                | 19   | 1.21 | 10801535 |                                                                                          |
|                                               | ---                | 23   | 1.21 | 10822348 |                                                                                          |
|                                               | ---                | 25   | 1.33 | 10853149 |                                                                                          |
|                                               | ---                | 28   | 1.57 | 10723687 |                                                                                          |
|                                               | ---                | 29   | 1.39 | 10859772 |                                                                                          |

|     |     |      |          |  |
|-----|-----|------|----------|--|
| --- | 29  | 1.30 | 10805577 |  |
| --- | 30  | 1.20 | 10736417 |  |
| --- | 33  | 1.21 | 10884738 |  |
| --- | 39  | 1.31 | 10792132 |  |
| --- | 42  | 1.21 | 10768369 |  |
| --- | 50  | 1.20 | 10795260 |  |
| --- | 50  | 1.20 | 10940007 |  |
| --- | 54  | 1.67 | 10922266 |  |
| --- | 70  | 1.21 | 10741664 |  |
| --- | 103 | 1.58 | 10791602 |  |
| --- | 103 | 1.58 | 10833416 |  |
| --- | 108 | 1.24 | 10930569 |  |
| --- | 122 | 1.44 | 10809882 |  |
| --- | 140 | 1.21 | 10805722 |  |
| --- | 142 | 1.66 | 10939699 |  |
| --- | 350 | 1.39 | 10820008 |  |
| --- | 754 | 1.34 | 10930602 |  |

**List 12. Genes Expressed Differentially in Stressed F3-Vinclozolin Rat CA1 of the Hippocampus as Compared to Non-Stressed F3-Vinclozolin ('Str-Vin vs Nst-Vin' contrast), 379 genes and EST's**

| <i>Gene Symbol</i>      | <i>GenBank_Reference Sequence</i> | <i>Mean_diff</i> | <i>Ratio</i> | <i>Affymetrix ID</i> | <i>Gene Title</i>                                                         |
|-------------------------|-----------------------------------|------------------|--------------|----------------------|---------------------------------------------------------------------------|
| <b>Apoptosis</b>        |                                   |                  |              |                      |                                                                           |
| Bace2                   | NM_001002802                      | -35              | 0.71         | 10750513             | beta-site APP-cleaving enzyme 2                                           |
| Dap3                    | NM_001011950                      | -83              | 0.81         | 10824373             | death associated protein 3                                                |
| Tifab                   | NM_001025029                      | -14              | 0.82         | 10793961             | TRAF-interacting protein with forkhead-associated domain, family member B |
| Tnfsf4                  | NM_053552                         | -22              | 0.80         | 10765092             | tumor necrosis factor (ligand) superfamily, member 4                      |
| Tnfaip8l3               | ENSRNOT00000038830                | -18              | 0.70         | 10917501             | tumor necrosis factor, alpha-induced protein 8-like 3                     |
| <b>Cell Cycle</b>       |                                   |                  |              |                      |                                                                           |
| Cenpc1                  | NM_001004098                      | -73              | 0.79         | 10772107             | centromere protein C 1                                                    |
| Cep70                   | NM_001017470                      | -56              | 0.78         | 10912464             | centrosomal protein 70kDa                                                 |
| Cspp1                   | ENSRNOT00000030345                | -128             | 0.71         | 10875091             | centrosome and spindle pole associated protein 1                          |
| Mcm8                    | NM_001106514                      | -17              | 0.80         | 10840112             | minichromosome maintenance complex component 8                            |
| Prc1                    | NM_001107529                      | -29              | 0.73         | 10708214             | protein regulator of cytokinesis 1                                        |
| <b>Cytoskeleton-ECM</b> |                                   |                  |              |                      |                                                                           |
| Cdh8                    | NM_053393                         | -335             | 0.61         | 10805767             | cadherin 8                                                                |
| Ceacam10                | NM_173339                         | 9.6              | 1.30         | 10705034             | carcinoembryonic antigen-related cell adhesion molecule 10                |
| Crtac1                  | NM_134401                         | -121             | 0.73         | 10715431             | cartilage acidic protein 1                                                |
| Dynlrb2                 | NM_001108451                      | -42              | 0.62         | 10811283             | dynein light chain roadblock-type 2                                       |
| Gjb6                    | NM_053388                         | -134             | 0.79         | 10784120             | gap junction protein, beta 6                                              |
| Fank1                   | NM_001008347                      | -14              | 0.78         | 10711777             | fibronectin type 3 and ankyrin repeat domains 1                           |
| Hapln1                  | NM_019189                         | -92              | 0.81         | 10812399             | hyaluronan and proteoglycan link protein 1                                |
| Krt17                   | NM_212545                         | 8                | 1.22         | 10747296             | keratin 17                                                                |
| Klra5                   | NM_198746                         | -13              | 0.78         | 10866236             | killer cell lectin-like receptor, subfamily A, member 5                   |
| LOC290704               | ENSRNOT000000596                  | 14               | 1.28         | 10787918             | similar to palladin                                                       |



|                           |                    |      |      |          |                                                                                             |
|---------------------------|--------------------|------|------|----------|---------------------------------------------------------------------------------------------|
|                           | 73                 |      |      |          |                                                                                             |
| Marvel2                   | NM_001108936       | -15  | 0.72 | 10820965 | MARVEL domain containing 2                                                                  |
| Mosc1                     | NM_001100811       | -9   | 0.83 | 10770503 | MOCO sulphurase C-terminal domain containing 1                                              |
| Myom2                     | NM_001169141       | -11  | 0.80 | 10792621 | myomesin 2                                                                                  |
| RGD1563615                | ENSRNOT00000046525 | 53   | 1.24 | 10793444 | similar to Contactin associated protein-like 3 precursor (Cell recognition molecule Caspr3) |
| Tbca                      | NM_001013245       | -51  | 0.78 | 10899579 | tubulin folding cofactor A                                                                  |
| Ttll3                     | NM_001108640       | -20  | 0.81 | 10857767 | tubulin tyrosine ligase-like family, member 3                                               |
| Ttll4                     | ENSRNOT00000023067 | -45  | 0.81 | 10924392 | tubulin tyrosine ligase-like family, member 4                                               |
| <b>Development</b>        |                    |      |      |          |                                                                                             |
| Cecr6                     | XM_001058567       | 20   | 1.25 | 10865198 | cat eye syndrome chromosome region, candidate 6 homolog (human)                             |
| Crygb                     | NM_001109875       | -9.9 | 0.80 | 10928555 | crystallin, gamma B                                                                         |
| Gsc2                      | NM_001108846       | 17   | 1.24 | 10752382 | gooseoid homeobox 2                                                                         |
| Gtl3                      | NM_001037978       | -113 | 0.78 | 10805895 | gene trap locus 3                                                                           |
| Lce1l                     | NM_001109493       | -48  | 0.76 | 10824769 | late cornified envelope 1L                                                                  |
| Lhx2                      | NM_001106571       | -87  | 0.78 | 10835958 | LIM homeobox 2                                                                              |
| Meox1                     | NM_001108837       | 23   | 1.20 | 10747682 | mesenchyme homeobox 1                                                                       |
| Myocd                     | NM_182667          | 22   | 1.26 | 10743652 | myocardin                                                                                   |
| Ntn1                      | AY028417           | 56   | 1.52 | 10743781 | netrin 1                                                                                    |
| Nlgn1                     | NM_053868          | -156 | 0.73 | 10822545 | neuroligin 1                                                                                |
| Popdc2                    | NM_199113          | -22  | 0.83 | 10754179 | popeye domain containing 2                                                                  |
| Ptov1                     | NM_001008304       | -95  | 0.80 | 10721504 | prostate tumor overexpressed 1                                                              |
| Robo3                     | NM_001108135       | -21  | 0.75 | 10916201 | roundabout homolog 3 (Drosophila)                                                           |
| Tecpr1                    | NM_001037191       | -81  | 0.82 | 10756638 | tectonin beta-propeller repeat containing 1                                                 |
| Vgll3                     | ENSRNOT00000042316 | -44  | 0.71 | 10749839 | vestigial like 3 (Drosophila)                                                               |
| Rcan3                     | NM_001012746       | 37   | 1.37 | 10880610 | RCAN family member 3                                                                        |
| Syt17                     | NM_138849          | 193  | 1.25 | 10725235 | synaptotagmin XVII                                                                          |
| Sntg1                     | ENSRNOT00000009679 | -100 | 0.77 | 10867345 | syntrophin, gamma 1                                                                         |
| Tert                      | NM_053423          | -22  | 0.80 | 10717517 | telomerase reverse transcriptase                                                            |
| Vasn                      | NM_001109382       | 41   | 1.21 | 10740701 | vasorin                                                                                     |
| <b>DNA Repair</b>         |                    |      |      |          |                                                                                             |
| Rad52                     | NM_001106617       | -46  | 0.80 | 10858260 | RAD52 homolog (S. cerevisiae)                                                               |
| <b>Electron Transport</b> |                    |      |      |          |                                                                                             |
| Cox18                     | NM_001106000       | -95  | 0.81 | 10771819 | COX18 cytochrome c oxidase assembly homolog (S. cerevisiae)                                 |
| Etfb                      | NM_001004220       | -110 | 0.67 | 10706339 | electron-transfer-flavoprotein, beta polypeptide                                            |
| LOC100174910              | NM_001131003       | -129 | 0.71 | 10804552 | glutaredoxin-like protein                                                                   |
| Prdx6                     | NM_053576          | -362 | 0.66 | 10769218 | peroxiredoxin 6                                                                             |
| Pdcl                      | NM_022247          | -115 | 0.83 | 10844776 | phosducin-like                                                                              |
| Pdcl2                     | ENSRNOT00000002953 | -12  | 0.74 | 10772243 | phosducin-like 2                                                                            |
| LOC691211                 | ENSRNOT00000050823 | -9.9 | 0.79 | 10724991 | similar to Cytochrome c, somatic                                                            |
| <b>Epigenetics</b>        |                    |      |      |          |                                                                                             |

|                                   |                    |      |      |          |                                                                                  |
|-----------------------------------|--------------------|------|------|----------|----------------------------------------------------------------------------------|
| Dph5                              | NM_001017449       | -32  | 0.82 | 10818581 | DPH5 <diphthamide methyltransferase > homolog (S. cerevisiae)                    |
| Hfm1                              | XM_002724927       | -17  | 0.80 | 10771099 | HFM1, ATP-dependent DNA helicase homolog (S. cerevisiae)                         |
| Hdac8                             | NM_001126373       | -65  | 0.78 | 10938734 | histone deacetylase 8                                                            |
| Tbx20                             | NM_001108132       | 12   | 1.20 | 10915817 | T-box 20                                                                         |
| <b>Growth Factors</b>             |                    |      |      |          |                                                                                  |
| Angpt1                            | NM_053546          | -30  | 0.69 | 10903529 | angiopoietin 1                                                                   |
| Dner                              | BC086329           | -186 | 0.80 | 10929482 | delta                                                                            |
| Gdf10                             | NM_024375          | -30  | 0.72 | 10786905 | growth differentiation factor 10                                                 |
| Il15                              | NM_013129          | -19  | 0.78 | 10806899 | interleukin 15                                                                   |
| Kng1l1                            | NM_001009628       | -63  | 0.66 | 10755135 | kininogen 1-like 1                                                               |
| Rxfp1                             | NM_201417          | 133  | 1.80 | 10823819 | relaxin                                                                          |
| Tgfb2                             | NM_031131          | 212  | 1.62 | 10770577 | transforming growth factor, beta 2                                               |
| Wnt7a                             | NM_001100473       | -48  | 0.75 | 10864094 | wingless-type MMTV integration site family, member 7A                            |
| <b>Immune Response</b>            |                    |      |      |          |                                                                                  |
| Cd244                             | NM_022259          | -13  | 0.77 | 10765625 | Cd244 molecule, natural killer cell receptor 2B4                                 |
| Cd302                             | NM_001013916       | -35  | 0.82 | 10845508 | CD302 molecule                                                                   |
| Cd5l                              | NM_001025685       | -31  | 0.77 | 10816270 | Cd5 molecule-like                                                                |
| Igh-1a                            | BC088254           | -12  | 0.81 | 10892533 | immunoglobulin heavy chain 1a (serum IgG2a)                                      |
| Il22                              | ENSRNOT00000009776 | -15  | 0.82 | 10895618 | interleukin 22                                                                   |
| LOC688858                         | XM_001068599       | -224 | 0.78 | 10759581 | similar to CD209a antigen                                                        |
| RT1-M6-1                          | NM_001008852       | -49  | 0.72 | 10827686 | RT1 class I, locus M6, gene 1                                                    |
| RT1-M6-2                          | NM_001008853       | -36  | 0.71 | 10827691 | RT1 class I, locus M6, gene 2                                                    |
| Spag8                             | NM_001173555       | -14  | 0.83 | 10876426 | sperm associated antigen 8                                                       |
| <b>Metabolism &amp; Transport</b> |                    |      |      |          |                                                                                  |
| Aadacl2                           | ENSRNOT00000067870 | -8   | 0.82 | 10815616 | arylacetamide deacetylase-like 2                                                 |
| Abhd3                             | NM_001106162       | -276 | 0.80 | 10803207 | abhydrolase domain containing 3                                                  |
| Acsbg1                            | NM_134389          | -230 | 0.81 | 10917568 | acyl-CoA synthetase bubblegum family member 1                                    |
| Adh1                              | NM_019286          | 27   | 1.27 | 10819379 | alcohol dehydrogenase 1 (class I)                                                |
| Adsl                              | NM_001130503       | -63  | 0.83 | 10897854 | adenylosuccinate lyase                                                           |
| Apopf                             | NM_001024351       | -16  | 0.80 | 10893064 | apolipoprotein F                                                                 |
| Ass1                              | NM_013157          | 27   | 1.37 | 10835355 | argininosuccinate synthetase 1                                                   |
| Atp5o                             | NM_138883          | -101 | 0.83 | 10753198 | ATP synthase, H+ transporting, mitochondrial F1 complex, O subunit               |
| Cad                               | NM_001105710       | -20  | 0.82 | 10888872 | carbamoyl-phosphate synthetase 2, aspartate transcarbamylase, and dihydroorotase |
| Coq9                              | NM_001035257       | -60  | 0.81 | 10809251 | coenzyme Q9 homolog (S. cerevisiae)                                              |
| Crot                              | NM_031987          | -58  | 0.80 | 10860548 | carnitine O-octanoyltransferase                                                  |
| Gcsh                              | NM_133598          | -127 | 0.80 | 10811293 | glycine cleavage system protein H (aminomethyl carrier)                          |
| Gk                                | NM_024381          | -79  | 0.77 | 10938219 | glycerol kinase                                                                  |
| Gstm5                             | NM_172038          | -245 | 0.81 | 10818291 | glutathione S-transferase, mu 5                                                  |
| Gstm7                             | NM_031154          | -296 | 0.78 | 10825890 | glutathione S-transferase, mu 7                                                  |
| Hsd11b1                           | NM_017080          | -226 | 0.67 | 10770795 | hydroxysteroid 11-beta dehydrogenase 1                                           |
| Kcnq5l                            | ENSRNOT00000040034 | -337 | 0.57 | 10926975 | potassium voltage-gated channel, subfamily Q, member 5-like                      |
| Peci                              | NM_001006966       | -75  | 0.80 | 10794769 | peroxisomal D3,D2-enoyl-CoA isomerase                                            |
| Pgcp                              | NM_031640          | -53  | 0.80 | 10896028 | plasma glutamate carboxypeptidase                                                |
| Phyh                              | NM_053674          | -136 | 0.81 | 10799558 | phytanoyl-CoA 2-hydroxylase                                                      |
| Ppcdc                             | NM_001108763       | -16  | 0.83 | 10917754 | phosphopantothenoylcysteine decarboxylase                                        |
| Ppid                              | NM_001004279       | -399 | 0.75 | 10816008 | peptidylprolyl isomerase D (cyclophilin D)                                       |
| Prodh                             | NM_001135778       | -134 | 0.70 | 10752352 | proline dehydrogenase                                                            |

|                                         |                    |       |      |          |                                                                                                |
|-----------------------------------------|--------------------|-------|------|----------|------------------------------------------------------------------------------------------------|
| Pygb                                    | NM_013188          | -296  | 0.78 | 10840700 | phosphorylase, glycogen; brain                                                                 |
| Sephs2                                  | NM_001079889       | 50    | 1.20 | 10725993 | selenophosphate synthetase 2                                                                   |
| Slc14a1                                 | NM_019346          | -166  | 0.80 | 10805335 | solute carrier family 14 (urea transporter), member 1                                          |
| Slc16a3                                 | NM_030834          | 39    | 1.26 | 10740209 | solute carrier family 16, member 3 (monocarboxylic acid transporter 4)                         |
| Slc45a2                                 | NM_001107653       | -9    | 0.82 | 10813686 | solute carrier family 45, member 2                                                             |
| Timm17a                                 | NM_019351          | -152  | 0.80 | 10890170 | translocase of inner mitochondrial membrane 17 homolog A (yeast)                               |
| Timm8a1                                 | NM_053370          | -119  | 0.81 | 10939289 | translocase of inner mitochondrial membrane 8 homolog a1 (yeast)                               |
| Tst                                     | NM_012808          | -82   | 0.83 | 10905284 | thiosulfate sulfurtransferase                                                                  |
| Ugt2b                                   | NM_031533          | -9    | 0.80 | 10771951 | UDP glycosyltransferase 2 family, polypeptide B                                                |
| Urod                                    | NM_019209          | -83   | 0.79 | 10878926 | uroporphyrinogen decarboxylase                                                                 |
| <b>Proteolysis</b>                      |                    |       |      |          |                                                                                                |
| Herpud1                                 | NM_053523          | -74   | 0.80 | 10809328 | homocysteine-inducible, endoplasmic reticulum stress-inducible, ubiquitin-like domain member 1 |
| Htra1                                   | NM_031721          | -397  | 0.74 | 10711566 | HtrA serine peptidase 1                                                                        |
| Kdelc1                                  | NM_001108217       | -57   | 0.83 | 10923000 | KDEL (Lys-Asp-Glu-Leu) containing 1                                                            |
| Klk15                                   | ENSRNOT00000038353 | -27   | 0.75 | 10706498 | kallikrein-related peptidase 15                                                                |
| LOC360228                               | NM_001003706       | -33   | 0.75 | 10736875 | WDNM1 homolog                                                                                  |
| Osgep                                   | NM_001100510       | -22   | 0.79 | 10783147 | O-sialoglycoprotein endopeptidase                                                              |
| Prep                                    | NM_031324          | -64   | 0.78 | 10830654 | prolyl endopeptidase                                                                           |
| Prss23                                  | NM_001007691       | -34   | 0.82 | 10708541 | protease, serine, 23                                                                           |
| Rnf146                                  | NM_001012060       | -165  | 0.80 | 10702424 | ring finger protein 146                                                                        |
| Timp4                                   | NM_001109393       | -70   | 0.81 | 10864732 | tissue inhibitor of metalloproteinase 4                                                        |
| Ubc                                     | NM_017314          | 350   | 1.34 | 10758134 | ubiquitin C                                                                                    |
| Ubr7                                    | NM_001007705       | -74   | 0.82 | 10886494 | ubiquitin protein ligase E3 component n-recognin 7 (putative)                                  |
| Usp3                                    | NM_001025424       | -20   | 0.81 | 10918345 | ubiquitin specific peptidase 3                                                                 |
| <b>Receptors &amp; Binding Proteins</b> |                    |       |      |          |                                                                                                |
| Adora2b                                 | NM_017161          | -36   | 0.76 | 10734291 | adenosine A2B receptor                                                                         |
| Adra1d                                  | NM_024483          | -81   | 0.75 | 10850087 | adrenergic, alpha-1D-, receptor                                                                |
| Bdkrb1                                  | NM_030851          | -17   | 0.83 | 10886644 | bradykinin receptor B1                                                                         |
| Efcab2                                  | NM_001105977       | -24   | 0.70 | 10766065 | EF-hand calcium binding domain 2                                                               |
| Efcab6                                  | ENSRNOT00000015447 | 16    | 1.34 | 10905871 | EF-hand calcium binding domain 6                                                               |
| Fgfr3                                   | NM_053429          | -64   | 0.79 | 10777748 | fibroblast growth factor receptor 3                                                            |
| Gabrg1                                  | NM_080586          | -432  | 0.65 | 10772544 | gamma-aminobutyric acid (GABA) A receptor, gamma 1                                             |
| Gfral                                   | ENSRNOT00000052341 | -9.8  | 0.82 | 10918752 | GNDF family receptor alpha like                                                                |
| Ifngr2                                  | NM_001108313       | -129  | 0.76 | 10750211 | interferon gamma receptor 2                                                                    |
| Igfbp5                                  | NM_012817          | 212   | 1.70 | 10928837 | insulin-like growth factor binding protein 5                                                   |
| Iscu                                    | NM_001105936       | -121  | 0.83 | 10762887 | iron-sulfur cluster scaffold homolog (E. coli)                                                 |
| MGC112715                               | NM_001044300       | 59    | 1.22 | 10829993 | platelet receptor Gi24                                                                         |
| Mt2A                                    | NM_001137564       | -626  | 0.67 | 10809399 | metallothionein 2A                                                                             |
| Mt2A                                    | NM_001137564       | -346  | 0.61 | 10827989 | metallothionein 2A                                                                             |
| Olr1069                                 | NM_001000522       | -12   | 0.78 | 10900095 | olfactory receptor 1069                                                                        |
| Olr1088                                 | ENSRNOT00000012907 | 25    | 1.22 | 10900905 | olfactory receptor 1088                                                                        |
| Olr120                                  | NM_001000154       | -21   | 0.75 | 10724297 | olfactory receptor 120                                                                         |
| Olr1321                                 | NM_001000792       | 10.4  | 1.22 | 10909287 | olfactory receptor 1321                                                                        |
| Olr1418                                 | NM_001000008       | -12   | 0.79 | 10742927 | olfactory receptor 1418                                                                        |
| Olr1557                                 | NM_001000050       | -10.1 | 0.75 | 10753565 | olfactory receptor 1557                                                                        |
| Olr1640                                 | NM_001000099       | -12   | 0.82 | 10783355 | olfactory receptor 1640                                                                        |
| Olr1714                                 | NM_214456          | -56   | 0.81 | 10830818 | olfactory receptor 1714                                                                        |
| Olr1734                                 | NM_001001119       | -9    | 0.74 | 10827639 | olfactory receptor 1734                                                                        |
| Olr221                                  | NM_001000200       | 24    | 1.41 | 10724609 | olfactory receptor 221                                                                         |

|                  |                    |       |      |          |                                                                                       |
|------------------|--------------------|-------|------|----------|---------------------------------------------------------------------------------------|
| Olr423           | NM_001000391       | 12    | 1.25 | 10835879 | olfactory receptor 423                                                                |
| Olr495           | NM_001000310       | 11    | 1.28 | 10846974 | olfactory receptor 495                                                                |
| Olr560           | NM_001000325       | -13   | 0.83 | 10837518 | olfactory receptor 560                                                                |
| Olr582           | NM_001000662       | -42   | 0.63 | 10837545 | olfactory receptor 582                                                                |
| Olr584           | NM_001000661       | -20   | 0.76 | 10847074 | olfactory receptor 584                                                                |
| Olr629           | NM_001001058       | -29   | 0.72 | 10847109 | olfactory receptor 629                                                                |
| Olr689           | NM_001000997       | 45    | 1.31 | 10847176 | olfactory receptor 689                                                                |
| Olr734           | NM_001000617       | -28   | 0.78 | 10847242 | olfactory receptor 734                                                                |
| Olr809           | NM_001000849       | 17    | 1.25 | 10855092 | olfactory receptor 809                                                                |
| Olr828           | NM_001000991       | 35    | 1.30 | 10858150 | olfactory receptor 828                                                                |
| Olr996           | NM_001000700       | 33    | 1.42 | 10893375 | olfactory receptor 996                                                                |
| Ptbp2            | NM_001005555       | -290  | 0.80 | 10826418 | polypyrimidine tract binding protein 2                                                |
| Sec14l2          | NM_053801          | -98   | 0.82 | 10778043 | SEC14-like 2 ( <i>S. cerevisiae</i> )                                                 |
| Tlr2             | NM_198769          | 10.0  | 1.25 | 10823970 | toll-like receptor 2                                                                  |
| Trhr             | NM_013047          | -23   | 0.72 | 10896394 | thyrotropin releasing hormone receptor                                                |
| V1rd23           | NM_001008947       | -16   | 0.83 | 10718780 | vomer nasal 1 receptor, D23                                                           |
| V1rg6            | NM_001008957       | -14   | 0.78 | 10894297 | vomer nasal 1 receptor, G6                                                            |
| Vom2r66          | ENSRNOT00000051621 | 74    | 1.37 | 10774903 | vomer nasal 2 receptor, 66                                                            |
| <b>Signaling</b> |                    |       |      |          |                                                                                       |
| Anxa6            | NM_024156          | -464  | 0.50 | 10742712 | annexin A6                                                                            |
| Arhgap1          | NM_001107747       | 127   | 1.28 | 10837960 | Rho GTPase activating protein 1                                                       |
| Aurkb            | NM_053749          | -12   | 0.77 | 10734853 | aurora kinase B                                                                       |
| Dbi              | NM_031853          | -92   | 0.78 | 10931154 | diazepam binding inhibitor (GABA receptor modulator, acyl-Coenzyme A binding protein) |
| Dusp4            | NM_022199          | -51   | 0.75 | 10792035 | dual specificity phosphatase 4                                                        |
| Efnal            | NM_053599          | 23    | 1.25 | 10824439 | ephrin A1                                                                             |
| Gbp4             | ENSRNOT00000022648 | -18   | 0.76 | 10819512 | guanylate binding protein 4                                                           |
| Gm2a             | NM_172335          | -99   | 0.82 | 10733690 | GM2 ganglioside activator                                                             |
| Gpr139           | NM_001024241       | 17    | 1.24 | 10725286 | G protein-coupled receptor 139                                                        |
| Grin2c           | NM_012575          | -57   | 0.81 | 10748891 | glutamate receptor, ionotropic, N-methyl D-aspartate 2C                               |
| Ick              | NM_138886          | 92    | 1.39 | 10911780 | intestinal cell kinase                                                                |
| Igtp             | NM_001008765       | -10.1 | 0.82 | 10733790 | interferon gamma induced GTPase                                                       |
| Inpp5j           | NM_133562          | -84   | 0.75 | 10777958 | inositol polyphosphate-5-phosphatase J                                                |
| LOC304239        | ENSRNOT00000049215 | -66   | 0.63 | 10756334 | similar to RalA binding protein 1                                                     |
| Map6d1           | NM_001108844       | 77    | 1.23 | 10752200 | MAP6 domain containing 1                                                              |
| MGC109340        | NM_001024267       | -167  | 0.77 | 10935036 | similar to Microsomal signal peptidase 23 kDa subunit (SPase 22 kDa subunit) (SPC22)  |
| Ndr3             | NM_001013923       | 277   | 1.22 | 10851210 | N-myc downstream regulated gene 3                                                     |
| Nek6             | NM_182953          | -64   | 0.75 | 10835964 | NIMA (never in mitosis gene a)-related kinase 6                                       |
| Pdk2             | NM_030872          | -161  | 0.82 | 10746469 | pyruvate dehydrogenase kinase, isozyme 2                                              |
| Pkib             | NM_001076553       | -13   | 0.82 | 10830216 | protein kinase (cAMP-dependent, catalytic) inhibitor beta                             |
| Plekho2          | ENSRNOT00000042633 | -48   | 0.68 | 10918288 | pleckstrin homology domain containing, family O member 2                              |
| Pygm             | NM_012638          | -95   | 0.77 | 10713382 | phosphorylase, glycogen, muscle                                                       |
| RGD1562165       | ENSRNOT00000029187 | -11   | 0.82 | 10876836 | similar to GABA(A) receptor-associated protein like 2                                 |
| Rilpl2           | NM_001004205       | -24   | 0.81 | 10758212 | Rab interacting lysosomal protein-like 2                                              |
| Rit1             | NM_001109185       | -89   | 0.82 | 10816607 | Ras-like without CAAX 1                                                               |
| Sgef             | ENSRNOT00000019553 | -73   | 0.73 | 10815663 | Src homology 3 domain-containing guanine nucleotide exchange factor                   |
| Sh3bp4           | NM_022693          | 128   | 1.50 | 10925264 | SH3-domain binding protein 4                                                          |
| Slamf1           | NM_001109078       | 16    | 1.23 | 10765639 | signaling lymphocytic activation molecule family member 1                             |
| Socs4            | NM_001107256       | -37   | 0.83 | 10779668 | suppressor of cytokine signaling 4                                                    |
| Srp14            | NM_001106497       | -125  | 0.81 | 10848434 | signal recognition particle 14                                                        |

| <b>Transcription</b>                          |                    |      |      |          |                                                                                                  |
|-----------------------------------------------|--------------------|------|------|----------|--------------------------------------------------------------------------------------------------|
| Ankdd1a                                       | ENSRNOT00000033512 | -19  | 0.73 | 10918281 | ankyrin repeat and death domain containing 1A                                                    |
| Ankrd60                                       | ENSRNOT00000055082 | -16  | 0.82 | 10852149 | ankyrin repeat domain 60                                                                         |
| Ccdc129                                       | ENSRNOT00000045930 | -19  | 0.72 | 10855741 | coiled-coil domain containing 129                                                                |
| Ccdc148                                       | NM_001107732       | -28  | 0.78 | 10845443 | coiled-coil domain containing 148                                                                |
| Ccdc153                                       | NM_001013953       | -72  | 0.56 | 10909463 | coiled-coil domain containing 153                                                                |
| Ccdc30                                        | ENSRNOT00000011325 | -41  | 0.81 | 10871570 | coiled-coil domain containing 30                                                                 |
| Ccdc37                                        | ENSRNOT00000024222 | -21  | 0.69 | 10864025 | coiled-coil domain containing 37                                                                 |
| Ccdc46                                        | NM_001105849       | -22  | 0.76 | 10739277 | coiled-coil domain containing 46                                                                 |
| Clip4                                         | NM_001013942       | -117 | 0.69 | 10888620 | CAP-GLY domain containing linker protein family, member 4                                        |
| Creb3l3                                       | NM_001012115       | 18   | 1.22 | 10893630 | cAMP responsive element binding protein 3-like 3                                                 |
| E2f5                                          | ENSRNOT00000014361 | -25  | 0.72 | 10718609 | E2F transcription factor 5                                                                       |
| Elk1                                          | NM_001108059       | 78   | 1.24 | 10936520 | ELK1, member of ETS oncogene family                                                              |
| Foxj2                                         | NM_001109352       | 42   | 1.23 | 10858529 | forkhead box J2                                                                                  |
| Gtf2ird1                                      | NM_001001504       | -18  | 0.80 | 10757829 | GTF2I repeat domain containing 1                                                                 |
| Haus1                                         | NM_138864          | 36   | 1.25 | 10805313 | HAUS augmin-like complex, subunit 1                                                              |
| Hint1                                         | ENSRNOT00000006471 | -20  | 0.70 | 10862836 | histidine triad nucleotide binding protein 1                                                     |
| Kbtbd11                                       | NM_001107326       | -43  | 0.74 | 10792660 | kelch repeat and BTB (POZ) domain containing 11                                                  |
| Klhl36                                        | NM_001017511       | -19  | 0.81 | 10808356 | kelch-like 36 (Drosophila)                                                                       |
| Luzp1                                         | AF181259           | -20  | 0.80 | 10873012 | leucine zipper protein 1                                                                         |
| March3                                        | NM_001007759       | -40  | 0.73 | 10804541 | membrane-associated ring finger (C3HC4) 3 nucleolar complex associated 4 homolog (S. cerevisiae) |
| Noc4l                                         | NM_001014129       | -40  | 0.81 | 10759342 | nucleolar protein NOP58                                                                          |
| Nop58                                         | NM_021754          | -117 | 0.82 | 10923670 | nucleolar protein NOP58                                                                          |
| Nutf2                                         | NM_001007629       | -117 | 0.80 | 10807386 | nuclear transport factor 2                                                                       |
| Ovca2                                         | NM_001109036       | -74  | 0.81 | 10744904 | candidate tumor suppressor in ovarian cancer 2                                                   |
| Pnrc1                                         | NM_173322          | 237  | 1.20 | 10875863 | proline-rich nuclear receptor coactivator 1                                                      |
| Polr3k                                        | NM_001014259       | -204 | 0.77 | 10843132 | polymerase (RNA) III (DNA directed) polypeptide K                                                |
| Ppara                                         | NM_013196          | -16  | 0.79 | 10898359 | peroxisome proliferator activated receptor alpha                                                 |
| RGD1565987                                    | ENSRNOT00000048737 | -47  | 0.79 | 10877694 | similar to F-box and leucine-rich repeat protein 18                                              |
| RGD1565987                                    | ENSRNOT00000048737 | -46  | 0.80 | 10756806 | similar to F-box and leucine-rich repeat protein 18                                              |
| Ssx1                                          | ENSRNOT00000030146 | -9   | 0.82 | 10936947 | synovial sarcoma, X breakpoint 1                                                                 |
| Tada2b                                        | NM_001170455       | -54  | 0.77 | 10773358 | transcriptional adaptor 2 (ADA2 homolog, yeast)-beta                                             |
| Zcchc3                                        | ENSRNOT00000009859 | 17   | 1.21 | 10850793 | zinc finger, CCHC domain containing 3                                                            |
| Zcchc6                                        | ENSRNOT00000067726 | 136  | 1.36 | 10793708 | zinc finger, CCHC domain containing 6                                                            |
| Zfp212                                        | ENSRNOT00000009054 | -76  | 0.80 | 10855203 | Zinc finger protein 212                                                                          |
| Znf488                                        | ENSRNOT00000031496 | 15   | 1.30 | 10790433 | zinc finger protein 488                                                                          |
| <b>Translation &amp; Protein Modification</b> |                    |      |      |          |                                                                                                  |
| Cwc22                                         | ENSRNOT00000037684 | -66  | 0.75 | 10846661 | CWC22 spliceosome-associated protein homolog (S. cerevisiae)                                     |
| Eif4e3                                        | NM_001106612       | -159 | 0.62 | 10864425 | eukaryotic translation initiation factor 4E member 3                                             |
| LOC500148                                     | NM_001035253       | 57   | 1.29 | 10862792 | similar to 40S ribosomal protein S7 (S8)                                                         |
| Lsm3                                          | NM_001106611       | -134 | 0.80 | 10857310 | LSM3 homolog, U6 small nuclear RNA associated (S. cerevisiae)                                    |
| Mrps16                                        | NM_001109518       | -69  | 0.81 | 10779159 | mitochondrial ribosomal protein S16                                                              |
| Qtrtd1                                        | ENSRNOT00000000317 | -30  | 0.81 | 10751196 | queuine tRNA-ribosyltransferase domain containing 1                                              |
| Rbm45                                         | NM_153306          | -65  | 0.81 | 10837056 | RNA binding motif protein 45                                                                     |
| RGD1560186                                    | ENSRNOT00000049634 | -9   | 0.78 | 10766758 | similar to ribosomal protein L37                                                                 |
| RGD1561736                                    | XM_001061583       | -80  | 0.76 | 10940411 | similar to ribosomal protein L10                                                                 |
| RGD1563551                                    | ENSRNOT00000047507 | -9   | 0.75 | 10865372 | similar to ribosomal protein L31                                                                 |
| RGD1565117                                    | ENSRNOT00000045687 | 9    | 1.22 | 10895828 | similar to 40S ribosomal protein S26                                                             |

|                                    |                    |       |      |          |                                                         |
|------------------------------------|--------------------|-------|------|----------|---------------------------------------------------------|
| Rnase4                             | NM_020082          | -87   | 0.78 | 10779832 | ribonuclease, RNase A family 4                          |
| Rpl28                              | NM_022697          | -186  | 0.81 | 10718863 | ribosomal protein L28                                   |
| Rplp2                              | NM_001030021       | 366   | 1.24 | 10776809 | ribosomal protein, large P2                             |
| <b>Miscellaneous &amp; Unknown</b> |                    |       |      |          |                                                         |
| Btbd16                             | NM_001017464       | -11   | 0.82 | 10711532 | BTB (POZ) domain containing 16                          |
| Dtwd1                              | NM_001013921       | 33    | 1.23 | 10839438 | DTW domain containing 1                                 |
| Dydc2                              | NM_001134797       | 12    | 1.20 | 10790647 | DPY30 domain containing 2                               |
| Fam123c                            | ENSRNOT00000033700 | -24   | 0.73 | 10922449 | family with sequence similarity 123C                    |
| Fam158a                            | BC086432           | -54   | 0.83 | 10783799 | family with sequence similarity 158, member A           |
| Fam198b                            | NM_199105          | 32    | 1.29 | 10816017 | family with sequence similarity 198, member B           |
| LOC100359838                       | XM_002728978       | 14    | 1.23 | 10833596 | ret finger protein-like 4-like                          |
| LOC100364350                       | XM_002725175       | -69   | 0.79 | 10790658 | NACHT and WD repeat domain containing 1-like            |
| LOC362863                          | NM_001170605       | -14   | 0.82 | 10894643 | first gene upstream of Nt5dc3                           |
| LOC363306                          | ENSRNOT00000043269 | 86    | 1.27 | 10921328 | hypothetical protein LOC363306                          |
| LOC502684                          | NM_001025060       | -17   | 0.68 | 10840826 | hypothetical protein LOC502684                          |
| LOC679307                          | ENSRNOT00000038733 | -12   | 0.73 | 10774245 | hypothetical protein LOC679307                          |
| LOC687395                          | ENSRNOT00000006406 | -139  | 0.82 | 10838278 | similar to CG9240-PA                                    |
| Lsmd1                              | NM_001105794       | -149  | 0.80 | 10734970 | LSM domain containing 1                                 |
| Luc7l3                             | NM_001108291       | -202  | 0.76 | 10746286 | LUC7-like 3 ( <i>S. cerevisiae</i> )                    |
| MGC94282                           | NR_027366          | 23    | 1.32 | 10865838 | similar to 5930416119Rik protein                        |
| Mterfd2                            | NM_001037209       | -32   | 0.78 | 10929991 | MTERF domain containing 2                               |
| Ptdc3                              | NM_001134718       | -105  | 0.80 | 10863158 | Pentatricopeptide repeat domain 3                       |
| RGD1305089                         | NM_001106730       | -80   | 0.81 | 10884648 | similar to 1110008L16Rik protein                        |
| RGD1310641                         | NM_001079701       | -14   | 0.78 | 10875910 | similar to hypothetical protein                         |
| RGD1559961                         | NM_001163736       | -71   | 0.80 | 10745785 | similar to novel protein                                |
| RGD1563072                         | NM_001107981       | 73    | 1.31 | 10872059 | similar to hypothetical protein FLJ38984                |
| RGD1565059                         | NM_001127562       | -18   | 0.83 | 10823456 | similar to hypothetical protein E130311K13              |
| Rtn4ip1                            | NM_001107644       | -72   | 0.76 | 10830630 | reticulon 4 interacting protein 1                       |
| Tlcd1                              | NM_001013858       | -91   | 0.76 | 10745214 | TLC domain containing 1                                 |
| Tmem186                            | NM_001025756       | -38   | 0.83 | 10731596 | transmembrane protein 186                               |
| Tmem208                            | NM_001106179       | -64   | 0.82 | 10807211 | transmembrane protein 208                               |
| Tmtc2                              | XM_001080732       | -77   | 0.78 | 10902080 | transmembrane and tetratricopeptide repeat containing 2 |
| Tsku                               | NM_001009965       | -32   | 0.82 | 10723822 | tsukushin                                               |
| ttc21a                             | ENSRNOT00000043831 | -22   | 0.68 | 10914271 | tetratricopeptide repeat domain 21A                     |
| Wdr60                              | ENSRNOT00000006144 | -40   | 0.82 | 10892677 | WD repeat domain 60                                     |
| Yjefn3                             | ENSRNOT00000065345 | -26   | 0.78 | 10787684 | YjeF N-terminal domain containing 3                     |
| <b>EST's</b>                       |                    |       |      |          |                                                         |
| RGD1311575                         | ENSRNOT00000002908 | -46   | 0.75 | 10776361 | hypothetical LOC289568                                  |
| LOC499565                          | NM_001047946       | -12   | 0.81 | 10814179 | LRRGT00038                                              |
| LOC689296                          | NM_001109531       | -14   | 0.80 | 10890190 | similar to expressed sequence C79407                    |
| RGD1306462                         | BC097453           | -13   | 0.83 | 10906065 | similar to RIKEN cDNA 1700019P01                        |
| RGD1305457                         | NM_001009430       | 15    | 1.25 | 10894842 | similar to RIKEN cDNA 1700023M03                        |
| LOC497940                          | BC079326           | -9    | 0.77 | 10744306 | similar to RIKEN cDNA 2810408A11                        |
| RGD1565158                         | ENSRNOT00000061709 | -36   | 0.71 | 10740325 | similar to RIKEN cDNA 4921537P18                        |
| RGD1306446                         | NM_001008554       | -10.3 | 0.81 | 10772030 | similar to RIKEN cDNA 9930032O22 gene                   |
|                                    | ---                | -702  | 0.76 | 10886848 |                                                         |
|                                    | ---                | -270  | 0.83 | 10865696 |                                                         |
|                                    | ---                | -170  | 0.75 | 10932269 |                                                         |
|                                    | ---                | -92   | 0.71 | 10894227 |                                                         |
|                                    | ---                | -91   | 0.74 | 10906590 |                                                         |
|                                    | ---                | -68   | 0.60 | 10914877 |                                                         |
|                                    | ---                | -65   | 0.61 | 10807957 |                                                         |

|  |     |       |      |          |  |
|--|-----|-------|------|----------|--|
|  | --- | -63   | 0.79 | 10783318 |  |
|  | --- | -63   | 0.78 | 10721694 |  |
|  | --- | -61   | 0.76 | 10758724 |  |
|  | --- | -53   | 0.77 | 10729852 |  |
|  | --- | -52   | 0.75 | 10749975 |  |
|  | --- | -49   | 0.83 | 10869187 |  |
|  | --- | -47   | 0.80 | 10914901 |  |
|  | --- | -47   | 0.64 | 10782509 |  |
|  | --- | -46   | 0.78 | 10738221 |  |
|  | --- | -45   | 0.74 | 10804712 |  |
|  | --- | -44   | 0.48 | 10776289 |  |
|  | --- | -42   | 0.79 | 10878965 |  |
|  | --- | -40   | 0.69 | 10726483 |  |
|  | --- | -39   | 0.77 | 10897004 |  |
|  | --- | -38   | 0.64 | 10802574 |  |
|  | --- | -36   | 0.65 | 10840477 |  |
|  | --- | -33   | 0.77 | 10717953 |  |
|  | --- | -33   | 0.78 | 10796438 |  |
|  | --- | -31   | 0.83 | 10812493 |  |
|  | --- | -30   | 0.81 | 10798486 |  |
|  | --- | -27   | 0.83 | 10938820 |  |
|  | --- | -25   | 0.81 | 10736814 |  |
|  | --- | -24   | 0.54 | 10800599 |  |
|  | --- | -22   | 0.80 | 10701814 |  |
|  | --- | -22   | 0.77 | 10755550 |  |
|  | --- | -22   | 0.60 | 10807883 |  |
|  | --- | -21   | 0.74 | 10818656 |  |
|  | --- | -20   | 0.77 | 10729554 |  |
|  | --- | -19   | 0.81 | 10706224 |  |
|  | --- | -19   | 0.76 | 10781888 |  |
|  | --- | -18   | 0.75 | 10764047 |  |
|  | --- | -17   | 0.81 | 10705392 |  |
|  | --- | -17   | 0.82 | 10840180 |  |
|  | --- | -17   | 0.70 | 10701666 |  |
|  | --- | -16   | 0.72 | 10708304 |  |
|  | --- | -16   | 0.81 | 10876998 |  |
|  | --- | -13   | 0.83 | 10717011 |  |
|  | --- | -13   | 0.83 | 10719289 |  |
|  | --- | -13   | 0.83 | 10841596 |  |
|  | --- | -12   | 0.75 | 10803721 |  |
|  | --- | -12   | 0.80 | 10894874 |  |
|  | --- | -12   | 0.76 | 10908152 |  |
|  | --- | -11   | 0.81 | 10719036 |  |
|  | --- | -11   | 0.79 | 10763316 |  |
|  | --- | -11   | 0.77 | 10839972 |  |
|  | --- | -11   | 0.80 | 10788343 |  |
|  | --- | -11   | 0.82 | 10860416 |  |
|  | --- | -11   | 0.82 | 10827409 |  |
|  | --- | -10.5 | 0.77 | 10890166 |  |
|  | --- | -10.4 | 0.80 | 10830185 |  |
|  | --- | -10.3 | 0.83 | 10910545 |  |
|  | --- | -10.2 | 0.75 | 10776737 |  |
|  | --- | -9.5  | 0.74 | 10752253 |  |
|  | --- | -9    | 0.82 | 10862921 |  |
|  | --- | -9    | 0.81 | 10876750 |  |
|  | --- | -9    | 0.78 | 10863051 |  |

|     |     |      |          |  |
|-----|-----|------|----------|--|
| --- | -9  | 0.78 | 10729120 |  |
| --- | -9  | 0.78 | 10934683 |  |
| --- | -8  | 0.79 | 10905970 |  |
| --- | -8  | 0.80 | 10791547 |  |
| --- | -7  | 0.82 | 10708451 |  |
| --- | -7  | 0.82 | 10703566 |  |
| --- | 9   | 1.23 | 10788345 |  |
| --- | 9   | 1.22 | 10874046 |  |
| --- | 11  | 1.26 | 10894850 |  |
| --- | 14  | 1.21 | 10868595 |  |
| --- | 14  | 1.35 | 10935227 |  |
| --- | 16  | 1.44 | 10886244 |  |
| --- | 18  | 1.23 | 10742118 |  |
| --- | 21  | 1.36 | 10816498 |  |
| --- | 21  | 1.50 | 10774341 |  |
| --- | 24  | 1.25 | 10801535 |  |
| --- | 25  | 1.32 | 10777433 |  |
| --- | 27  | 1.21 | 10764400 |  |
| --- | 28  | 1.30 | 10823676 |  |
| --- | 29  | 1.33 | 10731606 |  |
| --- | 33  | 1.29 | 10930576 |  |
| --- | 34  | 1.43 | 10838077 |  |
| --- | 42  | 1.33 | 10896201 |  |
| --- | 51  | 1.38 | 10863026 |  |
| --- | 53  | 1.28 | 10880526 |  |
| --- | 64  | 1.37 | 10797939 |  |
| --- | 68  | 1.59 | 10722816 |  |
| --- | 70  | 1.23 | 10833808 |  |
| --- | 111 | 1.29 | 10925808 |  |
| --- | 149 | 1.23 | 10833287 |  |
| --- | 161 | 1.28 | 10813246 |  |
| --- | 176 | 1.54 | 10741664 |  |
| --- | 195 | 1.24 | 10867364 |  |

**List 13. Genes Expressed Differentially in Non-Stressed F3-Vinclozolin Rat CA3 of the Hippocampus as Compared to Non-Stressed F3-Control ('Nst-Vin vs Nst-Con' contrast), 64 genes and EST's**

| <i>Gene Symbol</i>    | <i>GenBank_Reference Sequence</i> | <i>Mean_diff</i> | <i>Ratio</i> | <i>Affymetrix ID</i> | <i>Gene Title</i>                                         |
|-----------------------|-----------------------------------|------------------|--------------|----------------------|-----------------------------------------------------------|
| <b>Apoptosis</b>      |                                   |                  |              |                      |                                                           |
| Bfar                  | NM_001013125                      | 80               | 1.20         | 10731229             | bifunctional apoptosis regulator                          |
| <b>Development</b>    |                                   |                  |              |                      |                                                           |
| Pno1                  | NM_199083                         | 117              | 1.24         | 10778568             | partner of NOB1 homolog (S. cerevisiae)                   |
| LOC689303             | ENSRNOT00000041918                | -13              | 0.75         | 10797584             | similar to vitamin A-deficient testicular protein 11-like |
| <b>Growth Factors</b> |                                   |                  |              |                      |                                                           |
| Kng1                  | NM_012696                         | 8                | 1.20         | 10751988             | kininogen 1                                               |
| Prl8a7                | NM_022537                         | -11              | 0.83         | 10795057             | prolactin family 8, subfamily a, member 7                 |



|                                         |                    |     |      |          |                                                                                                 |
|-----------------------------------------|--------------------|-----|------|----------|-------------------------------------------------------------------------------------------------|
| <b>Immune Response</b>                  |                    |     |      |          |                                                                                                 |
| LOC502812                               | XM_002729360       | 23  | 1.27 | 10863000 | similar to [Human Ig rearranged gamma chain mRNA, V_J_C region and complete cds.], gene product |
| <b>Metabolism &amp; Transport</b>       |                    |     |      |          |                                                                                                 |
| Acaa2                                   | NM_130433          | -70 | 0.79 | 10802691 | acetyl-Coenzyme A acyltransferase 2                                                             |
| Chi3l4                                  | XM_001069770       | -17 | 0.82 | 10825768 | chitinase 3-like 4                                                                              |
| Kcnf1                                   | NM_001169104       | -62 | 0.81 | 10889326 | potassium voltage-gated channel, subfamily F, member 1                                          |
| Pop5                                    | NM_001105752       | 60  | 1.31 | 10762717 | processing of precursor 5, ribonuclease P                                                       |
| RGD1560402                              | XM_574850          | -57 | 0.81 | 10812969 | similar to Phosphoglycerate kinase 1                                                            |
| Ugt2b34                                 | ENSRNOT00000002728 | 11  | 1.23 | 10771993 | UDP glucuronosyltransferase 2 family, polypeptide B34                                           |
| <b>Proteolysis</b>                      |                    |     |      |          |                                                                                                 |
| Serpinb3                                | NM_001008887       | -9  | 0.82 | 10766988 | serine protease inhibitor B3                                                                    |
| Ube2n                                   | NM_053928          | 200 | 1.20 | 10860546 | ubiquitin-conjugating enzyme E2N                                                                |
| <b>Receptors &amp; Binding Proteins</b> |                    |     |      |          |                                                                                                 |
| Olr1545                                 | NM_001001105       | -26 | 0.73 | 10750630 | olfactory receptor 1545                                                                         |
| Epha5                                   | NM_001169137       | 221 | 1.20 | 10772128 | Eph receptor A5                                                                                 |
| Fgfr1                                   | NM_024146          | 153 | 1.23 | 10792304 | Fibroblast growth factor receptor 1                                                             |
| Wbp2                                    | NM_138975          | 155 | 1.21 | 10749108 | WW domain binding protein 2                                                                     |
| LOC365559                               | ENSRNOT00000035259 | -19 | 0.82 | 10832838 | similar to mannose-6-phosphate receptor binding protein 1                                       |
| Wipf3                                   | NM_147211          | 102 | 1.21 | 10855637 | WAS                                                                                             |
| <b>Signaling</b>                        |                    |     |      |          |                                                                                                 |
| Rcn3                                    | NM_001008694       | 25  | 1.21 | 10721641 | reticulocalbin 3, EF-hand calcium binding domain                                                |
| Sipa1l3                                 | ENSRNOT00000038929 | 159 | 1.25 | 10720504 | signal-induced proliferation-associated 1 like 3                                                |
| Tbc1d25                                 | NM_001106955       | 50  | 1.23 | 10932416 | TBC1 domain family, member 25                                                                   |
| RGD1560691                              | NM_001107365       | 204 | 1.23 | 10796307 | similar to calcium/calmodulin-dependent protein kinase 1D                                       |
| <b>Transcription</b>                    |                    |     |      |          |                                                                                                 |

|                                    |                    |      |      |          |                                              |
|------------------------------------|--------------------|------|------|----------|----------------------------------------------|
| Nrip3                              | NM_001108498       | 412  | 1.21 | 10724785 | nuclear receptor interacting protein 3       |
| <b>Miscellaneous &amp; Unknown</b> |                    |      |      |          |                                              |
| Fam50a                             | NM_001170573       | -40  | 0.81 | 10940358 | family with sequence similarity 50, member A |
| LOC502894                          | NM_001025064       | 90   | 1.24 | 10884921 | hypothetical protein LOC502894               |
| LOC678714                          | ENSRNOT00000051350 | -74  | 0.80 | 10862027 | hypothetical protein LOC678714               |
| RGD1563774                         | ENSRNOT00000045483 | -12  | 0.80 | 10875576 | similar to hypothetical protein 4930474N05   |
| Tmem60                             | ENSRNOT00000018040 | 90   | 1.24 | 10860269 | transmembrane protein 60                     |
| <b>EST's</b>                       |                    |      |      |          |                                              |
| RGD1566265                         | NM_001134589       | 97   | 1.22 | 10939002 | similar to RIKEN cDNA 2610002M06             |
| RGD1306282                         | ENSRNOT00000038294 | 13   | 1.26 | 10902621 | similar to RIKEN cDNA 4432406C05             |
|                                    | BC090072           | -30  | 0.64 | 10759435 |                                              |
|                                    | ---                | -241 | 0.80 | 10813353 |                                              |
|                                    | ---                | -130 | 0.77 | 10794749 |                                              |
|                                    | ---                | -117 | 0.74 | 10838153 |                                              |
|                                    | ---                | -83  | 0.58 | 10939888 |                                              |
|                                    | ---                | -70  | 0.74 | 10908655 |                                              |
|                                    | ---                | -60  | 0.74 | 10878386 |                                              |
|                                    | ---                | -58  | 0.61 | 10859195 |                                              |
|                                    | ---                | -57  | 0.63 | 10928205 |                                              |
|                                    | ---                | -56  | 0.81 | 10860184 |                                              |
|                                    | ---                | -46  | 0.81 | 10857448 |                                              |
|                                    | ---                | -39  | 0.73 | 10778586 |                                              |
|                                    | ---                | -34  | 0.69 | 10902762 |                                              |
|                                    | ---                | -33  | 0.74 | 10933576 |                                              |
|                                    | ---                | -30  | 0.64 | 10756268 |                                              |
|                                    | ---                | -30  | 0.64 | 10756270 |                                              |
|                                    | ---                | -30  | 0.64 | 10756272 |                                              |
|                                    | ---                | -30  | 0.64 | 10759445 |                                              |
|                                    | ---                | -28  | 0.76 | 10703289 |                                              |
|                                    | ---                | -25  | 0.77 | 10789042 |                                              |
|                                    | ---                | -23  | 0.72 | 10714409 |                                              |
|                                    | ---                | -21  | 0.83 | 10722413 |                                              |
|                                    | ---                | -20  | 0.79 | 10909129 |                                              |
|                                    | ---                | -16  | 0.82 | 10936019 |                                              |
|                                    | ---                | -16  | 0.79 | 10861395 |                                              |
|                                    | ---                | -16  | 0.83 | 10800386 |                                              |
|                                    | ---                | -12  | 0.82 | 10885297 |                                              |
|                                    | ---                | 20   | 1.35 | 10920741 |                                              |
|                                    | ---                | 20   | 1.42 | 10888777 |                                              |
|                                    | ---                | 24   | 1.23 | 10714177 |                                              |
|                                    | ---                | 52   | 1.21 | 10852671 |                                              |
|                                    | ---                | 70   | 1.39 | 10937568 |                                              |
| <b>EST's</b>                       |                    |      |      |          |                                              |
| RGD1566265                         | NM_001134589       | 97   | 1.22 | 10939002 | similar to RIKEN cDNA 2610002M06             |
| RGD1306282                         | ENSRNOT00000038294 | 13   | 1.26 | 10902621 | similar to RIKEN cDNA 4432406C05             |
|                                    | BC090072           | -30  | 0.64 | 10759435 |                                              |
|                                    | ---                | -241 | 0.80 | 10813353 |                                              |
|                                    | ---                | -130 | 0.77 | 10794749 |                                              |
|                                    | ---                | -117 | 0.74 | 10838153 |                                              |
|                                    | ---                | -83  | 0.58 | 10939888 |                                              |
|                                    | ---                | -70  | 0.74 | 10908655 |                                              |
|                                    | ---                | -60  | 0.74 | 10878386 |                                              |
|                                    | ---                | -58  | 0.61 | 10859195 |                                              |
|                                    | ---                | -57  | 0.63 | 10928205 |                                              |

|  |     |     |      |          |  |
|--|-----|-----|------|----------|--|
|  | --- | -56 | 0.81 | 10860184 |  |
|  | --- | -46 | 0.81 | 10857448 |  |
|  | --- | -39 | 0.73 | 10778586 |  |
|  | --- | -34 | 0.69 | 10902762 |  |
|  | --- | -33 | 0.74 | 10933576 |  |
|  | --- | -30 | 0.64 | 10756268 |  |
|  | --- | -30 | 0.64 | 10756270 |  |
|  | --- | -30 | 0.64 | 10756272 |  |
|  | --- | -30 | 0.64 | 10759445 |  |
|  | --- | -28 | 0.76 | 10703289 |  |
|  | --- | -25 | 0.77 | 10789042 |  |
|  | --- | -23 | 0.72 | 10714409 |  |
|  | --- | -21 | 0.83 | 10722413 |  |
|  | --- | -20 | 0.79 | 10909129 |  |
|  | --- | -16 | 0.82 | 10936019 |  |
|  | --- | -16 | 0.79 | 10861395 |  |
|  | --- | -16 | 0.83 | 10800386 |  |
|  | --- | -12 | 0.82 | 10885297 |  |
|  | --- | 20  | 1.35 | 10920741 |  |
|  | --- | 20  | 1.42 | 10888777 |  |
|  | --- | 24  | 1.23 | 10714177 |  |
|  | --- | 52  | 1.21 | 10852671 |  |
|  | --- | 70  | 1.39 | 10937568 |  |

**List 14. Genes Expressed Differentially in Stressed F3-Vinclozolin Rat CA3 of the Hippocampus as Compared to Stressed F3-Control ('St-Vin vs St-Con' contrast), 23 genes and EST's**

| <i>Gene Symbol</i>                            | <i>GenBank_Reference Sequence</i> | <i>Mean_diff</i> | <i>Ratio</i> | <i>Affymetrix ID</i> | <i>Gene Title</i>                                |
|-----------------------------------------------|-----------------------------------|------------------|--------------|----------------------|--------------------------------------------------|
| <b>Cell Cycle</b>                             |                                   |                  |              |                      |                                                  |
| Cspp1                                         | ENSRNOT00000008480                | -105             | 0.83         | 10875093             | centrosome and spindle pole associated protein 1 |
| <b>Immune Response</b>                        |                                   |                  |              |                      |                                                  |
| Cd38                                          | NM_013127                         | -30              | 0.82         | 10777232             | CD38 molecule                                    |
| <b>Receptors &amp; Binding Proteins</b>       |                                   |                  |              |                      |                                                  |
| Olr1443                                       | NM_001000018                      | 25               | 1.22         | 10733884             | olfactory receptor 1443                          |
| Olr1567                                       | NM_001000043                      | 16               | 1.23         | 10752235             | olfactory receptor 1567                          |
| Olr666                                        | NM_001000924                      | 13               | 1.21         | 10847144             | olfactory receptor 666                           |
| Olr921                                        | NM_001001385                      | 44               | 1.29         | 10900010             | olfactory receptor 921                           |
| <b>Signaling</b>                              |                                   |                  |              |                      |                                                  |
| Rab25                                         | NM_001107687                      | 17               | 1.20         | 10824339             | RAB25, member RAS oncogene family                |
| <b>Transcription</b>                          |                                   |                  |              |                      |                                                  |
| Zbtb41                                        | ENSRNOT00000015596                | -153             | 0.82         | 10764404             | zinc finger and BTB domain containing 41         |
| <b>Translation &amp; Protein Modification</b> |                                   |                  |              |                      |                                                  |
| RGD1565170                                    | ENSRNOT00000043836                | 20               | 1.32         | 10780763             | similar to 60S ribosomal protein L23a            |
| <b>Miscellaneous &amp; Unknown</b>            |                                   |                  |              |                      |                                                  |
| Fam75a4                                       | BC085936                          | -13              | 0.77         | 10796941             | family with sequence similarity 75, member A4    |
| RGD1563482                                    | NM_001109065                      | -25              | 0.82         | 10761736             | similar to hypothetical protein FLJ38663         |
| <b>EST's</b>                                  |                                   |                  |              |                      |                                                  |
|                                               | ---                               | -419             | 0.80         | 10886870             |                                                  |
|                                               | ---                               | -275             | 0.81         | 10886890             |                                                  |
|                                               | ---                               | -227             | 0.81         | 10886988             |                                                  |

|  |     |      |      |          |  |
|--|-----|------|------|----------|--|
|  | --- | -140 | 0.82 | 10908810 |  |
|  | --- | -92  | 0.82 | 10870979 |  |
|  | --- | -22  | 0.80 | 10938245 |  |
|  | --- | -15  | 0.82 | 10892616 |  |
|  | --- | 12   | 1.24 | 10759473 |  |
|  | --- | 18   | 1.21 | 10724999 |  |
|  | --- | 21   | 1.35 | 10703461 |  |
|  | --- | 59   | 1.39 | 10726672 |  |
|  | --- | 392  | 1.33 | 10902859 |  |

**List 15. Genes Expressed Differentially in Stressed F3-Control Rat CA3 of the Hippocampus as Compared to Non-Stressed F3-Control ('Str-Con vs Nst-Con' contrast), 50 genes and EST's**

| <i>Gene Symbol</i>                      | <i>GenBank_Reference Sequence</i> | <i>Mean_diff</i> | <i>Ratio</i> | <i>Affymetrix ID</i> | <i>Gene Title</i>                                                                                                            |
|-----------------------------------------|-----------------------------------|------------------|--------------|----------------------|------------------------------------------------------------------------------------------------------------------------------|
| <b>Cell Cycle</b>                       |                                   |                  |              |                      |                                                                                                                              |
| Cdk2ap2                                 | NM_001109498                      | -38              | 0.83         | 10712786             | CDK2-associated protein 2                                                                                                    |
| <b>Cytoskeleton-ECM</b>                 |                                   |                  |              |                      |                                                                                                                              |
| Lcelc                                   | ENSRNOT00000012420                | -6               | 0.82         | 10824752             | late cornified envelope 1C                                                                                                   |
| Spock3                                  | NM_001107310                      | -227             | 0.80         | 10791346             | sparc                                                                                                                        |
| <b>Growth Factors</b>                   |                                   |                  |              |                      |                                                                                                                              |
| Kng1                                    | NM_012696                         | 10.5             | 1.27         | 10751988             | kininogen 1                                                                                                                  |
| <b>Immune Response</b>                  |                                   |                  |              |                      |                                                                                                                              |
| LOC287167                               | NM_001013853                      | -85              | 0.82         | 10741765             | globin, alpha                                                                                                                |
| <b>Metabolism &amp; Transport</b>       |                                   |                  |              |                      |                                                                                                                              |
| Acaa2                                   | NM_130433                         | -60              | 0.82         | 10802691             | acetyl-Coenzyme A acyltransferase 2                                                                                          |
| Atp6ap11                                | ENSRNOT00000044237                | -52              | 0.77         | 10820308             | ATPase, H <sup>+</sup> transporting, lysosomal accessory protein 1-like                                                      |
| Hbb                                     | NM_033234                         | -374             | 0.63         | 10724311             | hemoglobin, beta                                                                                                             |
| MGC72973                                | NM_198776                         | -324             | 0.63         | 10724319             | beta-glo                                                                                                                     |
| Hba-a2                                  | NM_013096                         | -1192            | 0.70         | 10741756             | hemoglobin alpha, adult chain 2                                                                                              |
| Hbb                                     | NM_033234                         | -311             | 0.72         | 10724315             | hemoglobin, beta                                                                                                             |
| <b>Proteolysis</b>                      |                                   |                  |              |                      |                                                                                                                              |
| Rnf135                                  | ENSRNOT00000005428                | 8                | 1.22         | 10736636             | ring finger protein 135                                                                                                      |
| <b>Receptors &amp; Binding Proteins</b> |                                   |                  |              |                      |                                                                                                                              |
| Olr1222                                 | NM_001000440                      | 12               | 1.20         | 10909147             | olfactory receptor 1222                                                                                                      |
| Olr582                                  | NM_001000662                      | 24               | 1.25         | 10837545             | olfactory receptor 582                                                                                                       |
| Olr654                                  | NM_001000636                      | 41               | 1.28         | 10847125             | olfactory receptor 654                                                                                                       |
| Snupn                                   | NM_001004270                      | -74              | 0.82         | 10910252             | snurportin 1                                                                                                                 |
| <b>Signaling</b>                        |                                   |                  |              |                      |                                                                                                                              |
| Ctnn1                                   | NM_001106649                      | -90              | 0.81         | 10876896             | catenin (cadherin associated protein), alpha-like 1                                                                          |
| Sfn                                     | XM_001065560                      | 50               | 1.20         | 10872572             | stratifin                                                                                                                    |
| <b>Transcription</b>                    |                                   |                  |              |                      |                                                                                                                              |
| Lrrcc1                                  | NM_001100645                      | 98               | 1.21         | 10822290             | leucine rich repeat and coiled-coil domain containing 1                                                                      |
| LOC500210                               | XM_002726403                      | 9.8              | 1.22         | 10863370             | similar to High mobility group protein 1 (HMG-1) (High mobility group protein B1) (Amphoterin) (Heparin-binding protein p30) |
| Yeats2                                  | NM_001109057                      | -61              | 0.81         | 10755501             | YEATS domain containing 2                                                                                                    |

| <b>Miscellaneous &amp; Unknown</b> |                    |      |      |          |                                               |
|------------------------------------|--------------------|------|------|----------|-----------------------------------------------|
| Fam102b                            | NM_001163568       | -94  | 0.83 | 10826137 | family with sequence similarity 102, member B |
| RGD1562660                         | ENSRNOT00000044160 | -59  | 0.76 | 10809906 | RGD1562660                                    |
| RGD1563774                         | ENSRNOT00000045483 | -11  | 0.83 | 10875576 | similar to hypothetical protein 4930474N05    |
| <b>EST's</b>                       |                    |      |      |          |                                               |
| LOC100365935                       | BC160895           | 59   | 1.20 | 10833346 | rCG22129-like                                 |
|                                    | ---                | -78  | 0.66 | 10726672 |                                               |
|                                    | ---                | -70  | 0.81 | 10798900 |                                               |
|                                    | ---                | -66  | 0.71 | 10878386 |                                               |
|                                    | ---                | -47  | 0.67 | 10778586 |                                               |
|                                    | ---                | -35  | 0.71 | 10722413 |                                               |
|                                    | ---                | -32  | 0.83 | 10843159 |                                               |
|                                    | ---                | -29  | 0.74 | 10703289 |                                               |
|                                    | ---                | -27  | 0.81 | 10844062 |                                               |
|                                    | ---                | -20  | 0.82 | 10881476 |                                               |
|                                    | ---                | -16  | 0.80 | 10861395 |                                               |
|                                    | ---                | -15  | 0.79 | 10744141 |                                               |
|                                    | ---                | -12  | 0.82 | 10857000 |                                               |
|                                    | ---                | 10.3 | 1.24 | 10857203 |                                               |
|                                    | ---                | 13   | 1.27 | 10742245 |                                               |
|                                    | ---                | 16   | 1.24 | 10894848 |                                               |
|                                    | ---                | 18   | 1.23 | 10791329 |                                               |
|                                    | ---                | 19   | 1.24 | 10894798 |                                               |
|                                    | ---                | 23   | 1.31 | 10717136 |                                               |
|                                    | ---                | 25   | 1.27 | 10877933 |                                               |
|                                    | ---                | 25   | 1.21 | 10898117 |                                               |
|                                    | ---                | 51   | 1.22 | 10867699 |                                               |
|                                    | ---                | 57   | 1.22 | 10940126 |                                               |
|                                    | ---                | 65   | 1.20 | 10774605 |                                               |
|                                    | ---                | 72   | 1.26 | 10923212 |                                               |
|                                    | ---                | 75   | 1.47 | 10866205 |                                               |

**List 16. Genes Expressed Differentially in Stressed F3-Vinclozolin Rat CA3 of the Hippocampus as Compared to Non-Stressed F3-Vinclozolin ('Str-Vin vs Nst-Vin' contrast), 202 genes and EST's**

| <i>Gene Symbol</i>      | <i>GenBank_Reference Sequence</i> | <i>Mean_diff</i> | <i>Ratio</i> | <i>Affymetrix ID</i> | <i>Gene Title</i>                                                          |
|-------------------------|-----------------------------------|------------------|--------------|----------------------|----------------------------------------------------------------------------|
| <b>Apoptosis</b>        |                                   |                  |              |                      |                                                                            |
| Snn                     | NM_001034083                      | -162             | 0.81         | 10740408             | stannin                                                                    |
| <b>Cell Cycle</b>       |                                   |                  |              |                      |                                                                            |
| Ccnk                    | NM_001109672                      | -50              | 0.83         | 10886714             | cyclin K                                                                   |
| Cnm1                    | NM_001107593                      | -111             | 0.83         | 10730272             | cyclin M1                                                                  |
| Cspp1                   | ENSRNOT00000008480                | -120             | 0.83         | 10875087             | centrosome and spindle pole associated protein 1                           |
| RGD1563620              | ENSRNOT00000033132                | -146             | 0.82         | 10815924             | similar to retinoblastoma binding protein 4                                |
| <b>Cytoskeleton-ECM</b> |                                   |                  |              |                      |                                                                            |
| Cadm2                   | NM_001047102                      | -330             | 0.80         | 10752679             | cell adhesion molecule 2                                                   |
| Elmo2                   | NM_001134955                      | -168             | 0.82         | 10851753             | engulfment and cell motility 2                                             |
| Fxc1                    | NM_053371                         | 9                | 1.27         | 10833834             | fractured callus expressed transcript 1                                    |
| Jph1                    | NM_001106630                      | -105             | 0.77         | 10867081             | junctophilin 1                                                             |
| Krtap14l                | ENSRNOT00000064058                | 52               | 1.51         | 10752948             | keratin associated protein 14 like                                         |
| Lum                     | NM_031050                         | 15               | 1.21         | 10895083             | lumican                                                                    |
| Mast3                   | NM_001134796                      | -121             | 0.81         | 10787447             | microtubule associated serine                                              |
| Mfap3                   | NM_001007609                      | -68              | 0.83         | 10733726             | microfibrillar-associated protein 3                                        |
| Mical2                  | NM_001139508                      | -184             | 0.80         | 10709951             | microtubule associated monooxygenase, calponin and LIM domain containing 2 |

|                                   |                    |      |      |          |                                                                                        |
|-----------------------------------|--------------------|------|------|----------|----------------------------------------------------------------------------------------|
| Pcdh1                             | ENSRNOT00000026324 | -197 | 0.83 | 10804117 | protocadherin 1                                                                        |
| <b>Development</b>                |                    |      |      |          |                                                                                        |
| Clmn                              | NM_001106755       | -177 | 0.78 | 10892035 | calmin                                                                                 |
| Bbx                               | NM_001079938       | -72  | 0.82 | 10750900 | bobby sox homolog (Drosophila)                                                         |
| Shisa6                            | ENSRNOT00000057509 | -200 | 0.77 | 10743715 | shisa homolog 6 (Xenopus laevis)                                                       |
| Dpy19l3                           | NM_001135835       | -196 | 0.83 | 10721126 | dpy-19-like 3 (C. elegans)                                                             |
| Lrrc8b                            | NM_001107204       | -106 | 0.79 | 10775278 | leucine rich repeat containing 8 family, member B                                      |
| Msl1                              | NM_001107048       | -126 | 0.82 | 10738071 | male-specific lethal 1 homolog (Drosophila)                                            |
| Nedd4l                            | NM_001008300       | -192 | 0.83 | 10802231 | neural precursor cell expressed, developmentally down-regulated 4-like                 |
| Odz3                              | NM_001169133       | -91  | 0.78 | 10788086 | odz, odd Oz                                                                            |
| Sez6                              | ENSRNOT00000048543 | -234 | 0.82 | 10736119 | seizure related 6 homolog (mouse)                                                      |
| Sema3e                            | NM_001106579       | -180 | 0.81 | 10860457 | sema domain, immunoglobulin domain (Ig), short basic domain, secreted, (semaphorin) 3E |
| Skil                              | ENSRNOT00000013191 | -169 | 0.79 | 10822637 | SKI-like oncogene                                                                      |
| LOC689303                         | ENSRNOT00000041918 | 11   | 1.27 | 10797584 | similar to vitamin A-deficient testicular protein 11-like                              |
| Syn3                              | NM_017109          | -23  | 0.83 | 10894465 | synapsin III                                                                           |
| Sncg                              | NM_031688          | 47   | 1.20 | 10790471 | synuclein, gamma (breast cancer-specific protein 1)                                    |
| Wasf1                             | NM_001025114       | -374 | 0.80 | 10833952 | WAS protein family, member 1                                                           |
| <b>Epigenetics</b>                |                    |      |      |          |                                                                                        |
| Hist1h2bc                         | NM_001109400       | -90  | 0.81 | 10798488 | histone cluster 1, H2bc                                                                |
| Hist1h2bn                         | NM_001106114       | -51  | 0.82 | 10798494 | histone cluster 1, H2bn                                                                |
| Mir483                            | NR_032112          | 173  | 1.31 | 10727006 | microRNA mir-483                                                                       |
| Brd2                              | NM_212495          | -100 | 0.82 | 10828364 | bromodomain containing 2                                                               |
| Prmt8                             | ENSRNOT00000006878 | -184 | 0.83 | 10865790 | protein arginine methyltransferase 8                                                   |
| <b>Golgi Apparatus</b>            |                    |      |      |          |                                                                                        |
| Gga3                              | NM_001108304       | -106 | 0.82 | 10748973 | golgi associated, gamma adaptin ear containing, ARF binding protein 3                  |
| <b>Immune Response</b>            |                    |      |      |          |                                                                                        |
| Nfat5                             | NM_001107425       | -119 | 0.80 | 10807638 | nuclear factor of activated T-cells 5                                                  |
| LOC685767                         | ENSRNOT00000048964 | 20   | 1.22 | 10751086 | similar to OX-2 membrane glycoprotein precursor (MRC OX-2 antigen) (CD200 antigen)     |
| <b>Metabolism &amp; Transport</b> |                    |      |      |          |                                                                                        |
| Aldh1a2                           | NM_053896          | 34   | 1.31 | 10911380 | aldehyde dehydrogenase 1 family, member A2                                             |
| Aox4                              | ENSRNOT00000033068 | -208 | 0.80 | 10923476 | aldehyde oxidase 4                                                                     |
| Bco2                              | NM_001127712       | 38   | 1.21 | 10917215 | beta-carotene oxygenase 2                                                              |
| Cacnb4                            | NM_001105733       | -114 | 0.83 | 10845306 | calcium channel, voltage-dependent, beta 4 subunit                                     |
| Cacng8                            | NM_080696          | -172 | 0.82 | 10718561 | calcium channel, voltage-dependent, gamma subunit 8                                    |
| Commd10                           | NM_001004276       | -155 | 0.83 | 10801584 | COMM domain containing 10                                                              |
| Cyp4a2                            | NM_001044770       | 42   | 1.27 | 10878780 | cytochrome P450, family 4, subfamily a, polypeptide 2                                  |
| Elov16                            | NM_134383          | -111 | 0.83 | 10819005 | ELOVL family member 6, elongation of long chain fatty acids (yeast)                    |
| Hs6st2                            | ENSRNOT00000040165 | -84  | 0.74 | 10939725 | heparan sulfate 6-O-sulfotransferase 2                                                 |
| Ift88                             | NM_001107266       | -54  | 0.82 | 10780765 | intraflagellar transport 88 homolog (Chlamydomonas)                                    |
| Kcnd2                             | NM_031730          | -291 | 0.82 | 10853905 | potassium voltage-gated channel, Shal-related subfamily, member 2                      |
| Kcnn2                             | NM_019314          | -177 | 0.81 | 10801520 | potassium intermediate                                                                 |
| Nup205                            | NM_001108620       | -45  | 0.83 | 10854494 | nucleoporin 205                                                                        |
| Plcb1                             | NM_001077641       | -196 | 0.83 | 10840142 | phospholipase C, beta 1 (phosphoinositide-specific)                                    |
| Scn3b                             | NM_139097          | -487 | 0.83 | 10909328 | sodium channel, voltage-gated, type III, beta                                          |

|                                         |                    |      |      |          |                                                                    |
|-----------------------------------------|--------------------|------|------|----------|--------------------------------------------------------------------|
| St8sia3                                 | NM_013029          | -234 | 0.83 | 10802222 | ST8 alpha-N-acetyl-neuraminide alpha-2,8-sialyltransferase 3       |
| Trpc5                                   | NM_080898          | -222 | 0.72 | 10932726 | transient receptor potential cation channel, subfamily C, member 5 |
| Trak2                                   | NM_133560          | -207 | 0.81 | 10928307 | trafficking protein, kinesin binding 2                             |
| <b>Proteolysis</b>                      |                    |      |      |          |                                                                    |
| Adam23                                  | NM_001029899       | -143 | 0.82 | 10923877 | ADAM metallopeptidase domain 23                                    |
| Dpp6                                    | NM_022850          | -258 | 0.81 | 10859886 | dipeptidylpeptidase 6                                              |
| Hecw2                                   | NM_001108218       | -113 | 0.83 | 10928001 | HECT, C2 and WW domain containing E3 ubiquitin protein ligase 2    |
| <b>Receptors &amp; Binding Proteins</b> |                    |      |      |          |                                                                    |
| Baiap2                                  | NM_057196          | -190 | 0.83 | 10740094 | BAI1-associated protein 2                                          |
| Ctnbp2                                  | NM_001114401       | -245 | 0.83 | 10861171 | cortactin binding protein 2                                        |
| Epha5                                   | NM_001169137       | -226 | 0.83 | 10772128 | EphA5                                                              |
| Lphn3                                   | NM_130822          | -184 | 0.82 | 10776264 | latrophilin 3                                                      |
| Lrp6                                    | NM_001107892       | -96  | 0.82 | 10866374 | low density lipoprotein receptor-related protein 6                 |
| Olr105                                  | NM_001000146       | 91   | 1.21 | 10724274 | olfactory receptor 105                                             |
| Olr1143                                 | NM_001001017       | 56   | 1.20 | 10908171 | olfactory receptor 1143                                            |
| Olr1226                                 | NM_001000442       | 48   | 1.27 | 10909154 | olfactory receptor 1226                                            |
| Olr1364                                 | NM_001000858       | 139  | 1.23 | 10740780 | olfactory receptor 1364                                            |
| Olr1400                                 | NM_001001096       | 23   | 1.20 | 10733098 | olfactory receptor 1400                                            |
| Olr1567                                 | NM_001000043       | 17   | 1.25 | 10752235 | olfactory receptor 1567                                            |
| Olr1637                                 | NM_001000503       | 52   | 1.22 | 10783186 | olfactory receptor 1637                                            |
| Olr1714                                 | NM_214456          | 83   | 1.32 | 10830818 | olfactory receptor 1714                                            |
| Olr1726                                 | NM_001000896       | 102  | 1.34 | 10830830 | olfactory receptor 1726                                            |
| Olr546                                  | NM_001001054       | 73   | 1.30 | 10847049 | olfactory receptor 546                                             |
| Olr566                                  | NM_001000665       | 26   | 1.22 | 10837528 | olfactory receptor 566                                             |
| Olr712                                  | NM_001000624       | 9    | 1.27 | 10847215 | olfactory receptor 712                                             |
| Olr886                                  | NM_001001382       | 17   | 1.23 | 10899979 | olfactory receptor 886                                             |
| Olr921                                  | NM_001001385       | 46   | 1.31 | 10900010 | olfactory receptor 921                                             |
| RGD1566059                              | ENSRNOT00000046220 | 54   | 1.28 | 10838423 | similar to olfactory receptor Olfr1289                             |
| Sorl1                                   | NM_053519          | -227 | 0.83 | 10916493 | sortilin-related receptor, LDLR class A repeats-containing         |
| V1rc1                                   | NM_001008906       | 24   | 1.22 | 10855806 | vomer nasal 1 receptor, C1                                         |
| Vom2r24                                 | NM_001099493       | 32   | 1.27 | 10703632 | vomer nasal 2 receptor, 24                                         |
| Vom2r56                                 | NM_001099484       | 13   | 1.26 | 10901190 | vomer nasal 2 receptor, 56                                         |
| <b>Signaling</b>                        |                    |      |      |          |                                                                    |
| Csrnp3                                  | ENSRNOT00000007197 | -120 | 0.81 | 10836490 | cysteine-serine-rich nuclear protein 3                             |
| Defb49                                  | NM_001037527       | 55   | 1.21 | 10926837 | defensin beta 49                                                   |
| Defa24                                  | NM_001013053       | 16   | 1.21 | 10792538 | defensin, alpha, 24                                                |
| Dixdc1                                  | NM_001037654       | -72  | 0.79 | 10917260 | DIX domain containing 1                                            |
| Dgki                                    | NM_198782          | -129 | 0.80 | 10861843 | diacylglycerol kinase, iota                                        |
| Dclk2                                   | NM_001009691       | -179 | 0.79 | 10824091 | doublecortin-like kinase 2                                         |
| Frmf4b                                  | ENSRNOT00000010717 | -51  | 0.81 | 10864371 | FERM domain containing 4B                                          |
| Jak1                                    | NM_053466          | -219 | 0.83 | 10878286 | Janus kinase 1                                                     |
| Ksr1                                    | NM_001108284       | -72  | 0.82 | 10745303 | kinase suppressor of ras 1                                         |
| Ppp1r9a                                 | NM_053473          | -149 | 0.83 | 10853614 | protein phosphatase 1, regulatory (inhibitor) subunit 9A           |
| Rab11fip2                               | NM_001107447       | -128 | 0.83 | 10731140 | RAB11 family interacting protein 2 (class I)                       |
| Sipa1l3                                 | ENSRNOT00000038929 | -187 | 0.76 | 10720504 | signal-induced proliferation-associated 1 like 3                   |
| Sh3bp4                                  | NM_022693          | -55  | 0.82 | 10925264 | SH3-domain binding protein 4                                       |
| Snx19                                   | NM_001108131       | -129 | 0.79 | 10908764 | sorting nexin 19                                                   |
| Snx32                                   | ENSRNOT00000036745 | -56  | 0.81 | 10727884 | sorting nexin 32                                                   |
| Tbc1d25                                 | NM_001106955       | -49  | 0.82 | 10932416 | TBC1 domain family, member 25                                      |
| <b>Transcription</b>                    |                    |      |      |          |                                                                    |

|                                               |                    |      |      |          |                                                                                 |
|-----------------------------------------------|--------------------|------|------|----------|---------------------------------------------------------------------------------|
| Ankrd45                                       | ENSRNOT0000003857  | -161 | 0.82 | 10765051 | ankyrin repeat domain 45                                                        |
| Ahctf1                                        | ENSRNOT00000035875 | -131 | 0.80 | 10770261 | AT hook containing transcription factor 1                                       |
| Bcl6                                          | NM_001107084       | -80  | 0.80 | 10751931 | B-cell CLL                                                                      |
| Cnot7                                         | NM_001107313       | -196 | 0.82 | 10788414 | CCR4-NOT transcription complex, subunit 7                                       |
| Dnajb5                                        | NM_001108004       | -114 | 0.83 | 10868428 | DnaJ (Hsp40) homolog, subfamily B, member 5                                     |
| E2f5                                          | ENSRNOT00000014361 | -39  | 0.65 | 10718609 | E2F transcription factor 5                                                      |
| Ing2                                          | NM_001106083       | -63  | 0.82 | 10788134 | inhibitor of growth family, member 2                                            |
| Med14                                         | ENSRNOT00000066480 | -177 | 0.83 | 10932279 | mediator complex subunit 14                                                     |
| Myt1l                                         | NM_053888          | -157 | 0.83 | 10884001 | myelin transcription factor 1-like                                              |
| Mef2d                                         | NM_030860          | -91  | 0.81 | 10816470 | myocyte enhancer factor 2D                                                      |
| Pcif1                                         | NM_001108605       | -54  | 0.82 | 10842221 | PDX1 C-terminal inhibiting factor 1 <PDX1 = pancreatic and duodenal homeobox 1> |
| Tdpoz1                                        | XM_345239          | 45   | 1.21 | 10824790 | TD and POZ domain containing 1                                                  |
| Tcf3                                          | NM_001107865       | 59   | 1.21 | 10863277 | transcription factor 3                                                          |
| Yeats2                                        | NM_001109057       | -59  | 0.82 | 10755501 | YEATS domain containing 2                                                       |
| Zbtb45                                        | NM_001107478       | -26  | 0.82 | 10704281 | zinc finger and BTB domain containing 45                                        |
| Zeb2                                          | NM_001033701       | -317 | 0.81 | 10845072 | zinc finger E-box binding homeobox 2                                            |
| Zfp354b                                       | ENSRNOT0000004902  | -14  | 0.83 | 10742466 | zinc finger protein 354B                                                        |
| Zfp462                                        | ENSRNOT00000047225 | -121 | 0.71 | 10869158 | zinc finger protein 462                                                         |
| Znf667                                        | NM_001008557       | -62  | 0.83 | 10718696 | zinc finger protein 667                                                         |
| Dhx57                                         | ENSRNOT00000037705 | -66  | 0.82 | 10887990 | DEAH (Asp-Glu-Ala-Asp                                                           |
| <b>Translation &amp; Protein Modification</b> |                    |      |      |          |                                                                                 |
| Eif1b                                         | NM_001106867       | -197 | 0.82 | 10914349 | eukaryotic translation initiation factor 1B                                     |
| Eif4g3                                        | NM_001106693       | -133 | 0.83 | 10873226 | eukaryotic translation initiation factor 4 gamma, 3                             |
| Imp3                                          | NM_001108152       | -171 | 0.83 | 10910249 | IMP3, U3 small nucleolar ribonucleoprotein, homolog (yeast)                     |
| Prpf38b                                       | NM_001024305       | -86  | 0.83 | 10826130 | PRP38 pre-mRNA processing factor 38 (yeast) domain containing B                 |
| RGD1559743                                    | XM_001077121       | 22   | 1.21 | 10920785 | similar to 40S ribosomal protein S16                                            |
| RGD1559955                                    | ENSRNOT00000046179 | 72   | 1.35 | 10925757 | similar to 40S ribosomal protein S17                                            |
| <b>Miscellaneous &amp; Unknown</b>            |                    |      |      |          |                                                                                 |
| Fam102b                                       | NM_001163568       | -109 | 0.81 | 10826137 | family with sequence similarity 102, member B                                   |
| LOC681205                                     | ENSRNOT00000020640 | 15   | 1.23 | 10921453 | hypothetical protein LOC681205                                                  |
| LOC685340                                     | ENSRNOT00000039568 | 10   | 1.23 | 10933970 | hypothetical protein LOC685340                                                  |
| Prb1                                          | L17318             | 241  | 1.24 | 10866332 | proline-rich protein BstNI subfamily 1                                          |
| RGD1562660                                    | ENSRNOT00000044160 | -34  | 0.83 | 10809906 | RGD1562660                                                                      |
| RGD1563065                                    | ENSRNOT00000002978 | -105 | 0.76 | 10772788 | similar to 3110047P20Rik protein                                                |
| RGD1308297                                    | BC082039           | -166 | 0.82 | 10785745 | similar to CG10084-PA                                                           |
| RGD1564195                                    | ENSRNOT00000049044 | -79  | 0.82 | 10725914 | similar to hypothetical protein                                                 |
| RGD1306556                                    | ENSRNOT00000000901 | -35  | 0.80 | 10759227 | similar to hypothetical protein A530094D01                                      |
| RGD1564200                                    | NM_001108969       | -104 | 0.81 | 10867587 | similar to hypothetical protein MGC34646                                        |
| RGD1560883                                    | ENSRNOT00000018479 | -50  | 0.83 | 10812297 | similar to KIAA0825 protein                                                     |
| Trim2                                         | NM_001108552       | -344 | 0.83 | 10824017 | tripartite motif-containing 2                                                   |
| <b>EST's</b>                                  |                    |      |      |          |                                                                                 |
| LOC290577                                     | XM_002725158       | 40   | 1.33 | 10786993 | hypothetical LOC290577                                                          |
| RGD1564814                                    | ENSRNOT00000038133 | 28   | 1.25 | 10775737 | similar to CDNA sequence BC061212                                               |
| RGD1305664                                    | ENSRNOT00000004829 | -102 | 0.81 | 10743626 | similar to KIAA0672 gene product                                                |
| ---                                           |                    | -103 | 0.78 | 10722718 |                                                                                 |
| ---                                           |                    | -88  | 0.83 | 10867008 |                                                                                 |
| ---                                           |                    | -77  | 0.81 | 10743702 |                                                                                 |
| ---                                           |                    | -73  | 0.82 | 10869817 |                                                                                 |
| ---                                           |                    | -72  | 0.83 | 10801258 |                                                                                 |
| ---                                           |                    | -72  | 0.83 | 10924669 |                                                                                 |



|     |     |      |          |
|-----|-----|------|----------|
| --- | -71 | 0.81 | 10869614 |
| --- | -52 | 0.81 | 10743680 |
| --- | -52 | 0.81 | 10743699 |
| --- | -48 | 0.78 | 10765036 |
| --- | -48 | 0.82 | 10758033 |
| --- | -46 | 0.80 | 10765038 |
| --- | -29 | 0.79 | 10761268 |
| --- | -28 | 0.59 | 10888777 |
| --- | -23 | 0.82 | 10714177 |
| --- | -21 | 0.77 | 10815350 |
| --- | -18 | 0.81 | 10749977 |
| --- | -17 | 0.83 | 10882888 |
| --- | -13 | 0.81 | 10857000 |
| --- | -10 | 0.78 | 10887693 |
| --- | 7   | 1.24 | 10933227 |
| --- | 9   | 1.30 | 10850313 |
| --- | 10  | 1.23 | 10794940 |
| --- | 11  | 1.29 | 10788028 |
| --- | 11  | 1.21 | 10796768 |
| --- | 12  | 1.24 | 10806925 |
| --- | 14  | 1.27 | 10908156 |
| --- | 14  | 1.31 | 10892794 |
| --- | 15  | 1.26 | 10886267 |
| --- | 15  | 1.24 | 10822733 |
| --- | 17  | 1.21 | 10718428 |
| --- | 17  | 1.22 | 10787820 |
| --- | 18  | 1.21 | 10884694 |
| --- | 21  | 1.25 | 10789042 |
| --- | 22  | 1.23 | 10934042 |
| --- | 26  | 1.34 | 10828152 |
| --- | 26  | 1.77 | 10850319 |
| --- | 26  | 1.22 | 10769619 |
| --- | 28  | 1.30 | 10877933 |
| --- | 28  | 1.53 | 10703461 |
| --- | 33  | 1.23 | 10927211 |
| --- | 33  | 1.36 | 10933576 |
| --- | 40  | 1.24 | 10715188 |
| --- | 41  | 1.23 | 10904230 |
| --- | 41  | 1.21 | 10901836 |
| --- | 42  | 1.27 | 10797939 |
| --- | 46  | 1.26 | 10800328 |
| --- | 47  | 1.20 | 10717353 |
| --- | 52  | 1.30 | 10704169 |
| --- | 53  | 1.30 | 10773461 |
| --- | 55  | 1.25 | 10934978 |
| --- | 55  | 1.24 | 10913627 |
| --- | 68  | 1.76 | 10859195 |
| --- | 69  | 1.27 | 10802272 |
| --- | 125 | 1.25 | 10892656 |
| --- | 128 | 1.25 | 10934792 |
| --- | 211 | 1.26 | 10737708 |
| --- | 246 | 1.37 | 10719159 |
| --- | 346 | 1.24 | 10909581 |
| --- | 415 | 1.35 | 10902859 |
| --- | 685 | 1.39 | 10788070 |
| --- | 733 | 1.52 | 10815996 |
